# Supplementary material
Source: HighWire-hosted journal article supplement (https://jnis.bmj.com/content/neurintsurg-2021-018589)
Supplement: inline-supplementary-material-2 [file inline-supplementary-material-2.pdf]

## ICMJE DISCLOSURE FORM

**Date:** 12/21/2021

**Your Name:** Daniel Strbian

**Manuscript Title:** European Stroke Organisation (ESO) – European Society for Minimally Invasive Neurological Therapy (ESMINT) expedited recommendation on intravenous thrombolysis before mechanical thrombectomy in patients with acute ischemic stroke

**Manuscript Number (if known):** neurintsurg-2021-018589

In the interest of transparency, we ask you to disclose all relationships/activities/interests listed below that are related to the content of your manuscript. “Related” means any relation with for-profit or not-for-profit third parties whose interests may be affected by the content of the manuscript. Disclosure represents a commitment to transparency and does not necessarily indicate a bias. If you are in doubt about whether to list a relationship/activity/interest, it is preferable that you do so.

The author’s relationships/activities/interests should be defined broadly. For example, if your manuscript pertains to the epidemiology of hypertension, you should declare all relationships with manufacturers of antihypertensive medication, even if that medication is not mentioned in the manuscript.

In item #1 below, report all support for the work reported in this manuscript without time limit. For all other items, the time frame for disclosure is the past 36 months.

|                                                           | Name all entities with whom you have this relationship or indicate none (add rows as needed)                                                                                   | Specifications/Comments (e.g., if payments were made to you or to your institution)                                                                                                                                                                                                                                                                                                                                         |  |  |  |  |  |                                           |
|-----------------------------------------------------------|--------------------------------------------------------------------------------------------------------------------------------------------------------------------------------|-----------------------------------------------------------------------------------------------------------------------------------------------------------------------------------------------------------------------------------------------------------------------------------------------------------------------------------------------------------------------------------------------------------------------------|--|--|--|--|--|-------------------------------------------|
| <b>Time frame: Since the initial planning of the work</b> |                                                                                                                                                                                |                                                                                                                                                                                                                                                                                                                                                                                                                             |  |  |  |  |  |                                           |
| <b>1</b>                                                  | All support for the present manuscript (e.g., funding, provision of study materials, medical writing, article processing charges, etc.)<br><b>No time limit for this item.</b> | <input checked="" type="checkbox"/> <b>None</b><br><table border="1" style="width: 100%; border-collapse: collapse; margin-top: 5px;"> <tr><td style="width: 60%; height: 20px;"></td><td style="width: 40%;"></td></tr> <tr><td style="height: 20px;"></td><td></td></tr> <tr><td style="height: 20px;"></td><td style="text-align: right; font-size: small;">Click the tab key to add additional rows.</td></tr> </table> |  |  |  |  |  | Click the tab key to add additional rows. |
|                                                           |                                                                                                                                                                                |                                                                                                                                                                                                                                                                                                                                                                                                                             |  |  |  |  |  |                                           |
|                                                           |                                                                                                                                                                                |                                                                                                                                                                                                                                                                                                                                                                                                                             |  |  |  |  |  |                                           |
|                                                           | Click the tab key to add additional rows.                                                                                                                                      |                                                                                                                                                                                                                                                                                                                                                                                                                             |  |  |  |  |  |                                           |
| <b>Time frame: past 36 months</b>                         |                                                                                                                                                                                |                                                                                                                                                                                                                                                                                                                                                                                                                             |  |  |  |  |  |                                           |
| <b>2</b>                                                  | Grants or contracts from any entity (if not indicated in item #1 above).                                                                                                       | <input checked="" type="checkbox"/> <b>None</b><br><table border="1" style="width: 100%; border-collapse: collapse; margin-top: 5px;"> <tr><td style="width: 60%; height: 20px;"></td><td style="width: 40%;"></td></tr> <tr><td style="height: 20px;"></td><td></td></tr> <tr><td style="height: 20px;"></td><td></td></tr> </table>                                                                                       |  |  |  |  |  |                                           |
|                                                           |                                                                                                                                                                                |                                                                                                                                                                                                                                                                                                                                                                                                                             |  |  |  |  |  |                                           |
|                                                           |                                                                                                                                                                                |                                                                                                                                                                                                                                                                                                                                                                                                                             |  |  |  |  |  |                                           |
|                                                           |                                                                                                                                                                                |                                                                                                                                                                                                                                                                                                                                                                                                                             |  |  |  |  |  |                                           |
| <b>3</b>                                                  | Royalties or licenses                                                                                                                                                          | <input checked="" type="checkbox"/> <b>None</b><br><table border="1" style="width: 100%; border-collapse: collapse; margin-top: 5px;"> <tr><td style="width: 60%; height: 20px;"></td><td style="width: 40%;"></td></tr> <tr><td style="height: 20px;"></td><td></td></tr> <tr><td style="height: 20px;"></td><td></td></tr> </table>                                                                                       |  |  |  |  |  |                                           |
|                                                           |                                                                                                                                                                                |                                                                                                                                                                                                                                                                                                                                                                                                                             |  |  |  |  |  |                                           |
|                                                           |                                                                                                                                                                                |                                                                                                                                                                                                                                                                                                                                                                                                                             |  |  |  |  |  |                                           |
|                                                           |                                                                                                                                                                                |                                                                                                                                                                                                                                                                                                                                                                                                                             |  |  |  |  |  |                                           |

|    |                                                                                                              | Name all entities with whom you have this relationship or indicate none (add rows as needed)                                                                                                                                                                                                                   | Specifications/Comments (e.g., if payments were made to you or to your institution) |  |  |  |  |  |  |
|----|--------------------------------------------------------------------------------------------------------------|----------------------------------------------------------------------------------------------------------------------------------------------------------------------------------------------------------------------------------------------------------------------------------------------------------------|-------------------------------------------------------------------------------------|--|--|--|--|--|--|
| 4  | Consulting fees                                                                                              | <input checked="" type="checkbox"/> <b>None</b><br><table border="1" style="width: 100%; border-collapse: collapse;"> <tr><td style="height: 20px;"> </td><td style="width: 50%;"> </td></tr> <tr><td style="height: 20px;"> </td><td> </td></tr> <tr><td style="height: 20px;"> </td><td> </td></tr> </table> |                                                                                     |  |  |  |  |  |  |
|    |                                                                                                              |                                                                                                                                                                                                                                                                                                                |                                                                                     |  |  |  |  |  |  |
|    |                                                                                                              |                                                                                                                                                                                                                                                                                                                |                                                                                     |  |  |  |  |  |  |
|    |                                                                                                              |                                                                                                                                                                                                                                                                                                                |                                                                                     |  |  |  |  |  |  |
| 5  | Payment or honoraria for lectures, presentations, speakers bureaus, manuscript writing or educational events | <input checked="" type="checkbox"/> <b>None</b><br><table border="1" style="width: 100%; border-collapse: collapse;"> <tr><td style="height: 20px;"> </td><td style="width: 50%;"> </td></tr> <tr><td style="height: 20px;"> </td><td> </td></tr> <tr><td style="height: 20px;"> </td><td> </td></tr> </table> |                                                                                     |  |  |  |  |  |  |
|    |                                                                                                              |                                                                                                                                                                                                                                                                                                                |                                                                                     |  |  |  |  |  |  |
|    |                                                                                                              |                                                                                                                                                                                                                                                                                                                |                                                                                     |  |  |  |  |  |  |
|    |                                                                                                              |                                                                                                                                                                                                                                                                                                                |                                                                                     |  |  |  |  |  |  |
| 6  | Payment for expert testimony                                                                                 | <input checked="" type="checkbox"/> <b>None</b><br><table border="1" style="width: 100%; border-collapse: collapse;"> <tr><td style="height: 20px;"> </td><td style="width: 50%;"> </td></tr> <tr><td style="height: 20px;"> </td><td> </td></tr> <tr><td style="height: 20px;"> </td><td> </td></tr> </table> |                                                                                     |  |  |  |  |  |  |
|    |                                                                                                              |                                                                                                                                                                                                                                                                                                                |                                                                                     |  |  |  |  |  |  |
|    |                                                                                                              |                                                                                                                                                                                                                                                                                                                |                                                                                     |  |  |  |  |  |  |
|    |                                                                                                              |                                                                                                                                                                                                                                                                                                                |                                                                                     |  |  |  |  |  |  |
| 7  | Support for attending meetings and/or travel                                                                 | <input checked="" type="checkbox"/> <b>None</b><br><table border="1" style="width: 100%; border-collapse: collapse;"> <tr><td style="height: 20px;"> </td><td style="width: 50%;"> </td></tr> <tr><td style="height: 20px;"> </td><td> </td></tr> <tr><td style="height: 20px;"> </td><td> </td></tr> </table> |                                                                                     |  |  |  |  |  |  |
|    |                                                                                                              |                                                                                                                                                                                                                                                                                                                |                                                                                     |  |  |  |  |  |  |
|    |                                                                                                              |                                                                                                                                                                                                                                                                                                                |                                                                                     |  |  |  |  |  |  |
|    |                                                                                                              |                                                                                                                                                                                                                                                                                                                |                                                                                     |  |  |  |  |  |  |
| 8  | Patents planned, issued or pending                                                                           | <input checked="" type="checkbox"/> <b>None</b><br><table border="1" style="width: 100%; border-collapse: collapse;"> <tr><td style="height: 20px;"> </td><td style="width: 50%;"> </td></tr> <tr><td style="height: 20px;"> </td><td> </td></tr> <tr><td style="height: 20px;"> </td><td> </td></tr> </table> |                                                                                     |  |  |  |  |  |  |
|    |                                                                                                              |                                                                                                                                                                                                                                                                                                                |                                                                                     |  |  |  |  |  |  |
|    |                                                                                                              |                                                                                                                                                                                                                                                                                                                |                                                                                     |  |  |  |  |  |  |
|    |                                                                                                              |                                                                                                                                                                                                                                                                                                                |                                                                                     |  |  |  |  |  |  |
| 9  | Participation on a Data Safety Monitoring Board or Advisory Board                                            | <input checked="" type="checkbox"/> <b>None</b><br><table border="1" style="width: 100%; border-collapse: collapse;"> <tr><td style="height: 20px;"> </td><td style="width: 50%;"> </td></tr> <tr><td style="height: 20px;"> </td><td> </td></tr> <tr><td style="height: 20px;"> </td><td> </td></tr> </table> |                                                                                     |  |  |  |  |  |  |
|    |                                                                                                              |                                                                                                                                                                                                                                                                                                                |                                                                                     |  |  |  |  |  |  |
|    |                                                                                                              |                                                                                                                                                                                                                                                                                                                |                                                                                     |  |  |  |  |  |  |
|    |                                                                                                              |                                                                                                                                                                                                                                                                                                                |                                                                                     |  |  |  |  |  |  |
| 10 | Leadership or fiduciary role in other board, society, committee or advocacy group, paid or unpaid            | <input checked="" type="checkbox"/> <b>None</b><br><table border="1" style="width: 100%; border-collapse: collapse;"> <tr><td style="height: 20px;"> </td><td style="width: 50%;"> </td></tr> <tr><td style="height: 20px;"> </td><td> </td></tr> <tr><td style="height: 20px;"> </td><td> </td></tr> </table> |                                                                                     |  |  |  |  |  |  |
|    |                                                                                                              |                                                                                                                                                                                                                                                                                                                |                                                                                     |  |  |  |  |  |  |
|    |                                                                                                              |                                                                                                                                                                                                                                                                                                                |                                                                                     |  |  |  |  |  |  |
|    |                                                                                                              |                                                                                                                                                                                                                                                                                                                |                                                                                     |  |  |  |  |  |  |

|                                                                                                                                                                                                                                                               |                                                                                  | Name all entities with whom you have this relationship or indicate none (add rows as needed)                                                                                                                                                                                                                   | Specifications/Comments (e.g., if payments were made to you or to your institution) |  |  |  |  |  |  |
|---------------------------------------------------------------------------------------------------------------------------------------------------------------------------------------------------------------------------------------------------------------|----------------------------------------------------------------------------------|----------------------------------------------------------------------------------------------------------------------------------------------------------------------------------------------------------------------------------------------------------------------------------------------------------------|-------------------------------------------------------------------------------------|--|--|--|--|--|--|
| <b>11</b>                                                                                                                                                                                                                                                     | Stock or stock options                                                           | <input checked="" type="checkbox"/> <b>None</b><br><table border="1" style="width: 100%; border-collapse: collapse;"> <tr><td style="height: 20px;"> </td><td style="width: 50%;"> </td></tr> <tr><td style="height: 20px;"> </td><td> </td></tr> <tr><td style="height: 20px;"> </td><td> </td></tr> </table> |                                                                                     |  |  |  |  |  |  |
|                                                                                                                                                                                                                                                               |                                                                                  |                                                                                                                                                                                                                                                                                                                |                                                                                     |  |  |  |  |  |  |
|                                                                                                                                                                                                                                                               |                                                                                  |                                                                                                                                                                                                                                                                                                                |                                                                                     |  |  |  |  |  |  |
|                                                                                                                                                                                                                                                               |                                                                                  |                                                                                                                                                                                                                                                                                                                |                                                                                     |  |  |  |  |  |  |
| <b>12</b>                                                                                                                                                                                                                                                     | Receipt of equipment, materials, drugs, medical writing, gifts or other services | <input checked="" type="checkbox"/> <b>None</b><br><table border="1" style="width: 100%; border-collapse: collapse;"> <tr><td style="height: 20px;"> </td><td style="width: 50%;"> </td></tr> <tr><td style="height: 20px;"> </td><td> </td></tr> <tr><td style="height: 20px;"> </td><td> </td></tr> </table> |                                                                                     |  |  |  |  |  |  |
|                                                                                                                                                                                                                                                               |                                                                                  |                                                                                                                                                                                                                                                                                                                |                                                                                     |  |  |  |  |  |  |
|                                                                                                                                                                                                                                                               |                                                                                  |                                                                                                                                                                                                                                                                                                                |                                                                                     |  |  |  |  |  |  |
|                                                                                                                                                                                                                                                               |                                                                                  |                                                                                                                                                                                                                                                                                                                |                                                                                     |  |  |  |  |  |  |
| <b>13</b>                                                                                                                                                                                                                                                     | Other financial or non-financial interests                                       | <input checked="" type="checkbox"/> <b>None</b><br><table border="1" style="width: 100%; border-collapse: collapse;"> <tr><td style="height: 20px;"> </td><td style="width: 50%;"> </td></tr> <tr><td style="height: 20px;"> </td><td> </td></tr> <tr><td style="height: 20px;"> </td><td> </td></tr> </table> |                                                                                     |  |  |  |  |  |  |
|                                                                                                                                                                                                                                                               |                                                                                  |                                                                                                                                                                                                                                                                                                                |                                                                                     |  |  |  |  |  |  |
|                                                                                                                                                                                                                                                               |                                                                                  |                                                                                                                                                                                                                                                                                                                |                                                                                     |  |  |  |  |  |  |
|                                                                                                                                                                                                                                                               |                                                                                  |                                                                                                                                                                                                                                                                                                                |                                                                                     |  |  |  |  |  |  |
| <p><b>Please place an "X" next to the following statement to indicate your agreement:</b></p> <p><input checked="" type="checkbox"/> I certify that I have answered every question and have not altered the wording of any of the questions on this form.</p> |                                                                                  |                                                                                                                                                                                                                                                                                                                |                                                                                     |  |  |  |  |  |  |

## ICMJE DISCLOSURE FORM

**Date:** 12/21/2021

**Your Name:** Philip White

**Manuscript Title:** European Stroke Organisation (ESO) – European Society for Minimally Invasive Neurological Therapy (ESMINT) expedited recommendation on intravenous thrombolysis before mechanical thrombectomy in patients with acute ischemic stroke

**Manuscript Number (if known):** neurintsurg-2021-018589

In the interest of transparency, we ask you to disclose all relationships/activities/interests listed below that are related to the content of your manuscript. “Related” means any relation with for-profit or not-for-profit third parties whose interests may be affected by the content of the manuscript. Disclosure represents a commitment to transparency and does not necessarily indicate a bias. If you are in doubt about whether to list a relationship/activity/interest, it is preferable that you do so.

The author’s relationships/activities/interests should be defined broadly. For example, if your manuscript pertains to the epidemiology of hypertension, you should declare all relationships with manufacturers of antihypertensive medication, even if that medication is not mentioned in the manuscript.

In item #1 below, report all support for the work reported in this manuscript without time limit. For all other items, the time frame for disclosure is the past 36 months.

|                                                           | Name all entities with whom you have this relationship or indicate none (add rows as needed)                                                                                   | Specifications/Comments (e.g., if payments were made to you or to your institution)                                                                                                                                                                                                                                                                                                                                                                                  |         |                                 |           |                                 |          |                                           |
|-----------------------------------------------------------|--------------------------------------------------------------------------------------------------------------------------------------------------------------------------------|----------------------------------------------------------------------------------------------------------------------------------------------------------------------------------------------------------------------------------------------------------------------------------------------------------------------------------------------------------------------------------------------------------------------------------------------------------------------|---------|---------------------------------|-----------|---------------------------------|----------|-------------------------------------------|
| <b>Time frame: Since the initial planning of the work</b> |                                                                                                                                                                                |                                                                                                                                                                                                                                                                                                                                                                                                                                                                      |         |                                 |           |                                 |          |                                           |
| <b>1</b>                                                  | All support for the present manuscript (e.g., funding, provision of study materials, medical writing, article processing charges, etc.)<br><b>No time limit for this item.</b> | <input checked="" type="checkbox"/> <b>None</b><br><table border="1" style="width: 100%; border-collapse: collapse; margin-top: 5px;"> <tr><td style="width: 50%; height: 15px;"></td><td style="width: 50%;"></td></tr> <tr><td style="height: 15px;"></td><td></td></tr> <tr><td style="height: 15px;"></td><td style="text-align: right; font-size: small;">Click the tab key to add additional rows.</td></tr> </table>                                          |         |                                 |           |                                 |          | Click the tab key to add additional rows. |
|                                                           |                                                                                                                                                                                |                                                                                                                                                                                                                                                                                                                                                                                                                                                                      |         |                                 |           |                                 |          |                                           |
|                                                           |                                                                                                                                                                                |                                                                                                                                                                                                                                                                                                                                                                                                                                                                      |         |                                 |           |                                 |          |                                           |
|                                                           | Click the tab key to add additional rows.                                                                                                                                      |                                                                                                                                                                                                                                                                                                                                                                                                                                                                      |         |                                 |           |                                 |          |                                           |
| <b>Time frame: past 36 months</b>                         |                                                                                                                                                                                |                                                                                                                                                                                                                                                                                                                                                                                                                                                                      |         |                                 |           |                                 |          |                                           |
| <b>2</b>                                                  | Grants or contracts from any entity (if not indicated in item #1 above).                                                                                                       | <input type="checkbox"/> <b>None</b><br><table border="1" style="width: 100%; border-collapse: collapse; margin-top: 5px;"> <tr> <td style="width: 50%; font-size: small;">Stryker</td> <td style="width: 50%;">Institutional Educational Grant</td> </tr> <tr> <td style="font-size: small;">Medtronic</td> <td>Institutional Educational Grant</td> </tr> <tr> <td style="font-size: small;">Penumbra</td> <td>Institutional Educational Grant</td> </tr> </table> | Stryker | Institutional Educational Grant | Medtronic | Institutional Educational Grant | Penumbra | Institutional Educational Grant           |
| Stryker                                                   | Institutional Educational Grant                                                                                                                                                |                                                                                                                                                                                                                                                                                                                                                                                                                                                                      |         |                                 |           |                                 |          |                                           |
| Medtronic                                                 | Institutional Educational Grant                                                                                                                                                |                                                                                                                                                                                                                                                                                                                                                                                                                                                                      |         |                                 |           |                                 |          |                                           |
| Penumbra                                                  | Institutional Educational Grant                                                                                                                                                |                                                                                                                                                                                                                                                                                                                                                                                                                                                                      |         |                                 |           |                                 |          |                                           |
| <b>3</b>                                                  | Royalties or licenses                                                                                                                                                          | <input checked="" type="checkbox"/> <b>None</b><br><table border="1" style="width: 100%; border-collapse: collapse; margin-top: 5px;"> <tr><td style="width: 50%; height: 15px;"></td><td style="width: 50%;"></td></tr> <tr><td style="height: 15px;"></td><td></td></tr> <tr><td style="height: 15px;"></td><td></td></tr> </table>                                                                                                                                |         |                                 |           |                                 |          |                                           |
|                                                           |                                                                                                                                                                                |                                                                                                                                                                                                                                                                                                                                                                                                                                                                      |         |                                 |           |                                 |          |                                           |
|                                                           |                                                                                                                                                                                |                                                                                                                                                                                                                                                                                                                                                                                                                                                                      |         |                                 |           |                                 |          |                                           |
|                                                           |                                                                                                                                                                                |                                                                                                                                                                                                                                                                                                                                                                                                                                                                      |         |                                 |           |                                 |          |                                           |

|                              |                                                                                                              | Name all entities with whom you have this relationship or indicate none (add rows as needed)                                                                                                                                           | Specifications/Comments (e.g., if payments were made to you or to your institution) |                         |         |                           |           |      |  |  |  |
|------------------------------|--------------------------------------------------------------------------------------------------------------|----------------------------------------------------------------------------------------------------------------------------------------------------------------------------------------------------------------------------------------|-------------------------------------------------------------------------------------|-------------------------|---------|---------------------------|-----------|------|--|--|--|
| 4                            | Consulting fees                                                                                              | <input type="checkbox"/> <b>None</b><br><table border="1"> <tr> <td>Microvention</td> <td>Educational Consultancy</td> </tr> <tr> <td></td> <td></td> </tr> <tr> <td></td> <td></td> </tr> <tr> <td></td> <td></td> </tr> </table>     | Microvention                                                                        | Educational Consultancy |         |                           |           |      |  |  |  |
| Microvention                 | Educational Consultancy                                                                                      |                                                                                                                                                                                                                                        |                                                                                     |                         |         |                           |           |      |  |  |  |
|                              |                                                                                                              |                                                                                                                                                                                                                                        |                                                                                     |                         |         |                           |           |      |  |  |  |
|                              |                                                                                                              |                                                                                                                                                                                                                                        |                                                                                     |                         |         |                           |           |      |  |  |  |
|                              |                                                                                                              |                                                                                                                                                                                                                                        |                                                                                     |                         |         |                           |           |      |  |  |  |
| 5                            | Payment or honoraria for lectures, presentations, speakers bureaus, manuscript writing or educational events | <input checked="" type="checkbox"/> <b>None</b><br><table border="1"> <tr> <td></td> <td></td> </tr> <tr> <td></td> <td></td> </tr> <tr> <td></td> <td></td> </tr> </table>                                                            |                                                                                     |                         |         |                           |           |      |  |  |  |
|                              |                                                                                                              |                                                                                                                                                                                                                                        |                                                                                     |                         |         |                           |           |      |  |  |  |
|                              |                                                                                                              |                                                                                                                                                                                                                                        |                                                                                     |                         |         |                           |           |      |  |  |  |
|                              |                                                                                                              |                                                                                                                                                                                                                                        |                                                                                     |                         |         |                           |           |      |  |  |  |
| 6                            | Payment for expert testimony                                                                                 | <input checked="" type="checkbox"/> <b>None</b><br><table border="1"> <tr> <td></td> <td></td> </tr> <tr> <td></td> <td></td> </tr> <tr> <td></td> <td></td> </tr> </table>                                                            |                                                                                     |                         |         |                           |           |      |  |  |  |
|                              |                                                                                                              |                                                                                                                                                                                                                                        |                                                                                     |                         |         |                           |           |      |  |  |  |
|                              |                                                                                                              |                                                                                                                                                                                                                                        |                                                                                     |                         |         |                           |           |      |  |  |  |
|                              |                                                                                                              |                                                                                                                                                                                                                                        |                                                                                     |                         |         |                           |           |      |  |  |  |
| 7                            | Support for attending meetings and/or travel                                                                 | <input checked="" type="checkbox"/> <b>None</b><br><table border="1"> <tr> <td></td> <td></td> </tr> <tr> <td></td> <td></td> </tr> <tr> <td></td> <td></td> </tr> </table>                                                            |                                                                                     |                         |         |                           |           |      |  |  |  |
|                              |                                                                                                              |                                                                                                                                                                                                                                        |                                                                                     |                         |         |                           |           |      |  |  |  |
|                              |                                                                                                              |                                                                                                                                                                                                                                        |                                                                                     |                         |         |                           |           |      |  |  |  |
|                              |                                                                                                              |                                                                                                                                                                                                                                        |                                                                                     |                         |         |                           |           |      |  |  |  |
| 8                            | Patents planned, issued or pending                                                                           | <input checked="" type="checkbox"/> <b>None</b><br><table border="1"> <tr> <td></td> <td></td> </tr> <tr> <td></td> <td></td> </tr> <tr> <td></td> <td></td> </tr> </table>                                                            |                                                                                     |                         |         |                           |           |      |  |  |  |
|                              |                                                                                                              |                                                                                                                                                                                                                                        |                                                                                     |                         |         |                           |           |      |  |  |  |
|                              |                                                                                                              |                                                                                                                                                                                                                                        |                                                                                     |                         |         |                           |           |      |  |  |  |
|                              |                                                                                                              |                                                                                                                                                                                                                                        |                                                                                     |                         |         |                           |           |      |  |  |  |
| 9                            | Participation on a Data Safety Monitoring Board or Advisory Board                                            | <input type="checkbox"/> <b>None</b><br><table border="1"> <tr> <td>MR CLEAN NoIV</td> <td>DMSB</td> </tr> <tr> <td>TENSION</td> <td>DMSB</td> </tr> <tr> <td>PROTECT-U</td> <td>DMSB</td> </tr> </table>                              | MR CLEAN NoIV                                                                       | DMSB                    | TENSION | DMSB                      | PROTECT-U | DMSB |  |  |  |
| MR CLEAN NoIV                | DMSB                                                                                                         |                                                                                                                                                                                                                                        |                                                                                     |                         |         |                           |           |      |  |  |  |
| TENSION                      | DMSB                                                                                                         |                                                                                                                                                                                                                                        |                                                                                     |                         |         |                           |           |      |  |  |  |
| PROTECT-U                    | DMSB                                                                                                         |                                                                                                                                                                                                                                        |                                                                                     |                         |         |                           |           |      |  |  |  |
| 10                           | Leadership or fiduciary role in other board, society, committee or advocacy group, paid or unpaid            | <input type="checkbox"/> <b>None</b><br><table border="1"> <tr> <td>UK Neurointerventional Group</td> <td>Chairperson</td> </tr> <tr> <td>ESMINT</td> <td>Education Committee Chair</td> </tr> <tr> <td></td> <td></td> </tr> </table> | UK Neurointerventional Group                                                        | Chairperson             | ESMINT  | Education Committee Chair |           |      |  |  |  |
| UK Neurointerventional Group | Chairperson                                                                                                  |                                                                                                                                                                                                                                        |                                                                                     |                         |         |                           |           |      |  |  |  |
| ESMINT                       | Education Committee Chair                                                                                    |                                                                                                                                                                                                                                        |                                                                                     |                         |         |                           |           |      |  |  |  |
|                              |                                                                                                              |                                                                                                                                                                                                                                        |                                                                                     |                         |         |                           |           |      |  |  |  |

|                                                                                                                                                                                                                                                               |                                                                                  | Name all entities with whom you have this relationship or indicate none (add rows as needed)                                                                                                                                                                                                                                                                       | Specifications/Comments (e.g., if payments were made to you or to your institution) |  |  |  |  |  |  |
|---------------------------------------------------------------------------------------------------------------------------------------------------------------------------------------------------------------------------------------------------------------|----------------------------------------------------------------------------------|--------------------------------------------------------------------------------------------------------------------------------------------------------------------------------------------------------------------------------------------------------------------------------------------------------------------------------------------------------------------|-------------------------------------------------------------------------------------|--|--|--|--|--|--|
| <b>11</b>                                                                                                                                                                                                                                                     | Stock or stock options                                                           | <input checked="" type="checkbox"/> <b>None</b><br><table border="1" style="width: 100%; border-collapse: collapse;"> <tr><td style="height: 20px;"> </td><td style="width: 50%;"> </td></tr> <tr><td style="height: 20px;"> </td><td> </td></tr> <tr><td style="height: 20px;"> </td><td> </td></tr> </table>                                                     |                                                                                     |  |  |  |  |  |  |
|                                                                                                                                                                                                                                                               |                                                                                  |                                                                                                                                                                                                                                                                                                                                                                    |                                                                                     |  |  |  |  |  |  |
|                                                                                                                                                                                                                                                               |                                                                                  |                                                                                                                                                                                                                                                                                                                                                                    |                                                                                     |  |  |  |  |  |  |
|                                                                                                                                                                                                                                                               |                                                                                  |                                                                                                                                                                                                                                                                                                                                                                    |                                                                                     |  |  |  |  |  |  |
| <b>12</b>                                                                                                                                                                                                                                                     | Receipt of equipment, materials, drugs, medical writing, gifts or other services | <input checked="" type="checkbox"/> <b>None</b><br><table border="1" style="width: 100%; border-collapse: collapse;"> <tr><td style="height: 20px;"> </td><td style="width: 50%;"> </td></tr> <tr><td style="height: 20px;"> </td><td> </td></tr> <tr><td style="height: 20px;"> </td><td> </td></tr> </table>                                                     |                                                                                     |  |  |  |  |  |  |
|                                                                                                                                                                                                                                                               |                                                                                  |                                                                                                                                                                                                                                                                                                                                                                    |                                                                                     |  |  |  |  |  |  |
|                                                                                                                                                                                                                                                               |                                                                                  |                                                                                                                                                                                                                                                                                                                                                                    |                                                                                     |  |  |  |  |  |  |
|                                                                                                                                                                                                                                                               |                                                                                  |                                                                                                                                                                                                                                                                                                                                                                    |                                                                                     |  |  |  |  |  |  |
| <b>13</b>                                                                                                                                                                                                                                                     | Other financial or non-financial interests                                       | <input type="checkbox"/> <b>None</b><br><table border="1" style="width: 100%; border-collapse: collapse;"> <tr> <td style="width: 50%;">Associate Editor for the Journal of Neurointerventional Surgery</td> <td style="width: 50%;"> </td> </tr> <tr><td style="height: 20px;"> </td><td> </td></tr> <tr><td style="height: 20px;"> </td><td> </td></tr> </table> | Associate Editor for the Journal of Neurointerventional Surgery                     |  |  |  |  |  |  |
| Associate Editor for the Journal of Neurointerventional Surgery                                                                                                                                                                                               |                                                                                  |                                                                                                                                                                                                                                                                                                                                                                    |                                                                                     |  |  |  |  |  |  |
|                                                                                                                                                                                                                                                               |                                                                                  |                                                                                                                                                                                                                                                                                                                                                                    |                                                                                     |  |  |  |  |  |  |
|                                                                                                                                                                                                                                                               |                                                                                  |                                                                                                                                                                                                                                                                                                                                                                    |                                                                                     |  |  |  |  |  |  |
| <p><b>Please place an "X" next to the following statement to indicate your agreement:</b></p> <p><input checked="" type="checkbox"/> I certify that I have answered every question and have not altered the wording of any of the questions on this form.</p> |                                                                                  |                                                                                                                                                                                                                                                                                                                                                                    |                                                                                     |  |  |  |  |  |  |

## ICMJE DISCLOSURE FORM

**Date:** 12/21/2021

**Your Name:** Heinrich J Audebert

**Manuscript Title:** European Stroke Organisation (ESO) - European Society for Minimally Invasive Neurological Therapy (ESMINT) expedited recommendation on intravenous thrombolysis before mechanical thrombectomy in patients with acute ischemic stroke

**Manuscript Number (if known):** neurintsurg-2021-018589

In the interest of transparency, we ask you to disclose all relationships/activities/interests listed below that are related to the content of your manuscript. "Related" means any relation with for-profit or not-for-profit third parties whose interests may be affected by the content of the manuscript. Disclosure represents a commitment to transparency and does not necessarily indicate a bias. If you are in doubt about whether to list a relationship/activity/interest, it is preferable that you do so.

The author's relationships/activities/interests should be defined broadly. For example, if your manuscript pertains to the epidemiology of hypertension, you should declare all relationships with manufacturers of antihypertensive medication, even if that medication is not mentioned in the manuscript.

In item #1 below, report all support for the work reported in this manuscript without time limit. For all other items, the time frame for disclosure is the past 36 months.

|                                                                   | Name all entities with whom you have this relationship or indicate none (add rows as needed)                                                                                   | Specifications/Comments (e.g., if payments were made to you or to your institution)                                                                                                                                                                                                                                                                                                                                                                                                                                                                       |                                                   |                                    |                                                                   |                               |  |                                           |
|-------------------------------------------------------------------|--------------------------------------------------------------------------------------------------------------------------------------------------------------------------------|-----------------------------------------------------------------------------------------------------------------------------------------------------------------------------------------------------------------------------------------------------------------------------------------------------------------------------------------------------------------------------------------------------------------------------------------------------------------------------------------------------------------------------------------------------------|---------------------------------------------------|------------------------------------|-------------------------------------------------------------------|-------------------------------|--|-------------------------------------------|
| <b>Time frame: Since the initial planning of the work</b>         |                                                                                                                                                                                |                                                                                                                                                                                                                                                                                                                                                                                                                                                                                                                                                           |                                                   |                                    |                                                                   |                               |  |                                           |
| <b>1</b>                                                          | All support for the present manuscript (e.g., funding, provision of study materials, medical writing, article processing charges, etc.)<br><b>No time limit for this item.</b> | <input checked="" type="checkbox"/> <b>None</b><br><table border="1" style="width: 100%; border-collapse: collapse; margin-top: 10px;"> <tr><td style="width: 60%; height: 20px;"></td><td style="width: 40%;"></td></tr> <tr><td style="height: 20px;"></td><td></td></tr> <tr><td style="height: 20px;"></td><td style="text-align: right; font-size: small;">Click the tab key to add additional rows.</td></tr> </table>                                                                                                                              |                                                   |                                    |                                                                   |                               |  | Click the tab key to add additional rows. |
|                                                                   |                                                                                                                                                                                |                                                                                                                                                                                                                                                                                                                                                                                                                                                                                                                                                           |                                                   |                                    |                                                                   |                               |  |                                           |
|                                                                   |                                                                                                                                                                                |                                                                                                                                                                                                                                                                                                                                                                                                                                                                                                                                                           |                                                   |                                    |                                                                   |                               |  |                                           |
|                                                                   | Click the tab key to add additional rows.                                                                                                                                      |                                                                                                                                                                                                                                                                                                                                                                                                                                                                                                                                                           |                                                   |                                    |                                                                   |                               |  |                                           |
| <b>Time frame: past 36 months</b>                                 |                                                                                                                                                                                |                                                                                                                                                                                                                                                                                                                                                                                                                                                                                                                                                           |                                                   |                                    |                                                                   |                               |  |                                           |
| <b>2</b>                                                          | Grants or contracts from any entity (if not indicated in item #1 above).                                                                                                       | <input type="checkbox"/> <b>None</b><br><table border="1" style="width: 100%; border-collapse: collapse; margin-top: 10px;"> <tr> <td style="width: 60%; padding: 2px;">Federal Ministry of Education and Research (BMBF)</td> <td style="width: 40%; padding: 2px;">Funding for the B-SPATiAL Registry</td> </tr> <tr> <td style="padding: 2px;">Deutsche Forschungsgemeinschaft (DFG, German Research Foundation)</td> <td style="padding: 2px;">Funding for the B_PROUD study</td> </tr> <tr> <td style="height: 20px;"></td> <td></td> </tr> </table> | Federal Ministry of Education and Research (BMBF) | Funding for the B-SPATiAL Registry | Deutsche Forschungsgemeinschaft (DFG, German Research Foundation) | Funding for the B_PROUD study |  |                                           |
| Federal Ministry of Education and Research (BMBF)                 | Funding for the B-SPATiAL Registry                                                                                                                                             |                                                                                                                                                                                                                                                                                                                                                                                                                                                                                                                                                           |                                                   |                                    |                                                                   |                               |  |                                           |
| Deutsche Forschungsgemeinschaft (DFG, German Research Foundation) | Funding for the B_PROUD study                                                                                                                                                  |                                                                                                                                                                                                                                                                                                                                                                                                                                                                                                                                                           |                                                   |                                    |                                                                   |                               |  |                                           |
|                                                                   |                                                                                                                                                                                |                                                                                                                                                                                                                                                                                                                                                                                                                                                                                                                                                           |                                                   |                                    |                                                                   |                               |  |                                           |

|          |                                                                                                              | <b>Name all entities with whom you have this relationship or indicate none (add rows as needed)</b> | <b>Specifications/Comments (e.g., if payments were made to you or to your institution)</b>                                                                                                                                                                                                                             |
|----------|--------------------------------------------------------------------------------------------------------------|-----------------------------------------------------------------------------------------------------|------------------------------------------------------------------------------------------------------------------------------------------------------------------------------------------------------------------------------------------------------------------------------------------------------------------------|
| <b>3</b> | Royalties or licenses                                                                                        | <input type="checkbox"/> <b>None</b>                                                                |                                                                                                                                                                                                                                                                                                                        |
|          |                                                                                                              | MEYTEC                                                                                              | Institutional share of Stroke Emergency Mobiles (STEMO) turnover from the STEMO manufacturer (Meytec GmbH) to Charité Universitätsmedizin Berlin, the author's employer, arising from previous public funding within the Berlin Zukunftsfonds. Not access to this money by Heinrich Audebert or related working groups |
|          |                                                                                                              |                                                                                                     |                                                                                                                                                                                                                                                                                                                        |
| <b>4</b> | Consulting fees                                                                                              | <input checked="" type="checkbox"/> <b>None</b>                                                     |                                                                                                                                                                                                                                                                                                                        |
|          |                                                                                                              |                                                                                                     |                                                                                                                                                                                                                                                                                                                        |
|          |                                                                                                              |                                                                                                     |                                                                                                                                                                                                                                                                                                                        |
|          |                                                                                                              |                                                                                                     |                                                                                                                                                                                                                                                                                                                        |
| <b>5</b> | Payment or honoraria for lectures, presentations, speakers bureaus, manuscript writing or educational events | <input type="checkbox"/> <b>None</b>                                                                |                                                                                                                                                                                                                                                                                                                        |
|          |                                                                                                              | Lundbeck                                                                                            | DMC activity                                                                                                                                                                                                                                                                                                           |
|          |                                                                                                              | Boehringer Ingelheim                                                                                |                                                                                                                                                                                                                                                                                                                        |
|          |                                                                                                              | Bayer Vital                                                                                         |                                                                                                                                                                                                                                                                                                                        |
|          |                                                                                                              | Bristol- Myers Squibb                                                                               |                                                                                                                                                                                                                                                                                                                        |
|          |                                                                                                              | Sanofi                                                                                              | Sanofi                                                                                                                                                                                                                                                                                                                 |
| <b>6</b> | Payment for expert testimony                                                                                 | <input checked="" type="checkbox"/> <b>None</b>                                                     |                                                                                                                                                                                                                                                                                                                        |
|          |                                                                                                              |                                                                                                     |                                                                                                                                                                                                                                                                                                                        |
|          |                                                                                                              |                                                                                                     |                                                                                                                                                                                                                                                                                                                        |
| <b>7</b> | Support for attending meetings and/or travel                                                                 | <input checked="" type="checkbox"/> <b>None</b>                                                     |                                                                                                                                                                                                                                                                                                                        |
|          |                                                                                                              |                                                                                                     |                                                                                                                                                                                                                                                                                                                        |
|          |                                                                                                              |                                                                                                     |                                                                                                                                                                                                                                                                                                                        |
| <b>8</b> | Patents planned, issued or pending                                                                           | <input checked="" type="checkbox"/> <b>None</b>                                                     |                                                                                                                                                                                                                                                                                                                        |
|          |                                                                                                              |                                                                                                     |                                                                                                                                                                                                                                                                                                                        |
|          |                                                                                                              |                                                                                                     |                                                                                                                                                                                                                                                                                                                        |
| <b>9</b> | Participation on a Data Safety Monitoring                                                                    | <input type="checkbox"/> <b>None</b>                                                                |                                                                                                                                                                                                                                                                                                                        |
|          |                                                                                                              | Novo Nordisk                                                                                        | Prevention trial                                                                                                                                                                                                                                                                                                       |



|                                                                                                                                                                                                                                                               |                                                                                                   | <b>Name all entities with whom you have this relationship or indicate none (add rows as needed)</b>                                                                                                                                                                                                      | <b>Specifications/Comments (e.g., if payments were made to you or to your institution)</b> |  |                                                                           |  |  |  |  |
|---------------------------------------------------------------------------------------------------------------------------------------------------------------------------------------------------------------------------------------------------------------|---------------------------------------------------------------------------------------------------|----------------------------------------------------------------------------------------------------------------------------------------------------------------------------------------------------------------------------------------------------------------------------------------------------------|--------------------------------------------------------------------------------------------|--|---------------------------------------------------------------------------|--|--|--|--|
|                                                                                                                                                                                                                                                               | Board or Advisory Board                                                                           |                                                                                                                                                                                                                                                                                                          |                                                                                            |  |                                                                           |  |  |  |  |
| <b>10</b>                                                                                                                                                                                                                                                     | Leadership or fiduciary role in other board, society, committee or advocacy group, paid or unpaid | <input type="checkbox"/> <b>None</b><br><table border="1"> <tr> <td>President elect in the Prehospital Stroke Organisation (PRESTO)</td> <td></td> </tr> <tr> <td>Chair of the Board of Directors of the European Stroke Organisation (ESO)</td> <td></td> </tr> <tr> <td></td> <td></td> </tr> </table> | President elect in the Prehospital Stroke Organisation (PRESTO)                            |  | Chair of the Board of Directors of the European Stroke Organisation (ESO) |  |  |  |  |
| President elect in the Prehospital Stroke Organisation (PRESTO)                                                                                                                                                                                               |                                                                                                   |                                                                                                                                                                                                                                                                                                          |                                                                                            |  |                                                                           |  |  |  |  |
| Chair of the Board of Directors of the European Stroke Organisation (ESO)                                                                                                                                                                                     |                                                                                                   |                                                                                                                                                                                                                                                                                                          |                                                                                            |  |                                                                           |  |  |  |  |
|                                                                                                                                                                                                                                                               |                                                                                                   |                                                                                                                                                                                                                                                                                                          |                                                                                            |  |                                                                           |  |  |  |  |
| <b>11</b>                                                                                                                                                                                                                                                     | Stock or stock options                                                                            | <input checked="" type="checkbox"/> <b>None</b><br><table border="1"> <tr><td></td><td></td></tr> <tr><td></td><td></td></tr> <tr><td></td><td></td></tr> </table>                                                                                                                                       |                                                                                            |  |                                                                           |  |  |  |  |
|                                                                                                                                                                                                                                                               |                                                                                                   |                                                                                                                                                                                                                                                                                                          |                                                                                            |  |                                                                           |  |  |  |  |
|                                                                                                                                                                                                                                                               |                                                                                                   |                                                                                                                                                                                                                                                                                                          |                                                                                            |  |                                                                           |  |  |  |  |
|                                                                                                                                                                                                                                                               |                                                                                                   |                                                                                                                                                                                                                                                                                                          |                                                                                            |  |                                                                           |  |  |  |  |
| <b>12</b>                                                                                                                                                                                                                                                     | Receipt of equipment, materials, drugs, medical writing, gifts or other services                  | <input checked="" type="checkbox"/> <b>None</b><br><table border="1"> <tr><td></td><td></td></tr> <tr><td></td><td></td></tr> <tr><td></td><td></td></tr> </table>                                                                                                                                       |                                                                                            |  |                                                                           |  |  |  |  |
|                                                                                                                                                                                                                                                               |                                                                                                   |                                                                                                                                                                                                                                                                                                          |                                                                                            |  |                                                                           |  |  |  |  |
|                                                                                                                                                                                                                                                               |                                                                                                   |                                                                                                                                                                                                                                                                                                          |                                                                                            |  |                                                                           |  |  |  |  |
|                                                                                                                                                                                                                                                               |                                                                                                   |                                                                                                                                                                                                                                                                                                          |                                                                                            |  |                                                                           |  |  |  |  |
| <b>13</b>                                                                                                                                                                                                                                                     | Other financial or non-financial interests                                                        | <input checked="" type="checkbox"/> <b>None</b><br><table border="1"> <tr><td></td><td></td></tr> <tr><td></td><td></td></tr> <tr><td></td><td></td></tr> </table>                                                                                                                                       |                                                                                            |  |                                                                           |  |  |  |  |
|                                                                                                                                                                                                                                                               |                                                                                                   |                                                                                                                                                                                                                                                                                                          |                                                                                            |  |                                                                           |  |  |  |  |
|                                                                                                                                                                                                                                                               |                                                                                                   |                                                                                                                                                                                                                                                                                                          |                                                                                            |  |                                                                           |  |  |  |  |
|                                                                                                                                                                                                                                                               |                                                                                                   |                                                                                                                                                                                                                                                                                                          |                                                                                            |  |                                                                           |  |  |  |  |
| <p><b>Please place an "X" next to the following statement to indicate your agreement:</b></p> <p><input checked="" type="checkbox"/> I certify that I have answered every question and have not altered the wording of any of the questions on this form.</p> |                                                                                                   |                                                                                                                                                                                                                                                                                                          |                                                                                            |  |                                                                           |  |  |  |  |

## ICMJE DISCLOSURE FORM

**Date:** 12/21/2021

**Your Name:** Pervinder Bhogal

**Manuscript Title:** European Stroke Organisation (ESO) - European Society for Minimally Invasive Neurological Therapy (ESMINT) expedited recommendation on intravenous thrombolysis before mechanical thrombectomy in patients with acute ischemic stroke

**Manuscript Number (if known):** neurintsurg-2021-018589

In the interest of transparency, we ask you to disclose all relationships/activities/interests listed below that are related to the content of your manuscript. "Related" means any relation with for-profit or not-for-profit third parties whose interests may be affected by the content of the manuscript. Disclosure represents a commitment to transparency and does not necessarily indicate a bias. If you are in doubt about whether to list a relationship/activity/interest, it is preferable that you do so.

The author's relationships/activities/interests should be defined broadly. For example, if your manuscript pertains to the epidemiology of hypertension, you should declare all relationships with manufacturers of antihypertensive medication, even if that medication is not mentioned in the manuscript.

In item #1 below, report all support for the work reported in this manuscript without time limit. For all other items, the time frame for disclosure is the past 36 months.

|                                                           | Name all entities with whom you have this relationship or indicate none (add rows as needed)                                                                                   | Specifications/Comments (e.g., if payments were made to you or to your institution)                                                                                                                                                                                                                                                                                                                                                                      |  |  |  |  |  |  |
|-----------------------------------------------------------|--------------------------------------------------------------------------------------------------------------------------------------------------------------------------------|----------------------------------------------------------------------------------------------------------------------------------------------------------------------------------------------------------------------------------------------------------------------------------------------------------------------------------------------------------------------------------------------------------------------------------------------------------|--|--|--|--|--|--|
| <b>Time frame: Since the initial planning of the work</b> |                                                                                                                                                                                |                                                                                                                                                                                                                                                                                                                                                                                                                                                          |  |  |  |  |  |  |
| <b>1</b>                                                  | All support for the present manuscript (e.g., funding, provision of study materials, medical writing, article processing charges, etc.)<br><b>No time limit for this item.</b> | <input checked="" type="checkbox"/> <b>None</b><br><table border="1" style="width: 100%; border-collapse: collapse; margin-top: 5px;"> <tr><td style="width: 60%; height: 15px;"></td><td style="width: 40%;"></td></tr> <tr><td style="height: 15px;"></td><td></td></tr> <tr><td style="height: 15px;"></td><td></td></tr> </table> <div style="text-align: right; font-size: small; margin-top: 5px;">Click the tab key to add additional rows.</div> |  |  |  |  |  |  |
|                                                           |                                                                                                                                                                                |                                                                                                                                                                                                                                                                                                                                                                                                                                                          |  |  |  |  |  |  |
|                                                           |                                                                                                                                                                                |                                                                                                                                                                                                                                                                                                                                                                                                                                                          |  |  |  |  |  |  |
|                                                           |                                                                                                                                                                                |                                                                                                                                                                                                                                                                                                                                                                                                                                                          |  |  |  |  |  |  |
| <b>Time frame: past 36 months</b>                         |                                                                                                                                                                                |                                                                                                                                                                                                                                                                                                                                                                                                                                                          |  |  |  |  |  |  |
| <b>2</b>                                                  | Grants or contracts from any entity (if not indicated in item #1 above).                                                                                                       | <input checked="" type="checkbox"/> <b>None</b><br><table border="1" style="width: 100%; border-collapse: collapse; margin-top: 5px;"> <tr><td style="width: 60%; height: 15px;"></td><td style="width: 40%;"></td></tr> <tr><td style="height: 15px;"></td><td></td></tr> <tr><td style="height: 15px;"></td><td></td></tr> </table>                                                                                                                    |  |  |  |  |  |  |
|                                                           |                                                                                                                                                                                |                                                                                                                                                                                                                                                                                                                                                                                                                                                          |  |  |  |  |  |  |
|                                                           |                                                                                                                                                                                |                                                                                                                                                                                                                                                                                                                                                                                                                                                          |  |  |  |  |  |  |
|                                                           |                                                                                                                                                                                |                                                                                                                                                                                                                                                                                                                                                                                                                                                          |  |  |  |  |  |  |

|           |                                                                                                              | Name all entities with whom you have this relationship or indicate none (add rows as needed) | Specifications/Comments (e.g., if payments were made to you or to your institution) |
|-----------|--------------------------------------------------------------------------------------------------------------|----------------------------------------------------------------------------------------------|-------------------------------------------------------------------------------------|
| <b>3</b>  | Royalties or licenses                                                                                        | <input checked="" type="checkbox"/> <b>None</b>                                              |                                                                                     |
|           |                                                                                                              |                                                                                              |                                                                                     |
|           |                                                                                                              |                                                                                              |                                                                                     |
| <b>4</b>  | Consulting fees                                                                                              | <input type="checkbox"/> <b>None</b>                                                         |                                                                                     |
|           |                                                                                                              | Neurovasc                                                                                    |                                                                                     |
|           |                                                                                                              | Brainomix                                                                                    |                                                                                     |
|           |                                                                                                              | Balt                                                                                         |                                                                                     |
|           |                                                                                                              | Phenox                                                                                       |                                                                                     |
| <b>5</b>  | Payment or honoraria for lectures, presentations, speakers bureaus, manuscript writing or educational events | <input type="checkbox"/> <b>None</b>                                                         |                                                                                     |
|           |                                                                                                              | Veaslio                                                                                      | Brain conference                                                                    |
|           |                                                                                                              | Perflow Medical                                                                              | WLNC                                                                                |
|           |                                                                                                              | Neurovasc                                                                                    | ICI Meeting                                                                         |
| <b>6</b>  | Payment for expert testimony                                                                                 | <input checked="" type="checkbox"/> <b>None</b>                                              |                                                                                     |
|           |                                                                                                              |                                                                                              |                                                                                     |
|           |                                                                                                              |                                                                                              |                                                                                     |
| <b>7</b>  | Support for attending meetings and/or travel                                                                 | <input type="checkbox"/> <b>None</b>                                                         |                                                                                     |
|           |                                                                                                              | Phenox                                                                                       | Attending ABC WIN                                                                   |
|           |                                                                                                              |                                                                                              |                                                                                     |
| <b>8</b>  | Patents planned, issued or pending                                                                           | <input checked="" type="checkbox"/> <b>None</b>                                              |                                                                                     |
|           |                                                                                                              |                                                                                              |                                                                                     |
|           |                                                                                                              |                                                                                              |                                                                                     |
| <b>9</b>  | Participation on a Data Safety Monitoring Board or Advisory Board                                            | <input type="checkbox"/> <b>None</b>                                                         |                                                                                     |
|           |                                                                                                              | Spartan Medical (Scientific advisory board)                                                  | unpaid                                                                              |
|           |                                                                                                              |                                                                                              |                                                                                     |
| <b>10</b> | Leadership or fiduciary role in other board, society,                                                        | <input type="checkbox"/> <b>None</b>                                                         |                                                                                     |
|           |                                                                                                              | BRAIN Conference                                                                             |                                                                                     |
|           |                                                                                                              |                                                                                              |                                                                                     |

|                                                                                                                                                                                                                                                               |                                                                                  | <b>Name all entities with whom you have this relationship or indicate none (add rows as needed)</b> | <b>Specifications/Comments (e.g., if payments were made to you or to your institution)</b> |
|---------------------------------------------------------------------------------------------------------------------------------------------------------------------------------------------------------------------------------------------------------------|----------------------------------------------------------------------------------|-----------------------------------------------------------------------------------------------------|--------------------------------------------------------------------------------------------|
|                                                                                                                                                                                                                                                               | committee or advocacy group, paid or unpaid                                      |                                                                                                     |                                                                                            |
| <b>1</b>                                                                                                                                                                                                                                                      | Stock or stock options                                                           | <input type="checkbox"/> <b>None</b>                                                                |                                                                                            |
| <b>1</b>                                                                                                                                                                                                                                                      |                                                                                  | Perfuzo                                                                                             |                                                                                            |
|                                                                                                                                                                                                                                                               |                                                                                  | Spartan Medical                                                                                     |                                                                                            |
| <b>1</b>                                                                                                                                                                                                                                                      | Receipt of equipment, materials, drugs, medical writing, gifts or other services | <input checked="" type="checkbox"/> <b>None</b>                                                     |                                                                                            |
| <b>2</b>                                                                                                                                                                                                                                                      |                                                                                  |                                                                                                     |                                                                                            |
|                                                                                                                                                                                                                                                               |                                                                                  |                                                                                                     |                                                                                            |
| <b>1</b>                                                                                                                                                                                                                                                      | Other financial or non-financial interests                                       | <input checked="" type="checkbox"/> <b>None</b>                                                     |                                                                                            |
| <b>3</b>                                                                                                                                                                                                                                                      |                                                                                  |                                                                                                     |                                                                                            |
|                                                                                                                                                                                                                                                               |                                                                                  |                                                                                                     |                                                                                            |
| <p><b>Please place an "X" next to the following statement to indicate your agreement:</b></p> <p><input checked="" type="checkbox"/> I certify that I have answered every question and have not altered the wording of any of the questions on this form.</p> |                                                                                  |                                                                                                     |                                                                                            |

## ICMJE DISCLOSURE FORM

**Date:** 12/21/2021

**Your Name:** H.D. Boogaarts

**Manuscript Title:** European Stroke Organisation (ESO) - European Society for Minimally Invasive Neurological Therapy (ESMINT) expedited recommendation on intravenous thrombolysis before mechanical thrombectomy in patients with acute ischemic stroke

**Manuscript Number (if known):** neurintsurg-2021-018589

In the interest of transparency, we ask you to disclose all relationships/activities/interests listed below that are related to the content of your manuscript. "Related" means any relation with for-profit or not-for-profit third parties whose interests may be affected by the content of the manuscript. Disclosure represents a commitment to transparency and does not necessarily indicate a bias. If you are in doubt about whether to list a relationship/activity/interest, it is preferable that you do so.

The author's relationships/activities/interests should be defined broadly. For example, if your manuscript pertains to the epidemiology of hypertension, you should declare all relationships with manufacturers of antihypertensive medication, even if that medication is not mentioned in the manuscript.

In item #1 below, report all support for the work reported in this manuscript without time limit. For all other items, the time frame for disclosure is the past 36 months.

|                                                           | Name all entities with whom you have this relationship or indicate none (add rows as needed)                                                                                   | Specifications/Comments (e.g., if payments were made to you or to your institution)                                                                                                                                                                                                                                                                                                                                               |  |  |  |  |  |  |
|-----------------------------------------------------------|--------------------------------------------------------------------------------------------------------------------------------------------------------------------------------|-----------------------------------------------------------------------------------------------------------------------------------------------------------------------------------------------------------------------------------------------------------------------------------------------------------------------------------------------------------------------------------------------------------------------------------|--|--|--|--|--|--|
| <b>Time frame: Since the initial planning of the work</b> |                                                                                                                                                                                |                                                                                                                                                                                                                                                                                                                                                                                                                                   |  |  |  |  |  |  |
| <b>1</b>                                                  | All support for the present manuscript (e.g., funding, provision of study materials, medical writing, article processing charges, etc.)<br><b>No time limit for this item.</b> | <input checked="" type="checkbox"/> <b>None</b><br><table border="1" style="width: 100%; border-collapse: collapse; margin-top: 5px;"> <tr><td style="width: 60%; height: 20px;"></td><td style="width: 40%;"></td></tr> <tr><td style="height: 20px;"></td><td></td></tr> <tr><td style="height: 20px;"></td><td></td></tr> </table> <p style="font-size: small; margin-top: 5px;">Click the tab key to add additional rows.</p> |  |  |  |  |  |  |
|                                                           |                                                                                                                                                                                |                                                                                                                                                                                                                                                                                                                                                                                                                                   |  |  |  |  |  |  |
|                                                           |                                                                                                                                                                                |                                                                                                                                                                                                                                                                                                                                                                                                                                   |  |  |  |  |  |  |
|                                                           |                                                                                                                                                                                |                                                                                                                                                                                                                                                                                                                                                                                                                                   |  |  |  |  |  |  |
| <b>Time frame: past 36 months</b>                         |                                                                                                                                                                                |                                                                                                                                                                                                                                                                                                                                                                                                                                   |  |  |  |  |  |  |
| <b>2</b>                                                  | Grants or contracts from any entity (if not indicated in item #1 above).                                                                                                       | <input checked="" type="checkbox"/> <b>None</b><br><table border="1" style="width: 100%; border-collapse: collapse; margin-top: 5px;"> <tr><td style="width: 60%; height: 20px;"></td><td style="width: 40%;"></td></tr> <tr><td style="height: 20px;"></td><td></td></tr> <tr><td style="height: 20px;"></td><td></td></tr> </table>                                                                                             |  |  |  |  |  |  |
|                                                           |                                                                                                                                                                                |                                                                                                                                                                                                                                                                                                                                                                                                                                   |  |  |  |  |  |  |
|                                                           |                                                                                                                                                                                |                                                                                                                                                                                                                                                                                                                                                                                                                                   |  |  |  |  |  |  |
|                                                           |                                                                                                                                                                                |                                                                                                                                                                                                                                                                                                                                                                                                                                   |  |  |  |  |  |  |

|          |                                                                                                              | <b>Name all entities with whom you have this relationship or indicate none (add rows as needed)</b>                                              | <b>Specifications/Comments (e.g., if payments were made to you or to your institution)</b> |
|----------|--------------------------------------------------------------------------------------------------------------|--------------------------------------------------------------------------------------------------------------------------------------------------|--------------------------------------------------------------------------------------------|
| <b>3</b> | Royalties or licenses                                                                                        | <input checked="" type="checkbox"/> <b>None</b>                                                                                                  |                                                                                            |
|          |                                                                                                              |                                                                                                                                                  |                                                                                            |
|          |                                                                                                              |                                                                                                                                                  |                                                                                            |
| <b>4</b> | Consulting fees                                                                                              | <input type="checkbox"/> <b>None</b>                                                                                                             |                                                                                            |
|          |                                                                                                              | Consultant for stryker neurovascular. Fees paid to the department of Neurosurgery, Radboud University Medical Center, Nijmegen, The Netherlands. |                                                                                            |
|          |                                                                                                              |                                                                                                                                                  |                                                                                            |
|          |                                                                                                              |                                                                                                                                                  |                                                                                            |
| <b>5</b> | Payment or honoraria for lectures, presentations, speakers bureaus, manuscript writing or educational events | <input checked="" type="checkbox"/> <b>None</b>                                                                                                  |                                                                                            |
|          |                                                                                                              |                                                                                                                                                  |                                                                                            |
|          |                                                                                                              |                                                                                                                                                  |                                                                                            |
| <b>6</b> | Payment for expert testimony                                                                                 | <input checked="" type="checkbox"/> <b>None</b>                                                                                                  |                                                                                            |
|          |                                                                                                              |                                                                                                                                                  |                                                                                            |
|          |                                                                                                              |                                                                                                                                                  |                                                                                            |
| <b>7</b> | Support for attending meetings and/or travel                                                                 | <input checked="" type="checkbox"/> <b>None</b>                                                                                                  |                                                                                            |
|          |                                                                                                              |                                                                                                                                                  |                                                                                            |
|          |                                                                                                              |                                                                                                                                                  |                                                                                            |
| <b>8</b> | Patents planned, issued or pending                                                                           | <input checked="" type="checkbox"/> <b>None</b>                                                                                                  |                                                                                            |
|          |                                                                                                              |                                                                                                                                                  |                                                                                            |
|          |                                                                                                              |                                                                                                                                                  |                                                                                            |
| <b>9</b> | Participation on a Data Safety Monitoring Board or Advisory Board                                            | <input checked="" type="checkbox"/> <b>None</b>                                                                                                  |                                                                                            |
|          |                                                                                                              |                                                                                                                                                  |                                                                                            |
|          |                                                                                                              |                                                                                                                                                  |                                                                                            |
| <b>1</b> | Leadership or                                                                                                | <input type="checkbox"/> <b>None</b>                                                                                                             |                                                                                            |

|                      |                                                                                     | <b>Name all entities with whom you have this relationship or indicate none (add rows as needed)</b> | <b>Specifications/Comments (e.g., if payments were made to you or to your institution)</b> |
|----------------------|-------------------------------------------------------------------------------------|-----------------------------------------------------------------------------------------------------|--------------------------------------------------------------------------------------------|
| <b>0</b>             | fiduciary role in other board, society, committee or advocacy group, paid or unpaid | Panel member of EANS vascular section                                                               |                                                                                            |
|                      |                                                                                     |                                                                                                     |                                                                                            |
|                      |                                                                                     |                                                                                                     |                                                                                            |
| <b>1</b><br><b>1</b> | Stock or stock options                                                              | <input checked="" type="checkbox"/> <b>None</b>                                                     |                                                                                            |
|                      |                                                                                     |                                                                                                     |                                                                                            |
|                      |                                                                                     |                                                                                                     |                                                                                            |
| <b>1</b><br><b>2</b> | Receipt of equipment, materials, drugs, medical writing, gifts or other services    | <input checked="" type="checkbox"/> <b>None</b>                                                     |                                                                                            |
|                      |                                                                                     |                                                                                                     |                                                                                            |
|                      |                                                                                     |                                                                                                     |                                                                                            |
| <b>1</b><br><b>3</b> | Other financial or non-financial interests                                          | <input checked="" type="checkbox"/> <b>None</b>                                                     |                                                                                            |
|                      |                                                                                     |                                                                                                     |                                                                                            |
|                      |                                                                                     |                                                                                                     |                                                                                            |

**Please place an "X" next to the following statement to indicate your agreement:**

I certify that I have answered every question and have not altered the wording of any of the questions on this form.

## ICMJE DISCLOSURE FORM

**Date:** 12/21/2021

**Your Name:** Gian Marco De Marchis

**Manuscript Title:** European Stroke Organisation (ESO) - European Society for Minimally Invasive Neurological Therapy (ESMINT) expedited recommendation on intravenous thrombolysis before mechanical thrombectomy in patients with acute ischemic stroke

**Manuscript Number (if known):** neurintsurg-2021-018589

In the interest of transparency, we ask you to disclose all relationships/activities/interests listed below that are related to the content of your manuscript. "Related" means any relation with for-profit or not-for-profit third parties whose interests may be affected by the content of the manuscript. Disclosure represents a commitment to transparency and does not necessarily indicate a bias. If you are in doubt about whether to list a relationship/activity/interest, it is preferable that you do so.

The author's relationships/activities/interests should be defined broadly. For example, if your manuscript pertains to the epidemiology of hypertension, you should declare all relationships with manufacturers of antihypertensive medication, even if that medication is not mentioned in the manuscript.

In item #1 below, report all support for the work reported in this manuscript without time limit. For all other items, the time frame for disclosure is the past 36 months.

|                                                                                                    |                                                                                                                                                                                | Name all entities with whom you have this relationship or indicate none (add rows as needed)                                                                                                                                                                                                      | Specifications/Comments (e.g., if payments were made to you or to your institution)                |  |  |  |  |  |                                           |
|----------------------------------------------------------------------------------------------------|--------------------------------------------------------------------------------------------------------------------------------------------------------------------------------|---------------------------------------------------------------------------------------------------------------------------------------------------------------------------------------------------------------------------------------------------------------------------------------------------|----------------------------------------------------------------------------------------------------|--|--|--|--|--|-------------------------------------------|
| <b>Time frame: Since the initial planning of the work</b>                                          |                                                                                                                                                                                |                                                                                                                                                                                                                                                                                                   |                                                                                                    |  |  |  |  |  |                                           |
| <b>1</b>                                                                                           | All support for the present manuscript (e.g., funding, provision of study materials, medical writing, article processing charges, etc.)<br><b>No time limit for this item.</b> | <input checked="" type="checkbox"/> <b>None</b><br><table border="1" style="width: 100%; height: 40px;"> <tr><td> </td><td> </td></tr> <tr><td> </td><td> </td></tr> <tr><td> </td><td> </td></tr> </table>                                                                                       |                                                                                                    |  |  |  |  |  | Click the tab key to add additional rows. |
|                                                                                                    |                                                                                                                                                                                |                                                                                                                                                                                                                                                                                                   |                                                                                                    |  |  |  |  |  |                                           |
|                                                                                                    |                                                                                                                                                                                |                                                                                                                                                                                                                                                                                                   |                                                                                                    |  |  |  |  |  |                                           |
|                                                                                                    |                                                                                                                                                                                |                                                                                                                                                                                                                                                                                                   |                                                                                                    |  |  |  |  |  |                                           |
| <b>Time frame: past 36 months</b>                                                                  |                                                                                                                                                                                |                                                                                                                                                                                                                                                                                                   |                                                                                                    |  |  |  |  |  |                                           |
| <b>2</b>                                                                                           | Grants or contracts from any entity (if not indicated in item #1 above).                                                                                                       | <input type="checkbox"/> <b>None</b><br><table border="1" style="width: 100%; height: 40px;"> <tr><td>Steering Committee Member of the TWIST trial, testing Tenecteplase in Patients with Wake-Up Stroke</td><td> </td></tr> <tr><td> </td><td> </td></tr> <tr><td> </td><td> </td></tr> </table> | Steering Committee Member of the TWIST trial, testing Tenecteplase in Patients with Wake-Up Stroke |  |  |  |  |  |                                           |
| Steering Committee Member of the TWIST trial, testing Tenecteplase in Patients with Wake-Up Stroke |                                                                                                                                                                                |                                                                                                                                                                                                                                                                                                   |                                                                                                    |  |  |  |  |  |                                           |
|                                                                                                    |                                                                                                                                                                                |                                                                                                                                                                                                                                                                                                   |                                                                                                    |  |  |  |  |  |                                           |
|                                                                                                    |                                                                                                                                                                                |                                                                                                                                                                                                                                                                                                   |                                                                                                    |  |  |  |  |  |                                           |



|           |                                                                                                              | <b>Name all entities with whom you have this relationship or indicate none (add rows as needed)</b>                                                                                                                                                                                                               | <b>Specifications/Comments (e.g., if payments were made to you or to your institution)</b> |  |  |  |  |  |  |
|-----------|--------------------------------------------------------------------------------------------------------------|-------------------------------------------------------------------------------------------------------------------------------------------------------------------------------------------------------------------------------------------------------------------------------------------------------------------|--------------------------------------------------------------------------------------------|--|--|--|--|--|--|
| <b>3</b>  | Royalties or licenses                                                                                        | <input checked="" type="checkbox"/> <b>None</b><br><table border="1" style="width:100%; border-collapse: collapse;"> <tr><td style="width:50%; height: 15px;"></td><td style="width:50%;"></td></tr> <tr><td style="height: 15px;"></td><td></td></tr> <tr><td style="height: 15px;"></td><td></td></tr> </table> |                                                                                            |  |  |  |  |  |  |
|           |                                                                                                              |                                                                                                                                                                                                                                                                                                                   |                                                                                            |  |  |  |  |  |  |
|           |                                                                                                              |                                                                                                                                                                                                                                                                                                                   |                                                                                            |  |  |  |  |  |  |
|           |                                                                                                              |                                                                                                                                                                                                                                                                                                                   |                                                                                            |  |  |  |  |  |  |
| <b>4</b>  | Consulting fees                                                                                              | <input checked="" type="checkbox"/> <b>None</b><br><table border="1" style="width:100%; border-collapse: collapse;"> <tr><td style="width:50%; height: 15px;"></td><td style="width:50%;"></td></tr> <tr><td style="height: 15px;"></td><td></td></tr> <tr><td style="height: 15px;"></td><td></td></tr> </table> |                                                                                            |  |  |  |  |  |  |
|           |                                                                                                              |                                                                                                                                                                                                                                                                                                                   |                                                                                            |  |  |  |  |  |  |
|           |                                                                                                              |                                                                                                                                                                                                                                                                                                                   |                                                                                            |  |  |  |  |  |  |
|           |                                                                                                              |                                                                                                                                                                                                                                                                                                                   |                                                                                            |  |  |  |  |  |  |
| <b>5</b>  | Payment or honoraria for lectures, presentations, speakers bureaus, manuscript writing or educational events | <input checked="" type="checkbox"/> <b>None</b><br><table border="1" style="width:100%; border-collapse: collapse;"> <tr><td style="width:50%; height: 15px;"></td><td style="width:50%;"></td></tr> <tr><td style="height: 15px;"></td><td></td></tr> <tr><td style="height: 15px;"></td><td></td></tr> </table> |                                                                                            |  |  |  |  |  |  |
|           |                                                                                                              |                                                                                                                                                                                                                                                                                                                   |                                                                                            |  |  |  |  |  |  |
|           |                                                                                                              |                                                                                                                                                                                                                                                                                                                   |                                                                                            |  |  |  |  |  |  |
|           |                                                                                                              |                                                                                                                                                                                                                                                                                                                   |                                                                                            |  |  |  |  |  |  |
| <b>6</b>  | Payment for expert testimony                                                                                 | <input checked="" type="checkbox"/> <b>None</b><br><table border="1" style="width:100%; border-collapse: collapse;"> <tr><td style="width:50%; height: 15px;"></td><td style="width:50%;"></td></tr> <tr><td style="height: 15px;"></td><td></td></tr> <tr><td style="height: 15px;"></td><td></td></tr> </table> |                                                                                            |  |  |  |  |  |  |
|           |                                                                                                              |                                                                                                                                                                                                                                                                                                                   |                                                                                            |  |  |  |  |  |  |
|           |                                                                                                              |                                                                                                                                                                                                                                                                                                                   |                                                                                            |  |  |  |  |  |  |
|           |                                                                                                              |                                                                                                                                                                                                                                                                                                                   |                                                                                            |  |  |  |  |  |  |
| <b>7</b>  | Support for attending meetings and/or travel                                                                 | <input checked="" type="checkbox"/> <b>None</b><br><table border="1" style="width:100%; border-collapse: collapse;"> <tr><td style="width:50%; height: 15px;"></td><td style="width:50%;"></td></tr> <tr><td style="height: 15px;"></td><td></td></tr> <tr><td style="height: 15px;"></td><td></td></tr> </table> |                                                                                            |  |  |  |  |  |  |
|           |                                                                                                              |                                                                                                                                                                                                                                                                                                                   |                                                                                            |  |  |  |  |  |  |
|           |                                                                                                              |                                                                                                                                                                                                                                                                                                                   |                                                                                            |  |  |  |  |  |  |
|           |                                                                                                              |                                                                                                                                                                                                                                                                                                                   |                                                                                            |  |  |  |  |  |  |
| <b>8</b>  | Patents planned, issued or pending                                                                           | <input checked="" type="checkbox"/> <b>None</b><br><table border="1" style="width:100%; border-collapse: collapse;"> <tr><td style="width:50%; height: 15px;"></td><td style="width:50%;"></td></tr> <tr><td style="height: 15px;"></td><td></td></tr> <tr><td style="height: 15px;"></td><td></td></tr> </table> |                                                                                            |  |  |  |  |  |  |
|           |                                                                                                              |                                                                                                                                                                                                                                                                                                                   |                                                                                            |  |  |  |  |  |  |
|           |                                                                                                              |                                                                                                                                                                                                                                                                                                                   |                                                                                            |  |  |  |  |  |  |
|           |                                                                                                              |                                                                                                                                                                                                                                                                                                                   |                                                                                            |  |  |  |  |  |  |
| <b>9</b>  | Participation on a Data Safety Monitoring Board or Advisory Board                                            | <input checked="" type="checkbox"/> <b>None</b><br><table border="1" style="width:100%; border-collapse: collapse;"> <tr><td style="width:50%; height: 15px;"></td><td style="width:50%;"></td></tr> <tr><td style="height: 15px;"></td><td></td></tr> <tr><td style="height: 15px;"></td><td></td></tr> </table> |                                                                                            |  |  |  |  |  |  |
|           |                                                                                                              |                                                                                                                                                                                                                                                                                                                   |                                                                                            |  |  |  |  |  |  |
|           |                                                                                                              |                                                                                                                                                                                                                                                                                                                   |                                                                                            |  |  |  |  |  |  |
|           |                                                                                                              |                                                                                                                                                                                                                                                                                                                   |                                                                                            |  |  |  |  |  |  |
| <b>10</b> | Leadership or fiduciary role in other board, society,                                                        | <input checked="" type="checkbox"/> <b>None</b><br><table border="1" style="width:100%; border-collapse: collapse;"> <tr><td style="width:50%; height: 15px;"></td><td style="width:50%;"></td></tr> <tr><td style="height: 15px;"></td><td></td></tr> <tr><td style="height: 15px;"></td><td></td></tr> </table> |                                                                                            |  |  |  |  |  |  |
|           |                                                                                                              |                                                                                                                                                                                                                                                                                                                   |                                                                                            |  |  |  |  |  |  |
|           |                                                                                                              |                                                                                                                                                                                                                                                                                                                   |                                                                                            |  |  |  |  |  |  |
|           |                                                                                                              |                                                                                                                                                                                                                                                                                                                   |                                                                                            |  |  |  |  |  |  |

|                                                                                                                                                                                                                                                               |                                                                                  | <b>Name all entities with whom you have this relationship or indicate none (add rows as needed)</b> | <b>Specifications/Comments (e.g., if payments were made to you or to your institution)</b> |
|---------------------------------------------------------------------------------------------------------------------------------------------------------------------------------------------------------------------------------------------------------------|----------------------------------------------------------------------------------|-----------------------------------------------------------------------------------------------------|--------------------------------------------------------------------------------------------|
|                                                                                                                                                                                                                                                               | committee or advocacy group, paid or unpaid                                      |                                                                                                     |                                                                                            |
| <b>1</b>                                                                                                                                                                                                                                                      | Stock or stock options                                                           | <input checked="" type="checkbox"/> <b>None</b>                                                     |                                                                                            |
| <b>1</b>                                                                                                                                                                                                                                                      |                                                                                  |                                                                                                     |                                                                                            |
| <b>1</b>                                                                                                                                                                                                                                                      | Receipt of equipment, materials, drugs, medical writing, gifts or other services | <input checked="" type="checkbox"/> <b>None</b>                                                     |                                                                                            |
| <b>2</b>                                                                                                                                                                                                                                                      |                                                                                  |                                                                                                     |                                                                                            |
| <b>1</b>                                                                                                                                                                                                                                                      | Other financial or non-financial interests                                       | <input checked="" type="checkbox"/> <b>None</b>                                                     |                                                                                            |
| <b>3</b>                                                                                                                                                                                                                                                      |                                                                                  |                                                                                                     |                                                                                            |
| <p><b>Please place an "X" next to the following statement to indicate your agreement:</b></p> <p><input checked="" type="checkbox"/> I certify that I have answered every question and have not altered the wording of any of the questions on this form.</p> |                                                                                  |                                                                                                     |                                                                                            |

**ICMJE DISCLOSURE FORM**

**Date:** 12/21/2021

**Your Name:** Jens Fiehler

**Manuscript Title:** European Stroke Organisation (ESO) - European Society for Minimally Invasive Neurological Therapy (ESMINT) expedited recommendation on intravenous thrombolysis before mechanical thrombectomy in patients with acute ischemic stroke

**Manuscript Number (if known):** neurintsurg-2021-018589

In the interest of transparency, we ask you to disclose all relationships/activities/interests listed below that are related to the content of your manuscript. "Related" means any relation with for-profit or not-for-profit third parties whose interests may be affected by the content of the manuscript. Disclosure represents a commitment to transparency and does not necessarily indicate a bias. If you are in doubt about whether to list a relationship/activity/interest, it is preferable that you do so.

The author's relationships/activities/interests should be defined broadly. For example, if your manuscript pertains to the epidemiology of hypertension, you should declare all relationships with manufacturers of antihypertensive medication, even if that medication is not mentioned in the manuscript.

In item #1 below, report all support for the work reported in this manuscript without time limit. For all other items, the time frame for disclosure is the past 36 months.

|                                                                                                                                                                                                                                                      |                                                                                                                                                                                | <b>Name all entities with whom you have this relationship or indicate none (add rows as needed)</b>                                                                                                                                                                                                                                                                                      | <b>Specifications/Comments (e.g., if payments were made to you or to your institution)</b>                                                                                                                                                           |  |  |  |  |  |                                           |
|------------------------------------------------------------------------------------------------------------------------------------------------------------------------------------------------------------------------------------------------------|--------------------------------------------------------------------------------------------------------------------------------------------------------------------------------|------------------------------------------------------------------------------------------------------------------------------------------------------------------------------------------------------------------------------------------------------------------------------------------------------------------------------------------------------------------------------------------|------------------------------------------------------------------------------------------------------------------------------------------------------------------------------------------------------------------------------------------------------|--|--|--|--|--|-------------------------------------------|
| <b>Time frame: Since the initial planning of the work</b>                                                                                                                                                                                            |                                                                                                                                                                                |                                                                                                                                                                                                                                                                                                                                                                                          |                                                                                                                                                                                                                                                      |  |  |  |  |  |                                           |
| <b>1</b>                                                                                                                                                                                                                                             | All support for the present manuscript (e.g., funding, provision of study materials, medical writing, article processing charges, etc.)<br><b>No time limit for this item.</b> | <input checked="" type="checkbox"/> <b>None</b><br><table border="1" style="width: 100%; height: 40px;"> <tr><td> </td><td> </td></tr> <tr><td> </td><td> </td></tr> <tr><td> </td><td> </td></tr> </table>                                                                                                                                                                              |                                                                                                                                                                                                                                                      |  |  |  |  |  | Click the tab key to add additional rows. |
|                                                                                                                                                                                                                                                      |                                                                                                                                                                                |                                                                                                                                                                                                                                                                                                                                                                                          |                                                                                                                                                                                                                                                      |  |  |  |  |  |                                           |
|                                                                                                                                                                                                                                                      |                                                                                                                                                                                |                                                                                                                                                                                                                                                                                                                                                                                          |                                                                                                                                                                                                                                                      |  |  |  |  |  |                                           |
|                                                                                                                                                                                                                                                      |                                                                                                                                                                                |                                                                                                                                                                                                                                                                                                                                                                                          |                                                                                                                                                                                                                                                      |  |  |  |  |  |                                           |
| <b>Time frame: past 36 months</b>                                                                                                                                                                                                                    |                                                                                                                                                                                |                                                                                                                                                                                                                                                                                                                                                                                          |                                                                                                                                                                                                                                                      |  |  |  |  |  |                                           |
| <b>2</b>                                                                                                                                                                                                                                             | Grants or contracts from any entity (if not indicated in item #1 above).                                                                                                       | <input type="checkbox"/> <b>None</b><br><table border="1" style="width: 100%; height: 100px;"> <tr><td>German Ministry of Science and Education (BMBF), German Ministry of Economy and Innovation (BMWi), German Research Foundation (DFG), European Union (EU), Hamburgische Investitions- und Förderbank (IFB), Medtronic, Microvention, Route92, Stryker</td><td> </td></tr> </table> | German Ministry of Science and Education (BMBF), German Ministry of Economy and Innovation (BMWi), German Research Foundation (DFG), European Union (EU), Hamburgische Investitions- und Förderbank (IFB), Medtronic, Microvention, Route92, Stryker |  |  |  |  |  |                                           |
| German Ministry of Science and Education (BMBF), German Ministry of Economy and Innovation (BMWi), German Research Foundation (DFG), European Union (EU), Hamburgische Investitions- und Förderbank (IFB), Medtronic, Microvention, Route92, Stryker |                                                                                                                                                                                |                                                                                                                                                                                                                                                                                                                                                                                          |                                                                                                                                                                                                                                                      |  |  |  |  |  |                                           |

|          |                                                                                                              | <b>Name all entities with whom you have this relationship or indicate none (add rows as needed)</b> | <b>Specifications/Comments (e.g., if payments were made to you or to your institution)</b> |
|----------|--------------------------------------------------------------------------------------------------------------|-----------------------------------------------------------------------------------------------------|--------------------------------------------------------------------------------------------|
|          |                                                                                                              |                                                                                                     |                                                                                            |
| <b>3</b> | Royalties or licenses                                                                                        | <input checked="" type="checkbox"/> <b>None</b>                                                     |                                                                                            |
|          |                                                                                                              |                                                                                                     |                                                                                            |
| <b>4</b> | Consulting fees                                                                                              | <input type="checkbox"/> <b>None</b>                                                                |                                                                                            |
|          |                                                                                                              | Acandis, Cerenovus, Medtronic, Microvention, Penumbra, Phenox, Stryker                              |                                                                                            |
|          |                                                                                                              |                                                                                                     |                                                                                            |
| <b>5</b> | Payment or honoraria for lectures, presentations, speakers bureaus, manuscript writing or educational events | <input checked="" type="checkbox"/> <b>None</b>                                                     |                                                                                            |
|          |                                                                                                              |                                                                                                     |                                                                                            |
| <b>6</b> | Payment for expert testimony                                                                                 | <input checked="" type="checkbox"/> <b>None</b>                                                     |                                                                                            |
|          |                                                                                                              |                                                                                                     |                                                                                            |
| <b>7</b> | Support for attending meetings and/or travel                                                                 | <input checked="" type="checkbox"/> <b>None</b>                                                     |                                                                                            |
|          |                                                                                                              |                                                                                                     |                                                                                            |
| <b>8</b> | Patents planned, issued or pending                                                                           | <input checked="" type="checkbox"/> <b>None</b>                                                     |                                                                                            |
|          |                                                                                                              |                                                                                                     |                                                                                            |
| <b>9</b> | Participation on a Data Safety Monitoring                                                                    | <input checked="" type="checkbox"/> <b>None</b>                                                     |                                                                                            |
|          |                                                                                                              |                                                                                                     |                                                                                            |

|                                                                                                                                                                                                                                                               |                                                                                                   | <b>Name all entities with whom you have this relationship or indicate none (add rows as needed)</b> | <b>Specifications/Comments (e.g., if payments were made to you or to your institution)</b> |
|---------------------------------------------------------------------------------------------------------------------------------------------------------------------------------------------------------------------------------------------------------------|---------------------------------------------------------------------------------------------------|-----------------------------------------------------------------------------------------------------|--------------------------------------------------------------------------------------------|
|                                                                                                                                                                                                                                                               | Board or Advisory Board                                                                           |                                                                                                     |                                                                                            |
| <b>10</b>                                                                                                                                                                                                                                                     | Leadership or fiduciary role in other board, society, committee or advocacy group, paid or unpaid | <input checked="" type="checkbox"/> <b>None</b>                                                     |                                                                                            |
|                                                                                                                                                                                                                                                               |                                                                                                   |                                                                                                     |                                                                                            |
|                                                                                                                                                                                                                                                               |                                                                                                   |                                                                                                     |                                                                                            |
| <b>11</b>                                                                                                                                                                                                                                                     | Stock or stock options                                                                            | <input type="checkbox"/> <b>None</b>                                                                |                                                                                            |
|                                                                                                                                                                                                                                                               |                                                                                                   | Tegus Medical                                                                                       |                                                                                            |
|                                                                                                                                                                                                                                                               |                                                                                                   |                                                                                                     |                                                                                            |
|                                                                                                                                                                                                                                                               |                                                                                                   |                                                                                                     |                                                                                            |
| <b>12</b>                                                                                                                                                                                                                                                     | Receipt of equipment, materials, drugs, medical writing, gifts or other services                  | <input checked="" type="checkbox"/> <b>None</b>                                                     |                                                                                            |
|                                                                                                                                                                                                                                                               |                                                                                                   |                                                                                                     |                                                                                            |
|                                                                                                                                                                                                                                                               |                                                                                                   |                                                                                                     |                                                                                            |
| <b>13</b>                                                                                                                                                                                                                                                     | Other financial or non-financial interests                                                        | <input type="checkbox"/> <b>None</b>                                                                |                                                                                            |
|                                                                                                                                                                                                                                                               |                                                                                                   | Associate Editor for the Journal of Neurointerventional Surgery                                     |                                                                                            |
|                                                                                                                                                                                                                                                               |                                                                                                   |                                                                                                     |                                                                                            |
|                                                                                                                                                                                                                                                               |                                                                                                   |                                                                                                     |                                                                                            |
| <p><b>Please place an "X" next to the following statement to indicate your agreement:</b></p> <p><input checked="" type="checkbox"/> I certify that I have answered every question and have not altered the wording of any of the questions on this form.</p> |                                                                                                   |                                                                                                     |                                                                                            |

## ICMJE DISCLOSURE FORM

**Date:** 12/21/2021

**Your Name:** Ana Catarina Fonseca

**Manuscript Title:** European Stroke Organisation (ESO) - European Society for Minimally Invasive Neurological Therapy (ESMINT) expedited recommendation on intravenous thrombolysis before mechanical thrombectomy in patients with acute ischemic stroke

**Manuscript Number (if known):** neurintsurg-2021-018589

In the interest of transparency, we ask you to disclose all relationships/activities/interests listed below that are related to the content of your manuscript. "Related" means any relation with for-profit or not-for-profit third parties whose interests may be affected by the content of the manuscript. Disclosure represents a commitment to transparency and does not necessarily indicate a bias. If you are in doubt about whether to list a relationship/activity/interest, it is preferable that you do so.

The author's relationships/activities/interests should be defined broadly. For example, if your manuscript pertains to the epidemiology of hypertension, you should declare all relationships with manufacturers of antihypertensive medication, even if that medication is not mentioned in the manuscript.

In item #1 below, report all support for the work reported in this manuscript without time limit. For all other items, the time frame for disclosure is the past 36 months.

|                                                                                                  |                                                                                                                                                                                | Name all entities with whom you have this relationship or indicate none (add rows as needed)                                                                                                                                                                      | Specifications/Comments (e.g., if payments were made to you or to your institution)              |  |  |  |  |  |                                           |
|--------------------------------------------------------------------------------------------------|--------------------------------------------------------------------------------------------------------------------------------------------------------------------------------|-------------------------------------------------------------------------------------------------------------------------------------------------------------------------------------------------------------------------------------------------------------------|--------------------------------------------------------------------------------------------------|--|--|--|--|--|-------------------------------------------|
| <b>Time frame: Since the initial planning of the work</b>                                        |                                                                                                                                                                                |                                                                                                                                                                                                                                                                   |                                                                                                  |  |  |  |  |  |                                           |
| <b>1</b>                                                                                         | All support for the present manuscript (e.g., funding, provision of study materials, medical writing, article processing charges, etc.)<br><b>No time limit for this item.</b> | <input checked="" type="checkbox"/> <b>None</b><br><table border="1" style="width: 100%; height: 40px;"> <tr><td> </td><td> </td></tr> <tr><td> </td><td> </td></tr> <tr><td> </td><td> </td></tr> </table>                                                       |                                                                                                  |  |  |  |  |  | Click the tab key to add additional rows. |
|                                                                                                  |                                                                                                                                                                                |                                                                                                                                                                                                                                                                   |                                                                                                  |  |  |  |  |  |                                           |
|                                                                                                  |                                                                                                                                                                                |                                                                                                                                                                                                                                                                   |                                                                                                  |  |  |  |  |  |                                           |
|                                                                                                  |                                                                                                                                                                                |                                                                                                                                                                                                                                                                   |                                                                                                  |  |  |  |  |  |                                           |
| <b>Time frame: past 36 months</b>                                                                |                                                                                                                                                                                |                                                                                                                                                                                                                                                                   |                                                                                                  |  |  |  |  |  |                                           |
| <b>2</b>                                                                                         | Grants or contracts from any entity (if not indicated in item #1 above).                                                                                                       | <input type="checkbox"/> <b>None</b><br><table border="1" style="width: 100%; height: 40px;"> <tr><td>Grants from "The foundation for science and technology" and from the "Portuguese Stroke Society"</td><td> </td></tr> <tr><td> </td><td> </td></tr> </table> | Grants from "The foundation for science and technology" and from the "Portuguese Stroke Society" |  |  |  |  |  |                                           |
| Grants from "The foundation for science and technology" and from the "Portuguese Stroke Society" |                                                                                                                                                                                |                                                                                                                                                                                                                                                                   |                                                                                                  |  |  |  |  |  |                                           |
|                                                                                                  |                                                                                                                                                                                |                                                                                                                                                                                                                                                                   |                                                                                                  |  |  |  |  |  |                                           |

|           |                                                                                                              | <b>Name all entities with whom you have this relationship or indicate none (add rows as needed)</b> | <b>Specifications/Comments (e.g., if payments were made to you or to your institution)</b> |
|-----------|--------------------------------------------------------------------------------------------------------------|-----------------------------------------------------------------------------------------------------|--------------------------------------------------------------------------------------------|
| <b>3</b>  | Royalties or licenses                                                                                        | <input checked="" type="checkbox"/> <b>None</b>                                                     |                                                                                            |
|           |                                                                                                              |                                                                                                     |                                                                                            |
|           |                                                                                                              |                                                                                                     |                                                                                            |
| <b>4</b>  | Consulting fees                                                                                              | <input checked="" type="checkbox"/> <b>None</b>                                                     |                                                                                            |
|           |                                                                                                              |                                                                                                     |                                                                                            |
|           |                                                                                                              |                                                                                                     |                                                                                            |
| <b>5</b>  | Payment or honoraria for lectures, presentations, speakers bureaus, manuscript writing or educational events | <input type="checkbox"/> <b>None</b>                                                                |                                                                                            |
|           |                                                                                                              | Speaker fees from Daiichi Sankyo                                                                    |                                                                                            |
|           |                                                                                                              |                                                                                                     |                                                                                            |
| <b>6</b>  | Payment for expert testimony                                                                                 | <input checked="" type="checkbox"/> <b>None</b>                                                     |                                                                                            |
|           |                                                                                                              |                                                                                                     |                                                                                            |
|           |                                                                                                              |                                                                                                     |                                                                                            |
| <b>7</b>  | Support for attending meetings and/or travel                                                                 | <input checked="" type="checkbox"/> <b>None</b>                                                     |                                                                                            |
|           |                                                                                                              |                                                                                                     |                                                                                            |
|           |                                                                                                              |                                                                                                     |                                                                                            |
| <b>8</b>  | Patents planned, issued or pending                                                                           | <input checked="" type="checkbox"/> <b>None</b>                                                     |                                                                                            |
|           |                                                                                                              |                                                                                                     |                                                                                            |
|           |                                                                                                              |                                                                                                     |                                                                                            |
| <b>9</b>  | Participation on a Data Safety Monitoring Board or Advisory Board                                            | <input checked="" type="checkbox"/> <b>None</b>                                                     |                                                                                            |
|           |                                                                                                              |                                                                                                     |                                                                                            |
|           |                                                                                                              |                                                                                                     |                                                                                            |
| <b>10</b> | Leadership or fiduciary role in other board, society,                                                        | <input checked="" type="checkbox"/> <b>None</b>                                                     |                                                                                            |
|           |                                                                                                              |                                                                                                     |                                                                                            |
|           |                                                                                                              |                                                                                                     |                                                                                            |

|                                                                                                                                                                                                                                                               |                                                                                  | <b>Name all entities with whom you have this relationship or indicate none (add rows as needed)</b> | <b>Specifications/Comments (e.g., if payments were made to you or to your institution)</b> |
|---------------------------------------------------------------------------------------------------------------------------------------------------------------------------------------------------------------------------------------------------------------|----------------------------------------------------------------------------------|-----------------------------------------------------------------------------------------------------|--------------------------------------------------------------------------------------------|
|                                                                                                                                                                                                                                                               | committee or advocacy group, paid or unpaid                                      |                                                                                                     |                                                                                            |
| <b>1</b>                                                                                                                                                                                                                                                      | Stock or stock options                                                           | <input checked="" type="checkbox"/> <b>None</b>                                                     |                                                                                            |
| <b>1</b>                                                                                                                                                                                                                                                      |                                                                                  |                                                                                                     |                                                                                            |
| <b>1</b>                                                                                                                                                                                                                                                      | Receipt of equipment, materials, drugs, medical writing, gifts or other services | <input checked="" type="checkbox"/> <b>None</b>                                                     |                                                                                            |
| <b>2</b>                                                                                                                                                                                                                                                      |                                                                                  |                                                                                                     |                                                                                            |
| <b>1</b>                                                                                                                                                                                                                                                      | Other financial or non-financial interests                                       | <input checked="" type="checkbox"/> <b>None</b>                                                     |                                                                                            |
| <b>3</b>                                                                                                                                                                                                                                                      |                                                                                  |                                                                                                     |                                                                                            |
| <p><b>Please place an "X" next to the following statement to indicate your agreement:</b></p> <p><input checked="" type="checkbox"/> I certify that I have answered every question and have not altered the wording of any of the questions on this form.</p> |                                                                                  |                                                                                                     |                                                                                            |



## ICMJE DISCLOSURE FORM

**Date:** 12/21/2021

**Your Name:** Pooja Khatri

**Manuscript Title:** European Stroke Organisation (ESO) - European Society for Minimally Invasive Neurological Therapy (ESMINT) expedited recommendation on intravenous thrombolysis before mechanical thrombectomy in patients with acute ischemic stroke

**Manuscript Number (if known):** neurintsurg-2021-018589

In the interest of transparency, we ask you to disclose all relationships/activities/interests listed below that are related to the content of your manuscript. "Related" means any relation with for-profit or not-for-profit third parties whose interests may be affected by the content of the manuscript. Disclosure represents a commitment to transparency and does not necessarily indicate a bias. If you are in doubt about whether to list a relationship/activity/interest, it is preferable that you do so.

The author's relationships/activities/interests should be defined broadly. For example, if your manuscript pertains to the epidemiology of hypertension, you should declare all relationships with manufacturers of antihypertensive medication, even if that medication is not mentioned in the manuscript.

In item #1 below, report all support for the work reported in this manuscript without time limit. For all other items, the time frame for disclosure is the past 36 months.

|                                                           | Name all entities with whom you have this relationship or indicate none (add rows as needed)                                                                                   | Specifications/Comments (e.g., if payments were made to you or to your institution)                                                                                                                                                                                                                                                                                                                                                |                                               |  |  |  |  |  |
|-----------------------------------------------------------|--------------------------------------------------------------------------------------------------------------------------------------------------------------------------------|------------------------------------------------------------------------------------------------------------------------------------------------------------------------------------------------------------------------------------------------------------------------------------------------------------------------------------------------------------------------------------------------------------------------------------|-----------------------------------------------|--|--|--|--|--|
| <b>Time frame: Since the initial planning of the work</b> |                                                                                                                                                                                |                                                                                                                                                                                                                                                                                                                                                                                                                                    |                                               |  |  |  |  |  |
| <b>1</b>                                                  | All support for the present manuscript (e.g., funding, provision of study materials, medical writing, article processing charges, etc.)<br><b>No time limit for this item.</b> | <input checked="" type="checkbox"/> <b>None</b><br><table border="1" style="width: 100%; border-collapse: collapse; margin-top: 10px;"> <tr><td style="width: 60%; height: 20px;"></td><td style="width: 40%;"></td></tr> <tr><td style="height: 20px;"></td><td></td></tr> <tr><td style="height: 20px;"></td><td></td></tr> </table> <p style="font-size: small; margin-top: 5px;">Click the tab key to add additional rows.</p> |                                               |  |  |  |  |  |
|                                                           |                                                                                                                                                                                |                                                                                                                                                                                                                                                                                                                                                                                                                                    |                                               |  |  |  |  |  |
|                                                           |                                                                                                                                                                                |                                                                                                                                                                                                                                                                                                                                                                                                                                    |                                               |  |  |  |  |  |
|                                                           |                                                                                                                                                                                |                                                                                                                                                                                                                                                                                                                                                                                                                                    |                                               |  |  |  |  |  |
| <b>Time frame: past 36 months</b>                         |                                                                                                                                                                                |                                                                                                                                                                                                                                                                                                                                                                                                                                    |                                               |  |  |  |  |  |
| <b>2</b>                                                  | Grants or contracts from any entity (if not indicated in item #1 above).                                                                                                       | <input type="checkbox"/> <b>None</b><br><table border="1" style="width: 100%; border-collapse: collapse; margin-top: 10px;"> <tr><td style="width: 60%; height: 20px;">Bayer (National Leader, Pacific Stroke trial)</td><td style="width: 40%;"></td></tr> <tr><td style="height: 20px;"></td><td></td></tr> <tr><td style="height: 20px;"></td><td></td></tr> </table>                                                           | Bayer (National Leader, Pacific Stroke trial) |  |  |  |  |  |
| Bayer (National Leader, Pacific Stroke trial)             |                                                                                                                                                                                |                                                                                                                                                                                                                                                                                                                                                                                                                                    |                                               |  |  |  |  |  |
|                                                           |                                                                                                                                                                                |                                                                                                                                                                                                                                                                                                                                                                                                                                    |                                               |  |  |  |  |  |
|                                                           |                                                                                                                                                                                |                                                                                                                                                                                                                                                                                                                                                                                                                                    |                                               |  |  |  |  |  |

|           |                                                                                                              | <b>Name all entities with whom you have this relationship or indicate none (add rows as needed)</b> | <b>Specifications/Comments (e.g., if payments were made to you or to your institution)</b> |
|-----------|--------------------------------------------------------------------------------------------------------------|-----------------------------------------------------------------------------------------------------|--------------------------------------------------------------------------------------------|
| <b>3</b>  | Royalties or licenses                                                                                        | <input checked="" type="checkbox"/> <b>None</b><br><br><br>                                         |                                                                                            |
| <b>4</b>  | Consulting fees                                                                                              | <input checked="" type="checkbox"/> <b>None</b><br><br><br>                                         |                                                                                            |
| <b>5</b>  | Payment or honoraria for lectures, presentations, speakers bureaus, manuscript writing or educational events | <input checked="" type="checkbox"/> <b>None</b><br><br><br>                                         |                                                                                            |
| <b>6</b>  | Payment for expert testimony                                                                                 | <input checked="" type="checkbox"/> <b>None</b><br><br><br>                                         |                                                                                            |
| <b>7</b>  | Support for attending meetings and/or travel                                                                 | <input checked="" type="checkbox"/> <b>None</b><br><br><br>                                         |                                                                                            |
| <b>8</b>  | Patents planned, issued or pending                                                                           | <input checked="" type="checkbox"/> <b>None</b><br><br><br>                                         |                                                                                            |
| <b>9</b>  | Participation on a Data Safety Monitoring Board or Advisory Board                                            | <input type="checkbox"/> <b>None</b><br>Basking Biosciences (Advisor)<br><br>                       |                                                                                            |
| <b>10</b> | Leadership or fiduciary role in other board, society,                                                        | <input checked="" type="checkbox"/> <b>None</b><br><br><br>                                         |                                                                                            |

|                                                                                                                                                                                                                                                               |                                                                                  | <b>Name all entities with whom you have this relationship or indicate none (add rows as needed)</b>                                    | <b>Specifications/Comments (e.g., if payments were made to you or to your institution)</b> |
|---------------------------------------------------------------------------------------------------------------------------------------------------------------------------------------------------------------------------------------------------------------|----------------------------------------------------------------------------------|----------------------------------------------------------------------------------------------------------------------------------------|--------------------------------------------------------------------------------------------|
|                                                                                                                                                                                                                                                               | committee or advocacy group, paid or unpaid                                      |                                                                                                                                        |                                                                                            |
| <b>1</b>                                                                                                                                                                                                                                                      | Stock or stock options                                                           | <input checked="" type="checkbox"/> <b>None</b>                                                                                        |                                                                                            |
| <b>1</b>                                                                                                                                                                                                                                                      |                                                                                  |                                                                                                                                        |                                                                                            |
| <b>1</b>                                                                                                                                                                                                                                                      | Receipt of equipment, materials, drugs, medical writing, gifts or other services | <input checked="" type="checkbox"/> <b>None</b>                                                                                        |                                                                                            |
| <b>2</b>                                                                                                                                                                                                                                                      |                                                                                  |                                                                                                                                        |                                                                                            |
| <b>1</b>                                                                                                                                                                                                                                                      | Other financial or non-financial interests                                       | <input type="checkbox"/> <b>None</b>                                                                                                   |                                                                                            |
| <b>3</b>                                                                                                                                                                                                                                                      |                                                                                  | My department receives funding from Cerenovus (investigator-initiated grant, ENDOLOW trial), Lumosa (advisor), and Diamedica (advisor) |                                                                                            |
|                                                                                                                                                                                                                                                               |                                                                                  |                                                                                                                                        |                                                                                            |
| <p><b>Please place an "X" next to the following statement to indicate your agreement:</b></p> <p><input checked="" type="checkbox"/> I certify that I have answered every question and have not altered the wording of any of the questions on this form.</p> |                                                                                  |                                                                                                                                        |                                                                                            |

## ICMJE DISCLOSURE FORM

**Date:** 12/21/2021

**Your Name:** Mikael Mazighi

**Manuscript Title:** European Stroke Organisation (ESO) - European Society for Minimally Invasive Neurological Therapy (ESMINT) expedited recommendation on intravenous thrombolysis before mechanical thrombectomy in patients with acute ischemic stroke

**Manuscript Number (if known):** neurintsurg-2021-018589

In the interest of transparency, we ask you to disclose all relationships/activities/interests listed below that are related to the content of your manuscript. "Related" means any relation with for-profit or not-for-profit third parties whose interests may be affected by the content of the manuscript. Disclosure represents a commitment to transparency and does not necessarily indicate a bias. If you are in doubt about whether to list a relationship/activity/interest, it is preferable that you do so.

The author's relationships/activities/interests should be defined broadly. For example, if your manuscript pertains to the epidemiology of hypertension, you should declare all relationships with manufacturers of antihypertensive medication, even if that medication is not mentioned in the manuscript.

In item #1 below, report all support for the work reported in this manuscript without time limit. For all other items, the time frame for disclosure is the past 36 months.

|                                                           | Name all entities with whom you have this relationship or indicate none (add rows as needed)                                                                                   | Specifications/Comments (e.g., if payments were made to you or to your institution)                                                                                                                                                                                                                                                                                                                                                |                               |  |  |  |  |  |
|-----------------------------------------------------------|--------------------------------------------------------------------------------------------------------------------------------------------------------------------------------|------------------------------------------------------------------------------------------------------------------------------------------------------------------------------------------------------------------------------------------------------------------------------------------------------------------------------------------------------------------------------------------------------------------------------------|-------------------------------|--|--|--|--|--|
| <b>Time frame: Since the initial planning of the work</b> |                                                                                                                                                                                |                                                                                                                                                                                                                                                                                                                                                                                                                                    |                               |  |  |  |  |  |
| <b>1</b>                                                  | All support for the present manuscript (e.g., funding, provision of study materials, medical writing, article processing charges, etc.)<br><b>No time limit for this item.</b> | <input checked="" type="checkbox"/> <b>None</b><br><table border="1" style="width: 100%; border-collapse: collapse; margin-top: 10px;"> <tr><td style="width: 60%; height: 20px;"></td><td style="width: 40%;"></td></tr> <tr><td style="height: 20px;"></td><td></td></tr> <tr><td style="height: 20px;"></td><td></td></tr> </table> <p style="font-size: small; margin-top: 5px;">Click the tab key to add additional rows.</p> |                               |  |  |  |  |  |
|                                                           |                                                                                                                                                                                |                                                                                                                                                                                                                                                                                                                                                                                                                                    |                               |  |  |  |  |  |
|                                                           |                                                                                                                                                                                |                                                                                                                                                                                                                                                                                                                                                                                                                                    |                               |  |  |  |  |  |
|                                                           |                                                                                                                                                                                |                                                                                                                                                                                                                                                                                                                                                                                                                                    |                               |  |  |  |  |  |
| <b>Time frame: past 36 months</b>                         |                                                                                                                                                                                |                                                                                                                                                                                                                                                                                                                                                                                                                                    |                               |  |  |  |  |  |
| <b>2</b>                                                  | Grants or contracts from any entity (if not indicated in item #1 above).                                                                                                       | <input type="checkbox"/> <b>None</b><br><table border="1" style="width: 100%; border-collapse: collapse; margin-top: 10px;"> <tr><td style="width: 60%; height: 20px;">RHU BOOSTER- ANR-18-RHUS-0001</td><td style="width: 40%;"></td></tr> <tr><td style="height: 20px;"></td><td></td></tr> <tr><td style="height: 20px;"></td><td></td></tr> </table>                                                                           | RHU BOOSTER- ANR-18-RHUS-0001 |  |  |  |  |  |
| RHU BOOSTER- ANR-18-RHUS-0001                             |                                                                                                                                                                                |                                                                                                                                                                                                                                                                                                                                                                                                                                    |                               |  |  |  |  |  |
|                                                           |                                                                                                                                                                                |                                                                                                                                                                                                                                                                                                                                                                                                                                    |                               |  |  |  |  |  |
|                                                           |                                                                                                                                                                                |                                                                                                                                                                                                                                                                                                                                                                                                                                    |                               |  |  |  |  |  |

|                      |                                                                                                              | <b>Name all entities with whom you have this relationship or indicate none (add rows as needed)</b>                                                                                                                                                                                                                                 | <b>Specifications/Comments (e.g., if payments were made to you or to your institution)</b> |            |             |            |                 |            |             |            |  |
|----------------------|--------------------------------------------------------------------------------------------------------------|-------------------------------------------------------------------------------------------------------------------------------------------------------------------------------------------------------------------------------------------------------------------------------------------------------------------------------------|--------------------------------------------------------------------------------------------|------------|-------------|------------|-----------------|------------|-------------|------------|--|
| <b>3</b>             | Royalties or licenses                                                                                        | <input checked="" type="checkbox"/> <b>None</b><br><table border="1" style="width:100%; border-collapse: collapse;"> <tr><td> </td><td> </td></tr> <tr><td> </td><td> </td></tr> <tr><td> </td><td> </td></tr> </table>                                                                                                             |                                                                                            |            |             |            |                 |            |             |            |  |
|                      |                                                                                                              |                                                                                                                                                                                                                                                                                                                                     |                                                                                            |            |             |            |                 |            |             |            |  |
|                      |                                                                                                              |                                                                                                                                                                                                                                                                                                                                     |                                                                                            |            |             |            |                 |            |             |            |  |
|                      |                                                                                                              |                                                                                                                                                                                                                                                                                                                                     |                                                                                            |            |             |            |                 |            |             |            |  |
| <b>4</b>             | Consulting fees                                                                                              | <input type="checkbox"/> <b>None</b><br><table border="1" style="width:100%; border-collapse: collapse;"> <tr><td>Boehringer Ingelheim</td><td>consulting</td></tr> <tr><td>Air liquide</td><td>consulting</td></tr> <tr><td>Acticor Biotech</td><td>consulting</td></tr> <tr><td>Novonordisk</td><td>consulting</td></tr> </table> | Boehringer Ingelheim                                                                       | consulting | Air liquide | consulting | Acticor Biotech | consulting | Novonordisk | consulting |  |
| Boehringer Ingelheim | consulting                                                                                                   |                                                                                                                                                                                                                                                                                                                                     |                                                                                            |            |             |            |                 |            |             |            |  |
| Air liquide          | consulting                                                                                                   |                                                                                                                                                                                                                                                                                                                                     |                                                                                            |            |             |            |                 |            |             |            |  |
| Acticor Biotech      | consulting                                                                                                   |                                                                                                                                                                                                                                                                                                                                     |                                                                                            |            |             |            |                 |            |             |            |  |
| Novonordisk          | consulting                                                                                                   |                                                                                                                                                                                                                                                                                                                                     |                                                                                            |            |             |            |                 |            |             |            |  |
| <b>5</b>             | Payment or honoraria for lectures, presentations, speakers bureaus, manuscript writing or educational events | <input type="checkbox"/> <b>None</b><br><table border="1" style="width:100%; border-collapse: collapse;"> <tr><td>Boehringer Ingelheim</td><td> </td></tr> <tr><td> </td><td> </td></tr> <tr><td> </td><td> </td></tr> </table>                                                                                                     | Boehringer Ingelheim                                                                       |            |             |            |                 |            |             |            |  |
| Boehringer Ingelheim |                                                                                                              |                                                                                                                                                                                                                                                                                                                                     |                                                                                            |            |             |            |                 |            |             |            |  |
|                      |                                                                                                              |                                                                                                                                                                                                                                                                                                                                     |                                                                                            |            |             |            |                 |            |             |            |  |
|                      |                                                                                                              |                                                                                                                                                                                                                                                                                                                                     |                                                                                            |            |             |            |                 |            |             |            |  |
| <b>6</b>             | Payment for expert testimony                                                                                 | <input checked="" type="checkbox"/> <b>None</b><br><table border="1" style="width:100%; border-collapse: collapse;"> <tr><td> </td><td> </td></tr> <tr><td> </td><td> </td></tr> <tr><td> </td><td> </td></tr> </table>                                                                                                             |                                                                                            |            |             |            |                 |            |             |            |  |
|                      |                                                                                                              |                                                                                                                                                                                                                                                                                                                                     |                                                                                            |            |             |            |                 |            |             |            |  |
|                      |                                                                                                              |                                                                                                                                                                                                                                                                                                                                     |                                                                                            |            |             |            |                 |            |             |            |  |
|                      |                                                                                                              |                                                                                                                                                                                                                                                                                                                                     |                                                                                            |            |             |            |                 |            |             |            |  |
| <b>7</b>             | Support for attending meetings and/or travel                                                                 | <input checked="" type="checkbox"/> <b>None</b><br><table border="1" style="width:100%; border-collapse: collapse;"> <tr><td> </td><td> </td></tr> <tr><td> </td><td> </td></tr> <tr><td> </td><td> </td></tr> </table>                                                                                                             |                                                                                            |            |             |            |                 |            |             |            |  |
|                      |                                                                                                              |                                                                                                                                                                                                                                                                                                                                     |                                                                                            |            |             |            |                 |            |             |            |  |
|                      |                                                                                                              |                                                                                                                                                                                                                                                                                                                                     |                                                                                            |            |             |            |                 |            |             |            |  |
|                      |                                                                                                              |                                                                                                                                                                                                                                                                                                                                     |                                                                                            |            |             |            |                 |            |             |            |  |
| <b>8</b>             | Patents planned, issued or pending                                                                           | <input checked="" type="checkbox"/> <b>None</b><br><table border="1" style="width:100%; border-collapse: collapse;"> <tr><td> </td><td> </td></tr> <tr><td> </td><td> </td></tr> <tr><td> </td><td> </td></tr> </table>                                                                                                             |                                                                                            |            |             |            |                 |            |             |            |  |
|                      |                                                                                                              |                                                                                                                                                                                                                                                                                                                                     |                                                                                            |            |             |            |                 |            |             |            |  |
|                      |                                                                                                              |                                                                                                                                                                                                                                                                                                                                     |                                                                                            |            |             |            |                 |            |             |            |  |
|                      |                                                                                                              |                                                                                                                                                                                                                                                                                                                                     |                                                                                            |            |             |            |                 |            |             |            |  |
| <b>9</b>             | Participation on a Data Safety Monitoring Board or Advisory Board                                            | <input checked="" type="checkbox"/> <b>None</b><br><table border="1" style="width:100%; border-collapse: collapse;"> <tr><td> </td><td> </td></tr> <tr><td> </td><td> </td></tr> <tr><td> </td><td> </td></tr> </table>                                                                                                             |                                                                                            |            |             |            |                 |            |             |            |  |
|                      |                                                                                                              |                                                                                                                                                                                                                                                                                                                                     |                                                                                            |            |             |            |                 |            |             |            |  |
|                      |                                                                                                              |                                                                                                                                                                                                                                                                                                                                     |                                                                                            |            |             |            |                 |            |             |            |  |
|                      |                                                                                                              |                                                                                                                                                                                                                                                                                                                                     |                                                                                            |            |             |            |                 |            |             |            |  |
| <b>10</b>            | Leadership or fiduciary role in other board, society,                                                        | <input checked="" type="checkbox"/> <b>None</b><br><table border="1" style="width:100%; border-collapse: collapse;"> <tr><td> </td><td> </td></tr> <tr><td> </td><td> </td></tr> <tr><td> </td><td> </td></tr> </table>                                                                                                             |                                                                                            |            |             |            |                 |            |             |            |  |
|                      |                                                                                                              |                                                                                                                                                                                                                                                                                                                                     |                                                                                            |            |             |            |                 |            |             |            |  |
|                      |                                                                                                              |                                                                                                                                                                                                                                                                                                                                     |                                                                                            |            |             |            |                 |            |             |            |  |
|                      |                                                                                                              |                                                                                                                                                                                                                                                                                                                                     |                                                                                            |            |             |            |                 |            |             |            |  |

|                                                                                                                                                                                                                                                               |                                                                                  | <b>Name all entities with whom you have this relationship or indicate none (add rows as needed)</b> | <b>Specifications/Comments (e.g., if payments were made to you or to your institution)</b> |
|---------------------------------------------------------------------------------------------------------------------------------------------------------------------------------------------------------------------------------------------------------------|----------------------------------------------------------------------------------|-----------------------------------------------------------------------------------------------------|--------------------------------------------------------------------------------------------|
|                                                                                                                                                                                                                                                               | committee or advocacy group, paid or unpaid                                      |                                                                                                     |                                                                                            |
| <b>1</b>                                                                                                                                                                                                                                                      | Stock or stock options                                                           | <input checked="" type="checkbox"/> <b>None</b>                                                     |                                                                                            |
| <b>1</b>                                                                                                                                                                                                                                                      |                                                                                  |                                                                                                     |                                                                                            |
| <b>1</b>                                                                                                                                                                                                                                                      | Receipt of equipment, materials, drugs, medical writing, gifts or other services | <input checked="" type="checkbox"/> <b>None</b>                                                     |                                                                                            |
| <b>2</b>                                                                                                                                                                                                                                                      |                                                                                  |                                                                                                     |                                                                                            |
| <b>1</b>                                                                                                                                                                                                                                                      | Other financial or non-financial interests                                       | <input checked="" type="checkbox"/> <b>None</b>                                                     |                                                                                            |
| <b>3</b>                                                                                                                                                                                                                                                      |                                                                                  |                                                                                                     |                                                                                            |
| <p><b>Please place an "X" next to the following statement to indicate your agreement:</b></p> <p><input checked="" type="checkbox"/> I certify that I have answered every question and have not altered the wording of any of the questions on this form.</p> |                                                                                  |                                                                                                     |                                                                                            |

## ICMJE DISCLOSURE FORM

**Date:** 12/26/2021

**Your Name:** Natalia Pérez de la Ossa

**Manuscript Title:** European Stroke Organisation (ESO) - European Society for Minimally Invasive Neurological Therapy (ESMINT) expedited recommendation on intravenous thrombolysis before mechanical thrombectomy in patients with acute ischemic stroke

**Manuscript Number (if known):** neurintsurg-2021-018589

In the interest of transparency, we ask you to disclose all relationships/activities/interests listed below that are related to the content of your manuscript. "Related" means any relation with for-profit or not-for-profit third parties whose interests may be affected by the content of the manuscript. Disclosure represents a commitment to transparency and does not necessarily indicate a bias. If you are in doubt about whether to list a relationship/activity/interest, it is preferable that you do so.

The author's relationships/activities/interests should be defined broadly. For example, if your manuscript pertains to the epidemiology of hypertension, you should declare all relationships with manufacturers of antihypertensive medication, even if that medication is not mentioned in the manuscript.

In item #1 below, report all support for the work reported in this manuscript without time limit. For all other items, the time frame for disclosure is the past 36 months.

|                                                                                                                                                                                                 |                                                                                                                                                                                | Name all entities with whom you have this relationship or indicate none (add rows as needed)                                                                                                                                                                                                                                                                                                                                                                                              | Specifications/Comments (e.g., if payments were made to you or to your institution)                                                                                                             |  |                                                                             |  |  |  |                                           |
|-------------------------------------------------------------------------------------------------------------------------------------------------------------------------------------------------|--------------------------------------------------------------------------------------------------------------------------------------------------------------------------------|-------------------------------------------------------------------------------------------------------------------------------------------------------------------------------------------------------------------------------------------------------------------------------------------------------------------------------------------------------------------------------------------------------------------------------------------------------------------------------------------|-------------------------------------------------------------------------------------------------------------------------------------------------------------------------------------------------|--|-----------------------------------------------------------------------------|--|--|--|-------------------------------------------|
| <b>Time frame: Since the initial planning of the work</b>                                                                                                                                       |                                                                                                                                                                                |                                                                                                                                                                                                                                                                                                                                                                                                                                                                                           |                                                                                                                                                                                                 |  |                                                                             |  |  |  |                                           |
| <b>1</b>                                                                                                                                                                                        | All support for the present manuscript (e.g., funding, provision of study materials, medical writing, article processing charges, etc.)<br><b>No time limit for this item.</b> | <input checked="" type="checkbox"/> <b>None</b><br><table border="1" style="width: 100%; height: 40px; margin-top: 5px;"> <tr><td> </td><td> </td></tr> <tr><td> </td><td> </td></tr> <tr><td> </td><td> </td></tr> </table>                                                                                                                                                                                                                                                              |                                                                                                                                                                                                 |  |                                                                             |  |  |  | Click the tab key to add additional rows. |
|                                                                                                                                                                                                 |                                                                                                                                                                                |                                                                                                                                                                                                                                                                                                                                                                                                                                                                                           |                                                                                                                                                                                                 |  |                                                                             |  |  |  |                                           |
|                                                                                                                                                                                                 |                                                                                                                                                                                |                                                                                                                                                                                                                                                                                                                                                                                                                                                                                           |                                                                                                                                                                                                 |  |                                                                             |  |  |  |                                           |
|                                                                                                                                                                                                 |                                                                                                                                                                                |                                                                                                                                                                                                                                                                                                                                                                                                                                                                                           |                                                                                                                                                                                                 |  |                                                                             |  |  |  |                                           |
| <b>Time frame: past 36 months</b>                                                                                                                                                               |                                                                                                                                                                                |                                                                                                                                                                                                                                                                                                                                                                                                                                                                                           |                                                                                                                                                                                                 |  |                                                                             |  |  |  |                                           |
| <b>2</b>                                                                                                                                                                                        | Grants or contracts from any entity (if not indicated in item #1 above).                                                                                                       | <input type="checkbox"/> <b>None</b><br><table border="1" style="width: 100%; height: 80px; margin-top: 5px;"> <tr><td>Spanish Ministry of Health co financed by Fondo Europeo de Desarrollo Regional (Instituto de Salud Carlos III, Red Temática de Investigación Cooperativa RETICS-INVICTUS-PLUS RD0016/0019/0020)</td><td> </td></tr> <tr><td>PERIS programme from the Catalan Health Government (project SLT008/18/0007)</td><td> </td></tr> <tr><td> </td><td> </td></tr> </table> | Spanish Ministry of Health co financed by Fondo Europeo de Desarrollo Regional (Instituto de Salud Carlos III, Red Temática de Investigación Cooperativa RETICS-INVICTUS-PLUS RD0016/0019/0020) |  | PERIS programme from the Catalan Health Government (project SLT008/18/0007) |  |  |  |                                           |
| Spanish Ministry of Health co financed by Fondo Europeo de Desarrollo Regional (Instituto de Salud Carlos III, Red Temática de Investigación Cooperativa RETICS-INVICTUS-PLUS RD0016/0019/0020) |                                                                                                                                                                                |                                                                                                                                                                                                                                                                                                                                                                                                                                                                                           |                                                                                                                                                                                                 |  |                                                                             |  |  |  |                                           |
| PERIS programme from the Catalan Health Government (project SLT008/18/0007)                                                                                                                     |                                                                                                                                                                                |                                                                                                                                                                                                                                                                                                                                                                                                                                                                                           |                                                                                                                                                                                                 |  |                                                                             |  |  |  |                                           |
|                                                                                                                                                                                                 |                                                                                                                                                                                |                                                                                                                                                                                                                                                                                                                                                                                                                                                                                           |                                                                                                                                                                                                 |  |                                                                             |  |  |  |                                           |

|           |                                                                                                              | <b>Name all entities with whom you have this relationship or indicate none (add rows as needed)</b> | <b>Specifications/Comments (e.g., if payments were made to you or to your institution)</b> |
|-----------|--------------------------------------------------------------------------------------------------------------|-----------------------------------------------------------------------------------------------------|--------------------------------------------------------------------------------------------|
| <b>3</b>  | Royalties or licenses                                                                                        | <input checked="" type="checkbox"/> <b>None</b>                                                     |                                                                                            |
|           |                                                                                                              |                                                                                                     |                                                                                            |
|           |                                                                                                              |                                                                                                     |                                                                                            |
| <b>4</b>  | Consulting fees                                                                                              | <input checked="" type="checkbox"/> <b>None</b>                                                     |                                                                                            |
|           |                                                                                                              |                                                                                                     |                                                                                            |
|           |                                                                                                              |                                                                                                     |                                                                                            |
| <b>5</b>  | Payment or honoraria for lectures, presentations, speakers bureaus, manuscript writing or educational events | <input type="checkbox"/> <b>None</b>                                                                |                                                                                            |
|           |                                                                                                              | Medtronic                                                                                           | Lectures                                                                                   |
|           |                                                                                                              | Angels Initiative Boehringer Ingelheim                                                              | Lectures                                                                                   |
|           |                                                                                                              |                                                                                                     |                                                                                            |
| <b>6</b>  | Payment for expert testimony                                                                                 | <input checked="" type="checkbox"/> <b>None</b>                                                     |                                                                                            |
|           |                                                                                                              |                                                                                                     |                                                                                            |
|           |                                                                                                              |                                                                                                     |                                                                                            |
| <b>7</b>  | Support for attending meetings and/or travel                                                                 | <input checked="" type="checkbox"/> <b>None</b>                                                     |                                                                                            |
|           |                                                                                                              |                                                                                                     |                                                                                            |
|           |                                                                                                              |                                                                                                     |                                                                                            |
| <b>8</b>  | Patents planned, issued or pending                                                                           | <input checked="" type="checkbox"/> <b>None</b>                                                     |                                                                                            |
|           |                                                                                                              |                                                                                                     |                                                                                            |
|           |                                                                                                              |                                                                                                     |                                                                                            |
| <b>9</b>  | Participation on a Data Safety Monitoring Board or Advisory Board                                            | <input checked="" type="checkbox"/> <b>None</b>                                                     |                                                                                            |
|           |                                                                                                              |                                                                                                     |                                                                                            |
|           |                                                                                                              |                                                                                                     |                                                                                            |
| <b>10</b> | Leadership or fiduciary role in other board, society,                                                        | <input checked="" type="checkbox"/> <b>None</b>                                                     |                                                                                            |
|           |                                                                                                              |                                                                                                     |                                                                                            |
|           |                                                                                                              |                                                                                                     |                                                                                            |



|                                                                                                                                                                                                                                                               |                                                                                  | <b>Name all entities with whom you have this relationship or indicate none (add rows as needed)</b> | <b>Specifications/Comments (e.g., if payments were made to you or to your institution)</b> |
|---------------------------------------------------------------------------------------------------------------------------------------------------------------------------------------------------------------------------------------------------------------|----------------------------------------------------------------------------------|-----------------------------------------------------------------------------------------------------|--------------------------------------------------------------------------------------------|
|                                                                                                                                                                                                                                                               | committee or advocacy group, paid or unpaid                                      |                                                                                                     |                                                                                            |
| <b>1</b>                                                                                                                                                                                                                                                      | Stock or stock options                                                           | <input checked="" type="checkbox"/> <b>None</b>                                                     |                                                                                            |
| <b>1</b>                                                                                                                                                                                                                                                      |                                                                                  |                                                                                                     |                                                                                            |
| <b>1</b>                                                                                                                                                                                                                                                      | Receipt of equipment, materials, drugs, medical writing, gifts or other services | <input checked="" type="checkbox"/> <b>None</b>                                                     |                                                                                            |
| <b>2</b>                                                                                                                                                                                                                                                      |                                                                                  |                                                                                                     |                                                                                            |
| <b>1</b>                                                                                                                                                                                                                                                      | Other financial or non-financial interests                                       | <input checked="" type="checkbox"/> <b>None</b>                                                     |                                                                                            |
| <b>3</b>                                                                                                                                                                                                                                                      |                                                                                  |                                                                                                     |                                                                                            |
| <p><b>Please place an "X" next to the following statement to indicate your agreement:</b></p> <p><input checked="" type="checkbox"/> I certify that I have answered every question and have not altered the wording of any of the questions on this form.</p> |                                                                                  |                                                                                                     |                                                                                            |

## ICMJE DISCLOSURE FORM

**Date:** 12/21/2021

**Your Name:** Peter D Schellinger

**Manuscript Title:** European Stroke Organisation (ESO) - European Society for Minimally Invasive Neurological Therapy (ESMINT) expedited recommendation on intravenous thrombolysis before mechanical thrombectomy in patients with acute ischemic stroke

**Manuscript Number (if known):** neurintsurg-2021-018589

In the interest of transparency, we ask you to disclose all relationships/activities/interests listed below that are related to the content of your manuscript. "Related" means any relation with for-profit or not-for-profit third parties whose interests may be affected by the content of the manuscript. Disclosure represents a commitment to transparency and does not necessarily indicate a bias. If you are in doubt about whether to list a relationship/activity/interest, it is preferable that you do so.

The author's relationships/activities/interests should be defined broadly. For example, if your manuscript pertains to the epidemiology of hypertension, you should declare all relationships with manufacturers of antihypertensive medication, even if that medication is not mentioned in the manuscript.

In item #1 below, report all support for the work reported in this manuscript without time limit. For all other items, the time frame for disclosure is the past 36 months.

|                                                           | Name all entities with whom you have this relationship or indicate none (add rows as needed)                                                                                   | Specifications/Comments (e.g., if payments were made to you or to your institution)                                                                                                                                                                                                  |  |  |  |  |  |  |
|-----------------------------------------------------------|--------------------------------------------------------------------------------------------------------------------------------------------------------------------------------|--------------------------------------------------------------------------------------------------------------------------------------------------------------------------------------------------------------------------------------------------------------------------------------|--|--|--|--|--|--|
| <b>Time frame: Since the initial planning of the work</b> |                                                                                                                                                                                |                                                                                                                                                                                                                                                                                      |  |  |  |  |  |  |
| <b>1</b>                                                  | All support for the present manuscript (e.g., funding, provision of study materials, medical writing, article processing charges, etc.)<br><b>No time limit for this item.</b> | <input checked="" type="checkbox"/> <b>None</b><br><table border="1" style="width: 100%; height: 40px; margin-top: 5px;"> <tr><td style="width: 60%;"></td><td></td></tr> <tr><td></td><td></td></tr> <tr><td></td><td></td></tr> </table> Click the tab key to add additional rows. |  |  |  |  |  |  |
|                                                           |                                                                                                                                                                                |                                                                                                                                                                                                                                                                                      |  |  |  |  |  |  |
|                                                           |                                                                                                                                                                                |                                                                                                                                                                                                                                                                                      |  |  |  |  |  |  |
|                                                           |                                                                                                                                                                                |                                                                                                                                                                                                                                                                                      |  |  |  |  |  |  |
| <b>Time frame: past 36 months</b>                         |                                                                                                                                                                                |                                                                                                                                                                                                                                                                                      |  |  |  |  |  |  |
| <b>2</b>                                                  | Grants or contracts from any entity (if not indicated in item #1 above).                                                                                                       | <input checked="" type="checkbox"/> <b>None</b><br><table border="1" style="width: 100%; height: 40px; margin-top: 5px;"> <tr><td style="width: 60%;"></td><td></td></tr> <tr><td></td><td></td></tr> <tr><td></td><td></td></tr> </table>                                           |  |  |  |  |  |  |
|                                                           |                                                                                                                                                                                |                                                                                                                                                                                                                                                                                      |  |  |  |  |  |  |
|                                                           |                                                                                                                                                                                |                                                                                                                                                                                                                                                                                      |  |  |  |  |  |  |
|                                                           |                                                                                                                                                                                |                                                                                                                                                                                                                                                                                      |  |  |  |  |  |  |

|                             |                                                                                                              | <b>Name all entities with whom you have this relationship or indicate none (add rows as needed)</b>                                                                                                                                        | <b>Specifications/Comments (e.g., if payments were made to you or to your institution)</b> |       |  |  |  |  |  |
|-----------------------------|--------------------------------------------------------------------------------------------------------------|--------------------------------------------------------------------------------------------------------------------------------------------------------------------------------------------------------------------------------------------|--------------------------------------------------------------------------------------------|-------|--|--|--|--|--|
| <b>3</b>                    | Royalties or licenses                                                                                        | <input checked="" type="checkbox"/> <b>None</b><br><table border="1" style="width:100%; border-collapse: collapse;"> <tr><td> </td><td> </td></tr> <tr><td> </td><td> </td></tr> <tr><td> </td><td> </td></tr> </table>                    |                                                                                            |       |  |  |  |  |  |
|                             |                                                                                                              |                                                                                                                                                                                                                                            |                                                                                            |       |  |  |  |  |  |
|                             |                                                                                                              |                                                                                                                                                                                                                                            |                                                                                            |       |  |  |  |  |  |
|                             |                                                                                                              |                                                                                                                                                                                                                                            |                                                                                            |       |  |  |  |  |  |
| <b>4</b>                    | Consulting fees                                                                                              | <input type="checkbox"/> <b>None</b><br><table border="1" style="width:100%; border-collapse: collapse;"> <tr><td>Boehringer Ingelheim</td><td>To me</td></tr> <tr><td> </td><td> </td></tr> <tr><td> </td><td> </td></tr> </table>        | Boehringer Ingelheim                                                                       | To me |  |  |  |  |  |
| Boehringer Ingelheim        | To me                                                                                                        |                                                                                                                                                                                                                                            |                                                                                            |       |  |  |  |  |  |
|                             |                                                                                                              |                                                                                                                                                                                                                                            |                                                                                            |       |  |  |  |  |  |
|                             |                                                                                                              |                                                                                                                                                                                                                                            |                                                                                            |       |  |  |  |  |  |
| <b>5</b>                    | Payment or honoraria for lectures, presentations, speakers bureaus, manuscript writing or educational events | <input type="checkbox"/> <b>None</b><br><table border="1" style="width:100%; border-collapse: collapse;"> <tr><td>Boehringer Ingelheim</td><td>To me</td></tr> <tr><td> </td><td> </td></tr> <tr><td> </td><td> </td></tr> </table>        | Boehringer Ingelheim                                                                       | To me |  |  |  |  |  |
| Boehringer Ingelheim        | To me                                                                                                        |                                                                                                                                                                                                                                            |                                                                                            |       |  |  |  |  |  |
|                             |                                                                                                              |                                                                                                                                                                                                                                            |                                                                                            |       |  |  |  |  |  |
|                             |                                                                                                              |                                                                                                                                                                                                                                            |                                                                                            |       |  |  |  |  |  |
| <b>6</b>                    | Payment for expert testimony                                                                                 | <input type="checkbox"/> <b>None</b><br><table border="1" style="width:100%; border-collapse: collapse;"> <tr><td>German Court Expert Witness</td><td>To me</td></tr> <tr><td> </td><td> </td></tr> <tr><td> </td><td> </td></tr> </table> | German Court Expert Witness                                                                | To me |  |  |  |  |  |
| German Court Expert Witness | To me                                                                                                        |                                                                                                                                                                                                                                            |                                                                                            |       |  |  |  |  |  |
|                             |                                                                                                              |                                                                                                                                                                                                                                            |                                                                                            |       |  |  |  |  |  |
|                             |                                                                                                              |                                                                                                                                                                                                                                            |                                                                                            |       |  |  |  |  |  |
| <b>7</b>                    | Support for attending meetings and/or travel                                                                 | <input type="checkbox"/> <b>None</b><br><table border="1" style="width:100%; border-collapse: collapse;"> <tr><td>Boehringer Ingelheim</td><td>To me</td></tr> <tr><td> </td><td> </td></tr> <tr><td> </td><td> </td></tr> </table>        | Boehringer Ingelheim                                                                       | To me |  |  |  |  |  |
| Boehringer Ingelheim        | To me                                                                                                        |                                                                                                                                                                                                                                            |                                                                                            |       |  |  |  |  |  |
|                             |                                                                                                              |                                                                                                                                                                                                                                            |                                                                                            |       |  |  |  |  |  |
|                             |                                                                                                              |                                                                                                                                                                                                                                            |                                                                                            |       |  |  |  |  |  |
| <b>8</b>                    | Patents planned, issued or pending                                                                           | <input checked="" type="checkbox"/> <b>None</b><br><table border="1" style="width:100%; border-collapse: collapse;"> <tr><td> </td><td> </td></tr> <tr><td> </td><td> </td></tr> <tr><td> </td><td> </td></tr> </table>                    |                                                                                            |       |  |  |  |  |  |
|                             |                                                                                                              |                                                                                                                                                                                                                                            |                                                                                            |       |  |  |  |  |  |
|                             |                                                                                                              |                                                                                                                                                                                                                                            |                                                                                            |       |  |  |  |  |  |
|                             |                                                                                                              |                                                                                                                                                                                                                                            |                                                                                            |       |  |  |  |  |  |
| <b>9</b>                    | Participation on a Data Safety Monitoring Board or Advisory Board                                            | <input type="checkbox"/> <b>None</b><br><table border="1" style="width:100%; border-collapse: collapse;"> <tr><td>Boehringer Ingelheim</td><td>To me</td></tr> <tr><td> </td><td> </td></tr> <tr><td> </td><td> </td></tr> </table>        | Boehringer Ingelheim                                                                       | To me |  |  |  |  |  |
| Boehringer Ingelheim        | To me                                                                                                        |                                                                                                                                                                                                                                            |                                                                                            |       |  |  |  |  |  |
|                             |                                                                                                              |                                                                                                                                                                                                                                            |                                                                                            |       |  |  |  |  |  |
|                             |                                                                                                              |                                                                                                                                                                                                                                            |                                                                                            |       |  |  |  |  |  |
| <b>10</b>                   | Leadership or fiduciary role in other board, society,                                                        | <input type="checkbox"/> <b>None</b><br><table border="1" style="width:100%; border-collapse: collapse;"> <tr><td>ESO Executive Committee</td><td> </td></tr> <tr><td> </td><td> </td></tr> <tr><td> </td><td> </td></tr> </table>         | ESO Executive Committee                                                                    |       |  |  |  |  |  |
| ESO Executive Committee     |                                                                                                              |                                                                                                                                                                                                                                            |                                                                                            |       |  |  |  |  |  |
|                             |                                                                                                              |                                                                                                                                                                                                                                            |                                                                                            |       |  |  |  |  |  |
|                             |                                                                                                              |                                                                                                                                                                                                                                            |                                                                                            |       |  |  |  |  |  |

|                                                                                                                                                                                                                                                               |                                                                                  | <b>Name all entities with whom you have this relationship or indicate none (add rows as needed)</b> | <b>Specifications/Comments (e.g., if payments were made to you or to your institution)</b> |
|---------------------------------------------------------------------------------------------------------------------------------------------------------------------------------------------------------------------------------------------------------------|----------------------------------------------------------------------------------|-----------------------------------------------------------------------------------------------------|--------------------------------------------------------------------------------------------|
|                                                                                                                                                                                                                                                               | committee or advocacy group, paid or unpaid                                      |                                                                                                     |                                                                                            |
| <b>1</b>                                                                                                                                                                                                                                                      | Stock or stock options                                                           | <input checked="" type="checkbox"/> <b>None</b>                                                     |                                                                                            |
| <b>1</b>                                                                                                                                                                                                                                                      |                                                                                  |                                                                                                     |                                                                                            |
| <b>1</b>                                                                                                                                                                                                                                                      | Receipt of equipment, materials, drugs, medical writing, gifts or other services | <input type="checkbox"/> <b>None</b>                                                                |                                                                                            |
| <b>2</b>                                                                                                                                                                                                                                                      |                                                                                  |                                                                                                     |                                                                                            |
| <b>1</b>                                                                                                                                                                                                                                                      | Other financial or non-financial interests                                       | <input type="checkbox"/> <b>None</b>                                                                |                                                                                            |
| <b>3</b>                                                                                                                                                                                                                                                      |                                                                                  |                                                                                                     |                                                                                            |
| <p><b>Please place an "X" next to the following statement to indicate your agreement:</b></p> <p><input checked="" type="checkbox"/> I certify that I have answered every question and have not altered the wording of any of the questions on this form.</p> |                                                                                  |                                                                                                     |                                                                                            |

## ICMJE DISCLOSURE FORM

**Date:** 12/21/2021

**Your Name:** Danilo Toni

**Manuscript Title:** European Stroke Organisation (ESO) - European Society for Minimally Invasive Neurological Therapy (ESMINT) expedited recommendation on intravenous thrombolysis before mechanical thrombectomy in patients with acute ischemic stroke

**Manuscript Number (if known):** neurintsurg-2021-018589

In the interest of transparency, we ask you to disclose all relationships/activities/interests listed below that are related to the content of your manuscript. "Related" means any relation with for-profit or not-for-profit third parties whose interests may be affected by the content of the manuscript. Disclosure represents a commitment to transparency and does not necessarily indicate a bias. If you are in doubt about whether to list a relationship/activity/interest, it is preferable that you do so.

The author's relationships/activities/interests should be defined broadly. For example, if your manuscript pertains to the epidemiology of hypertension, you should declare all relationships with manufacturers of antihypertensive medication, even if that medication is not mentioned in the manuscript.

In item #1 below, report all support for the work reported in this manuscript without time limit. For all other items, the time frame for disclosure is the past 36 months.

|                                                           | Name all entities with whom you have this relationship or indicate none (add rows as needed)                                                                                   | Specifications/Comments (e.g., if payments were made to you or to your institution)                                                                                                                                                                                                                                                                                                                                               |  |  |  |  |  |  |
|-----------------------------------------------------------|--------------------------------------------------------------------------------------------------------------------------------------------------------------------------------|-----------------------------------------------------------------------------------------------------------------------------------------------------------------------------------------------------------------------------------------------------------------------------------------------------------------------------------------------------------------------------------------------------------------------------------|--|--|--|--|--|--|
| <b>Time frame: Since the initial planning of the work</b> |                                                                                                                                                                                |                                                                                                                                                                                                                                                                                                                                                                                                                                   |  |  |  |  |  |  |
| <b>1</b>                                                  | All support for the present manuscript (e.g., funding, provision of study materials, medical writing, article processing charges, etc.)<br><b>No time limit for this item.</b> | <input checked="" type="checkbox"/> <b>None</b><br><table border="1" style="width: 100%; border-collapse: collapse; margin-top: 5px;"> <tr><td style="width: 60%; height: 20px;"></td><td style="width: 40%;"></td></tr> <tr><td style="height: 20px;"></td><td></td></tr> <tr><td style="height: 20px;"></td><td></td></tr> </table> <p style="font-size: small; margin-top: 5px;">Click the tab key to add additional rows.</p> |  |  |  |  |  |  |
|                                                           |                                                                                                                                                                                |                                                                                                                                                                                                                                                                                                                                                                                                                                   |  |  |  |  |  |  |
|                                                           |                                                                                                                                                                                |                                                                                                                                                                                                                                                                                                                                                                                                                                   |  |  |  |  |  |  |
|                                                           |                                                                                                                                                                                |                                                                                                                                                                                                                                                                                                                                                                                                                                   |  |  |  |  |  |  |
| <b>Time frame: past 36 months</b>                         |                                                                                                                                                                                |                                                                                                                                                                                                                                                                                                                                                                                                                                   |  |  |  |  |  |  |
| <b>2</b>                                                  | Grants or contracts from any entity (if not indicated in item #1 above).                                                                                                       | <input checked="" type="checkbox"/> <b>None</b><br><table border="1" style="width: 100%; border-collapse: collapse; margin-top: 5px;"> <tr><td style="width: 60%; height: 20px;"></td><td style="width: 40%;"></td></tr> <tr><td style="height: 20px;"></td><td></td></tr> <tr><td style="height: 20px;"></td><td></td></tr> </table>                                                                                             |  |  |  |  |  |  |
|                                                           |                                                                                                                                                                                |                                                                                                                                                                                                                                                                                                                                                                                                                                   |  |  |  |  |  |  |
|                                                           |                                                                                                                                                                                |                                                                                                                                                                                                                                                                                                                                                                                                                                   |  |  |  |  |  |  |
|                                                           |                                                                                                                                                                                |                                                                                                                                                                                                                                                                                                                                                                                                                                   |  |  |  |  |  |  |

|                                                                       |                                                                                                              | <b>Name all entities with whom you have this relationship or indicate none (add rows as needed)</b>                                                                                                                                                                                                                                             | <b>Specifications/Comments (e.g., if payments were made to you or to your institution)</b> |                    |           |                                |  |  |  |
|-----------------------------------------------------------------------|--------------------------------------------------------------------------------------------------------------|-------------------------------------------------------------------------------------------------------------------------------------------------------------------------------------------------------------------------------------------------------------------------------------------------------------------------------------------------|--------------------------------------------------------------------------------------------|--------------------|-----------|--------------------------------|--|--|--|
| <b>3</b>                                                              | Royalties or licenses                                                                                        | <input checked="" type="checkbox"/> <b>None</b><br><table border="1" style="width:100%; border-collapse: collapse;"> <tr><td> </td><td> </td></tr> <tr><td> </td><td> </td></tr> <tr><td> </td><td> </td></tr> </table>                                                                                                                         |                                                                                            |                    |           |                                |  |  |  |
|                                                                       |                                                                                                              |                                                                                                                                                                                                                                                                                                                                                 |                                                                                            |                    |           |                                |  |  |  |
|                                                                       |                                                                                                              |                                                                                                                                                                                                                                                                                                                                                 |                                                                                            |                    |           |                                |  |  |  |
|                                                                       |                                                                                                              |                                                                                                                                                                                                                                                                                                                                                 |                                                                                            |                    |           |                                |  |  |  |
| <b>4</b>                                                              | Consulting fees                                                                                              | <input checked="" type="checkbox"/> <b>None</b><br><table border="1" style="width:100%; border-collapse: collapse;"> <tr><td> </td><td> </td></tr> <tr><td> </td><td> </td></tr> <tr><td> </td><td> </td></tr> </table>                                                                                                                         |                                                                                            |                    |           |                                |  |  |  |
|                                                                       |                                                                                                              |                                                                                                                                                                                                                                                                                                                                                 |                                                                                            |                    |           |                                |  |  |  |
|                                                                       |                                                                                                              |                                                                                                                                                                                                                                                                                                                                                 |                                                                                            |                    |           |                                |  |  |  |
|                                                                       |                                                                                                              |                                                                                                                                                                                                                                                                                                                                                 |                                                                                            |                    |           |                                |  |  |  |
| <b>5</b>                                                              | Payment or honoraria for lectures, presentations, speakers bureaus, manuscript writing or educational events | <input type="checkbox"/> <b>None</b><br><table border="1" style="width:100%; border-collapse: collapse;"> <tr> <td>Abbott; Alexion; Bayer; Boehringer Ingelheim; Daiichi Sankyo; Pfizer</td> <td>Payment made to me</td> </tr> <tr> <td>Medtronic</td> <td>Payment made to my Institution</td> </tr> <tr> <td> </td> <td> </td> </tr> </table>  | Abbott; Alexion; Bayer; Boehringer Ingelheim; Daiichi Sankyo; Pfizer                       | Payment made to me | Medtronic | Payment made to my Institution |  |  |  |
| Abbott; Alexion; Bayer; Boehringer Ingelheim; Daiichi Sankyo; Pfizer  | Payment made to me                                                                                           |                                                                                                                                                                                                                                                                                                                                                 |                                                                                            |                    |           |                                |  |  |  |
| Medtronic                                                             | Payment made to my Institution                                                                               |                                                                                                                                                                                                                                                                                                                                                 |                                                                                            |                    |           |                                |  |  |  |
|                                                                       |                                                                                                              |                                                                                                                                                                                                                                                                                                                                                 |                                                                                            |                    |           |                                |  |  |  |
| <b>6</b>                                                              | Payment for expert testimony                                                                                 | <input checked="" type="checkbox"/> <b>None</b><br><table border="1" style="width:100%; border-collapse: collapse;"> <tr><td> </td><td> </td></tr> <tr><td> </td><td> </td></tr> <tr><td> </td><td> </td></tr> </table>                                                                                                                         |                                                                                            |                    |           |                                |  |  |  |
|                                                                       |                                                                                                              |                                                                                                                                                                                                                                                                                                                                                 |                                                                                            |                    |           |                                |  |  |  |
|                                                                       |                                                                                                              |                                                                                                                                                                                                                                                                                                                                                 |                                                                                            |                    |           |                                |  |  |  |
|                                                                       |                                                                                                              |                                                                                                                                                                                                                                                                                                                                                 |                                                                                            |                    |           |                                |  |  |  |
| <b>7</b>                                                              | Support for attending meetings and/or travel                                                                 | <input checked="" type="checkbox"/> <b>None</b><br><table border="1" style="width:100%; border-collapse: collapse;"> <tr><td> </td><td> </td></tr> <tr><td> </td><td> </td></tr> <tr><td> </td><td> </td></tr> </table>                                                                                                                         |                                                                                            |                    |           |                                |  |  |  |
|                                                                       |                                                                                                              |                                                                                                                                                                                                                                                                                                                                                 |                                                                                            |                    |           |                                |  |  |  |
|                                                                       |                                                                                                              |                                                                                                                                                                                                                                                                                                                                                 |                                                                                            |                    |           |                                |  |  |  |
|                                                                       |                                                                                                              |                                                                                                                                                                                                                                                                                                                                                 |                                                                                            |                    |           |                                |  |  |  |
| <b>8</b>                                                              | Patents planned, issued or pending                                                                           | <input checked="" type="checkbox"/> <b>None</b><br><table border="1" style="width:100%; border-collapse: collapse;"> <tr><td> </td><td> </td></tr> <tr><td> </td><td> </td></tr> <tr><td> </td><td> </td></tr> </table>                                                                                                                         |                                                                                            |                    |           |                                |  |  |  |
|                                                                       |                                                                                                              |                                                                                                                                                                                                                                                                                                                                                 |                                                                                            |                    |           |                                |  |  |  |
|                                                                       |                                                                                                              |                                                                                                                                                                                                                                                                                                                                                 |                                                                                            |                    |           |                                |  |  |  |
|                                                                       |                                                                                                              |                                                                                                                                                                                                                                                                                                                                                 |                                                                                            |                    |           |                                |  |  |  |
| <b>9</b>                                                              | Participation on a Data Safety Monitoring Board or Advisory Board                                            | <input type="checkbox"/> <b>None</b><br><table border="1" style="width:100%; border-collapse: collapse;"> <tr> <td>Abbott; Alexion; Bayer; Boehringer Ingelheim; Daiichi Sankyo;; Pfizer</td> <td>Payment made to me</td> </tr> <tr> <td>Medtronic</td> <td>Payment made to my Institution</td> </tr> <tr> <td> </td> <td> </td> </tr> </table> | Abbott; Alexion; Bayer; Boehringer Ingelheim; Daiichi Sankyo;; Pfizer                      | Payment made to me | Medtronic | Payment made to my Institution |  |  |  |
| Abbott; Alexion; Bayer; Boehringer Ingelheim; Daiichi Sankyo;; Pfizer | Payment made to me                                                                                           |                                                                                                                                                                                                                                                                                                                                                 |                                                                                            |                    |           |                                |  |  |  |
| Medtronic                                                             | Payment made to my Institution                                                                               |                                                                                                                                                                                                                                                                                                                                                 |                                                                                            |                    |           |                                |  |  |  |
|                                                                       |                                                                                                              |                                                                                                                                                                                                                                                                                                                                                 |                                                                                            |                    |           |                                |  |  |  |
| <b>10</b>                                                             | Leadership or fiduciary role in other board, society,                                                        | <input checked="" type="checkbox"/> <b>None</b><br><table border="1" style="width:100%; border-collapse: collapse;"> <tr><td> </td><td> </td></tr> <tr><td> </td><td> </td></tr> <tr><td> </td><td> </td></tr> </table>                                                                                                                         |                                                                                            |                    |           |                                |  |  |  |
|                                                                       |                                                                                                              |                                                                                                                                                                                                                                                                                                                                                 |                                                                                            |                    |           |                                |  |  |  |
|                                                                       |                                                                                                              |                                                                                                                                                                                                                                                                                                                                                 |                                                                                            |                    |           |                                |  |  |  |
|                                                                       |                                                                                                              |                                                                                                                                                                                                                                                                                                                                                 |                                                                                            |                    |           |                                |  |  |  |

|                                                                                                                                                                                                                                                               |                                                                                  | <b>Name all entities with whom you have this relationship or indicate none (add rows as needed)</b> | <b>Specifications/Comments (e.g., if payments were made to you or to your institution)</b> |
|---------------------------------------------------------------------------------------------------------------------------------------------------------------------------------------------------------------------------------------------------------------|----------------------------------------------------------------------------------|-----------------------------------------------------------------------------------------------------|--------------------------------------------------------------------------------------------|
|                                                                                                                                                                                                                                                               | committee or advocacy group, paid or unpaid                                      |                                                                                                     |                                                                                            |
| <b>1</b>                                                                                                                                                                                                                                                      | Stock or stock options                                                           | <input checked="" type="checkbox"/> <b>None</b>                                                     |                                                                                            |
| <b>1</b>                                                                                                                                                                                                                                                      |                                                                                  |                                                                                                     |                                                                                            |
| <b>1</b>                                                                                                                                                                                                                                                      | Receipt of equipment, materials, drugs, medical writing, gifts or other services | <input type="checkbox"/> <b>None</b>                                                                |                                                                                            |
| <b>2</b>                                                                                                                                                                                                                                                      |                                                                                  |                                                                                                     |                                                                                            |
| <b>1</b>                                                                                                                                                                                                                                                      | Other financial or non-financial interests                                       | <input type="checkbox"/> <b>None</b>                                                                |                                                                                            |
| <b>3</b>                                                                                                                                                                                                                                                      |                                                                                  |                                                                                                     |                                                                                            |
| <p><b>Please place an "X" next to the following statement to indicate your agreement:</b></p> <p><input checked="" type="checkbox"/> I certify that I have answered every question and have not altered the wording of any of the questions on this form.</p> |                                                                                  |                                                                                                     |                                                                                            |

## ICMJE DISCLOSURE FORM

**Date:** 12/21/2021

**Your Name:** Georgios Tsivgoulis

**Manuscript Title:** European Stroke Organisation (ESO) - European Society for Minimally Invasive Neurological Therapy (ESMINT) expedited recommendation on intravenous thrombolysis before mechanical thrombectomy in patients with acute ischemic stroke

**Manuscript Number (if known):** neurintsurg-2021-018589

In the interest of transparency, we ask you to disclose all relationships/activities/interests listed below that are related to the content of your manuscript. "Related" means any relation with for-profit or not-for-profit third parties whose interests may be affected by the content of the manuscript. Disclosure represents a commitment to transparency and does not necessarily indicate a bias. If you are in doubt about whether to list a relationship/activity/interest, it is preferable that you do so.

The author's relationships/activities/interests should be defined broadly. For example, if your manuscript pertains to the epidemiology of hypertension, you should declare all relationships with manufacturers of antihypertensive medication, even if that medication is not mentioned in the manuscript.

In item #1 below, report all support for the work reported in this manuscript without time limit. For all other items, the time frame for disclosure is the past 36 months.

|                                                           | Name all entities with whom you have this relationship or indicate none (add rows as needed)                                                                                   | Specifications/Comments (e.g., if payments were made to you or to your institution)                                                                                                                                                                                                                                                                                               |  |  |  |  |  |  |
|-----------------------------------------------------------|--------------------------------------------------------------------------------------------------------------------------------------------------------------------------------|-----------------------------------------------------------------------------------------------------------------------------------------------------------------------------------------------------------------------------------------------------------------------------------------------------------------------------------------------------------------------------------|--|--|--|--|--|--|
| <b>Time frame: Since the initial planning of the work</b> |                                                                                                                                                                                |                                                                                                                                                                                                                                                                                                                                                                                   |  |  |  |  |  |  |
| <b>1</b>                                                  | All support for the present manuscript (e.g., funding, provision of study materials, medical writing, article processing charges, etc.)<br><b>No time limit for this item.</b> | <input checked="" type="checkbox"/> <b>None</b><br><table border="1" style="width: 100%; height: 40px; margin-top: 5px;"> <tr><td style="width: 60%;"></td><td style="width: 40%;"></td></tr> <tr><td></td><td></td></tr> <tr><td></td><td></td></tr> </table> <div style="font-size: small; margin-top: 5px; text-align: right;">Click the tab key to add additional rows.</div> |  |  |  |  |  |  |
|                                                           |                                                                                                                                                                                |                                                                                                                                                                                                                                                                                                                                                                                   |  |  |  |  |  |  |
|                                                           |                                                                                                                                                                                |                                                                                                                                                                                                                                                                                                                                                                                   |  |  |  |  |  |  |
|                                                           |                                                                                                                                                                                |                                                                                                                                                                                                                                                                                                                                                                                   |  |  |  |  |  |  |
| <b>Time frame: past 36 months</b>                         |                                                                                                                                                                                |                                                                                                                                                                                                                                                                                                                                                                                   |  |  |  |  |  |  |
| <b>2</b>                                                  | Grants or contracts from any entity (if not indicated in item #1 above).                                                                                                       | <input checked="" type="checkbox"/> <b>None</b><br><table border="1" style="width: 100%; height: 40px; margin-top: 5px;"> <tr><td style="width: 60%;"></td><td style="width: 40%;"></td></tr> <tr><td></td><td></td></tr> <tr><td></td><td></td></tr> </table>                                                                                                                    |  |  |  |  |  |  |
|                                                           |                                                                                                                                                                                |                                                                                                                                                                                                                                                                                                                                                                                   |  |  |  |  |  |  |
|                                                           |                                                                                                                                                                                |                                                                                                                                                                                                                                                                                                                                                                                   |  |  |  |  |  |  |
|                                                           |                                                                                                                                                                                |                                                                                                                                                                                                                                                                                                                                                                                   |  |  |  |  |  |  |



|           |                                                                                                              | <b>Name all entities with whom you have this relationship or indicate none (add rows as needed)</b>                                                                                                                                                                                                           | <b>Specifications/Comments (e.g., if payments were made to you or to your institution)</b> |  |  |  |  |  |  |
|-----------|--------------------------------------------------------------------------------------------------------------|---------------------------------------------------------------------------------------------------------------------------------------------------------------------------------------------------------------------------------------------------------------------------------------------------------------|--------------------------------------------------------------------------------------------|--|--|--|--|--|--|
| <b>3</b>  | Royalties or licenses                                                                                        | <input checked="" type="checkbox"/> <b>None</b><br><table border="1" style="width:100%; border-collapse: collapse;"> <tr><td style="height: 15px;"> </td><td style="width: 50%;"> </td></tr> <tr><td style="height: 15px;"> </td><td> </td></tr> <tr><td style="height: 15px;"> </td><td> </td></tr> </table> |                                                                                            |  |  |  |  |  |  |
|           |                                                                                                              |                                                                                                                                                                                                                                                                                                               |                                                                                            |  |  |  |  |  |  |
|           |                                                                                                              |                                                                                                                                                                                                                                                                                                               |                                                                                            |  |  |  |  |  |  |
|           |                                                                                                              |                                                                                                                                                                                                                                                                                                               |                                                                                            |  |  |  |  |  |  |
| <b>4</b>  | Consulting fees                                                                                              | <input checked="" type="checkbox"/> <b>None</b><br><table border="1" style="width:100%; border-collapse: collapse;"> <tr><td style="height: 15px;"> </td><td style="width: 50%;"> </td></tr> <tr><td style="height: 15px;"> </td><td> </td></tr> <tr><td style="height: 15px;"> </td><td> </td></tr> </table> |                                                                                            |  |  |  |  |  |  |
|           |                                                                                                              |                                                                                                                                                                                                                                                                                                               |                                                                                            |  |  |  |  |  |  |
|           |                                                                                                              |                                                                                                                                                                                                                                                                                                               |                                                                                            |  |  |  |  |  |  |
|           |                                                                                                              |                                                                                                                                                                                                                                                                                                               |                                                                                            |  |  |  |  |  |  |
| <b>5</b>  | Payment or honoraria for lectures, presentations, speakers bureaus, manuscript writing or educational events | <input checked="" type="checkbox"/> <b>None</b><br><table border="1" style="width:100%; border-collapse: collapse;"> <tr><td style="height: 15px;"> </td><td style="width: 50%;"> </td></tr> <tr><td style="height: 15px;"> </td><td> </td></tr> <tr><td style="height: 15px;"> </td><td> </td></tr> </table> |                                                                                            |  |  |  |  |  |  |
|           |                                                                                                              |                                                                                                                                                                                                                                                                                                               |                                                                                            |  |  |  |  |  |  |
|           |                                                                                                              |                                                                                                                                                                                                                                                                                                               |                                                                                            |  |  |  |  |  |  |
|           |                                                                                                              |                                                                                                                                                                                                                                                                                                               |                                                                                            |  |  |  |  |  |  |
| <b>6</b>  | Payment for expert testimony                                                                                 | <input checked="" type="checkbox"/> <b>None</b><br><table border="1" style="width:100%; border-collapse: collapse;"> <tr><td style="height: 15px;"> </td><td style="width: 50%;"> </td></tr> <tr><td style="height: 15px;"> </td><td> </td></tr> <tr><td style="height: 15px;"> </td><td> </td></tr> </table> |                                                                                            |  |  |  |  |  |  |
|           |                                                                                                              |                                                                                                                                                                                                                                                                                                               |                                                                                            |  |  |  |  |  |  |
|           |                                                                                                              |                                                                                                                                                                                                                                                                                                               |                                                                                            |  |  |  |  |  |  |
|           |                                                                                                              |                                                                                                                                                                                                                                                                                                               |                                                                                            |  |  |  |  |  |  |
| <b>7</b>  | Support for attending meetings and/or travel                                                                 | <input checked="" type="checkbox"/> <b>None</b><br><table border="1" style="width:100%; border-collapse: collapse;"> <tr><td style="height: 15px;"> </td><td style="width: 50%;"> </td></tr> <tr><td style="height: 15px;"> </td><td> </td></tr> <tr><td style="height: 15px;"> </td><td> </td></tr> </table> |                                                                                            |  |  |  |  |  |  |
|           |                                                                                                              |                                                                                                                                                                                                                                                                                                               |                                                                                            |  |  |  |  |  |  |
|           |                                                                                                              |                                                                                                                                                                                                                                                                                                               |                                                                                            |  |  |  |  |  |  |
|           |                                                                                                              |                                                                                                                                                                                                                                                                                                               |                                                                                            |  |  |  |  |  |  |
| <b>8</b>  | Patents planned, issued or pending                                                                           | <input checked="" type="checkbox"/> <b>None</b><br><table border="1" style="width:100%; border-collapse: collapse;"> <tr><td style="height: 15px;"> </td><td style="width: 50%;"> </td></tr> <tr><td style="height: 15px;"> </td><td> </td></tr> <tr><td style="height: 15px;"> </td><td> </td></tr> </table> |                                                                                            |  |  |  |  |  |  |
|           |                                                                                                              |                                                                                                                                                                                                                                                                                                               |                                                                                            |  |  |  |  |  |  |
|           |                                                                                                              |                                                                                                                                                                                                                                                                                                               |                                                                                            |  |  |  |  |  |  |
|           |                                                                                                              |                                                                                                                                                                                                                                                                                                               |                                                                                            |  |  |  |  |  |  |
| <b>9</b>  | Participation on a Data Safety Monitoring Board or Advisory Board                                            | <input checked="" type="checkbox"/> <b>None</b><br><table border="1" style="width:100%; border-collapse: collapse;"> <tr><td style="height: 15px;"> </td><td style="width: 50%;"> </td></tr> <tr><td style="height: 15px;"> </td><td> </td></tr> <tr><td style="height: 15px;"> </td><td> </td></tr> </table> |                                                                                            |  |  |  |  |  |  |
|           |                                                                                                              |                                                                                                                                                                                                                                                                                                               |                                                                                            |  |  |  |  |  |  |
|           |                                                                                                              |                                                                                                                                                                                                                                                                                                               |                                                                                            |  |  |  |  |  |  |
|           |                                                                                                              |                                                                                                                                                                                                                                                                                                               |                                                                                            |  |  |  |  |  |  |
| <b>10</b> | Leadership or fiduciary role in other board, society,                                                        | <input checked="" type="checkbox"/> <b>None</b><br><table border="1" style="width:100%; border-collapse: collapse;"> <tr><td style="height: 15px;"> </td><td style="width: 50%;"> </td></tr> <tr><td style="height: 15px;"> </td><td> </td></tr> <tr><td style="height: 15px;"> </td><td> </td></tr> </table> |                                                                                            |  |  |  |  |  |  |
|           |                                                                                                              |                                                                                                                                                                                                                                                                                                               |                                                                                            |  |  |  |  |  |  |
|           |                                                                                                              |                                                                                                                                                                                                                                                                                                               |                                                                                            |  |  |  |  |  |  |
|           |                                                                                                              |                                                                                                                                                                                                                                                                                                               |                                                                                            |  |  |  |  |  |  |

|                                                                                                                                                                                                                                                               |                                                                                  | <b>Name all entities with whom you have this relationship or indicate none (add rows as needed)</b> | <b>Specifications/Comments (e.g., if payments were made to you or to your institution)</b> |
|---------------------------------------------------------------------------------------------------------------------------------------------------------------------------------------------------------------------------------------------------------------|----------------------------------------------------------------------------------|-----------------------------------------------------------------------------------------------------|--------------------------------------------------------------------------------------------|
|                                                                                                                                                                                                                                                               | committee or advocacy group, paid or unpaid                                      |                                                                                                     |                                                                                            |
| <b>1</b>                                                                                                                                                                                                                                                      | Stock or stock options                                                           | <input checked="" type="checkbox"/> <b>None</b>                                                     |                                                                                            |
| <b>1</b>                                                                                                                                                                                                                                                      |                                                                                  |                                                                                                     |                                                                                            |
| <b>1</b>                                                                                                                                                                                                                                                      | Receipt of equipment, materials, drugs, medical writing, gifts or other services | <input checked="" type="checkbox"/> <b>None</b>                                                     |                                                                                            |
| <b>2</b>                                                                                                                                                                                                                                                      |                                                                                  |                                                                                                     |                                                                                            |
| <b>1</b>                                                                                                                                                                                                                                                      | Other financial or non-financial interests                                       | <input checked="" type="checkbox"/> <b>None</b>                                                     |                                                                                            |
| <b>3</b>                                                                                                                                                                                                                                                      |                                                                                  |                                                                                                     |                                                                                            |
| <p><b>Please place an "X" next to the following statement to indicate your agreement:</b></p> <p><input checked="" type="checkbox"/> I certify that I have answered every question and have not altered the wording of any of the questions on this form.</p> |                                                                                  |                                                                                                     |                                                                                            |

## ICMJE DISCLOSURE FORM

**Date:** 12/21/2021

**Your Name:** Click or tap here to enter text.

**Manuscript Title:** European Stroke Organisation (ESO) - European Society for Minimally Invasive Neurological Therapy (ESMINT) expedited recommendation on intravenous thrombolysis before mechanical thrombectomy in patients with acute ischemic stroke

**Manuscript Number (if known):** neurintsurg-2021-018589

In the interest of transparency, we ask you to disclose all relationships/activities/interests listed below that are related to the content of your manuscript. "Related" means any relation with for-profit or not-for-profit third parties whose interests may be affected by the content of the manuscript. Disclosure represents a commitment to transparency and does not necessarily indicate a bias. If you are in doubt about whether to list a relationship/activity/interest, it is preferable that you do so.

The author's relationships/activities/interests should be defined broadly. For example, if your manuscript pertains to the epidemiology of hypertension, you should declare all relationships with manufacturers of antihypertensive medication, even if that medication is not mentioned in the manuscript.

In item #1 below, report all support for the work reported in this manuscript without time limit. For all other items, the time frame for disclosure is the past 36 months.

|                                                           | Name all entities with whom you have this relationship or indicate none (add rows as needed)                                                                                   | Specifications/Comments (e.g., if payments were made to you or to your institution)                                                                                                                                                                                                                                                                                                                                                                  |  |  |  |  |  |  |
|-----------------------------------------------------------|--------------------------------------------------------------------------------------------------------------------------------------------------------------------------------|------------------------------------------------------------------------------------------------------------------------------------------------------------------------------------------------------------------------------------------------------------------------------------------------------------------------------------------------------------------------------------------------------------------------------------------------------|--|--|--|--|--|--|
| <b>Time frame: Since the initial planning of the work</b> |                                                                                                                                                                                |                                                                                                                                                                                                                                                                                                                                                                                                                                                      |  |  |  |  |  |  |
| <b>1</b>                                                  | All support for the present manuscript (e.g., funding, provision of study materials, medical writing, article processing charges, etc.)<br><b>No time limit for this item.</b> | <input checked="" type="checkbox"/> <b>None</b><br><table border="1" style="width: 100%; border-collapse: collapse; margin-top: 5px;"> <tr><td style="width: 60%; height: 20px;"></td><td style="width: 40%;"></td></tr> <tr><td style="height: 20px;"></td><td></td></tr> <tr><td style="height: 20px;"></td><td></td></tr> </table> <p style="font-size: small; margin-top: 5px; text-align: right;">Click the tab key to add additional rows.</p> |  |  |  |  |  |  |
|                                                           |                                                                                                                                                                                |                                                                                                                                                                                                                                                                                                                                                                                                                                                      |  |  |  |  |  |  |
|                                                           |                                                                                                                                                                                |                                                                                                                                                                                                                                                                                                                                                                                                                                                      |  |  |  |  |  |  |
|                                                           |                                                                                                                                                                                |                                                                                                                                                                                                                                                                                                                                                                                                                                                      |  |  |  |  |  |  |
| <b>Time frame: past 36 months</b>                         |                                                                                                                                                                                |                                                                                                                                                                                                                                                                                                                                                                                                                                                      |  |  |  |  |  |  |
| <b>2</b>                                                  | Grants or contracts from any entity (if not indicated in item #1 above).                                                                                                       | <input checked="" type="checkbox"/> <b>None</b><br><table border="1" style="width: 100%; border-collapse: collapse; margin-top: 5px;"> <tr><td style="width: 60%; height: 20px;"></td><td style="width: 40%;"></td></tr> <tr><td style="height: 20px;"></td><td></td></tr> <tr><td style="height: 20px;"></td><td></td></tr> </table>                                                                                                                |  |  |  |  |  |  |
|                                                           |                                                                                                                                                                                |                                                                                                                                                                                                                                                                                                                                                                                                                                                      |  |  |  |  |  |  |
|                                                           |                                                                                                                                                                                |                                                                                                                                                                                                                                                                                                                                                                                                                                                      |  |  |  |  |  |  |
|                                                           |                                                                                                                                                                                |                                                                                                                                                                                                                                                                                                                                                                                                                                                      |  |  |  |  |  |  |

|                                     |                                                                                                              | <b>Name all entities with whom you have this relationship or indicate none (add rows as needed)</b>                                                                                                                                                                                                                                   | <b>Specifications/Comments (e.g., if payments were made to you or to your institution)</b> |  |  |  |  |  |  |
|-------------------------------------|--------------------------------------------------------------------------------------------------------------|---------------------------------------------------------------------------------------------------------------------------------------------------------------------------------------------------------------------------------------------------------------------------------------------------------------------------------------|--------------------------------------------------------------------------------------------|--|--|--|--|--|--|
| <b>3</b>                            | Royalties or licenses                                                                                        | <input checked="" type="checkbox"/> <b>None</b><br><table border="1" style="width: 100%; border-collapse: collapse;"> <tr><td style="height: 20px;"> </td><td style="width: 20%;"> </td></tr> <tr><td style="height: 20px;"> </td><td> </td></tr> <tr><td style="height: 20px;"> </td><td> </td></tr> </table>                        |                                                                                            |  |  |  |  |  |  |
|                                     |                                                                                                              |                                                                                                                                                                                                                                                                                                                                       |                                                                                            |  |  |  |  |  |  |
|                                     |                                                                                                              |                                                                                                                                                                                                                                                                                                                                       |                                                                                            |  |  |  |  |  |  |
|                                     |                                                                                                              |                                                                                                                                                                                                                                                                                                                                       |                                                                                            |  |  |  |  |  |  |
| <b>4</b>                            | Consulting fees                                                                                              | <input checked="" type="checkbox"/> <b>None</b><br><table border="1" style="width: 100%; border-collapse: collapse;"> <tr><td style="height: 20px;"> </td><td style="width: 20%;"> </td></tr> <tr><td style="height: 20px;"> </td><td> </td></tr> <tr><td style="height: 20px;"> </td><td> </td></tr> </table>                        |                                                                                            |  |  |  |  |  |  |
|                                     |                                                                                                              |                                                                                                                                                                                                                                                                                                                                       |                                                                                            |  |  |  |  |  |  |
|                                     |                                                                                                              |                                                                                                                                                                                                                                                                                                                                       |                                                                                            |  |  |  |  |  |  |
|                                     |                                                                                                              |                                                                                                                                                                                                                                                                                                                                       |                                                                                            |  |  |  |  |  |  |
| <b>5</b>                            | Payment or honoraria for lectures, presentations, speakers bureaus, manuscript writing or educational events | <input type="checkbox"/> <b>None</b><br><table border="1" style="width: 100%; border-collapse: collapse;"> <tr><td style="height: 20px;">Guerbet France</td><td style="width: 20%;"> </td></tr> <tr><td style="height: 20px;"> </td><td> </td></tr> <tr><td style="height: 20px;"> </td><td> </td></tr> </table>                      | Guerbet France                                                                             |  |  |  |  |  |  |
| Guerbet France                      |                                                                                                              |                                                                                                                                                                                                                                                                                                                                       |                                                                                            |  |  |  |  |  |  |
|                                     |                                                                                                              |                                                                                                                                                                                                                                                                                                                                       |                                                                                            |  |  |  |  |  |  |
|                                     |                                                                                                              |                                                                                                                                                                                                                                                                                                                                       |                                                                                            |  |  |  |  |  |  |
| <b>6</b>                            | Payment for expert testimony                                                                                 | <input checked="" type="checkbox"/> <b>None</b><br><table border="1" style="width: 100%; border-collapse: collapse;"> <tr><td style="height: 20px;"> </td><td style="width: 20%;"> </td></tr> <tr><td style="height: 20px;"> </td><td> </td></tr> <tr><td style="height: 20px;"> </td><td> </td></tr> </table>                        |                                                                                            |  |  |  |  |  |  |
|                                     |                                                                                                              |                                                                                                                                                                                                                                                                                                                                       |                                                                                            |  |  |  |  |  |  |
|                                     |                                                                                                              |                                                                                                                                                                                                                                                                                                                                       |                                                                                            |  |  |  |  |  |  |
|                                     |                                                                                                              |                                                                                                                                                                                                                                                                                                                                       |                                                                                            |  |  |  |  |  |  |
| <b>7</b>                            | Support for attending meetings and/or travel                                                                 | <input checked="" type="checkbox"/> <b>None</b><br><table border="1" style="width: 100%; border-collapse: collapse;"> <tr><td style="height: 20px;"> </td><td style="width: 20%;"> </td></tr> <tr><td style="height: 20px;"> </td><td> </td></tr> <tr><td style="height: 20px;"> </td><td> </td></tr> </table>                        |                                                                                            |  |  |  |  |  |  |
|                                     |                                                                                                              |                                                                                                                                                                                                                                                                                                                                       |                                                                                            |  |  |  |  |  |  |
|                                     |                                                                                                              |                                                                                                                                                                                                                                                                                                                                       |                                                                                            |  |  |  |  |  |  |
|                                     |                                                                                                              |                                                                                                                                                                                                                                                                                                                                       |                                                                                            |  |  |  |  |  |  |
| <b>8</b>                            | Patents planned, issued or pending                                                                           | <input checked="" type="checkbox"/> <b>None</b><br><table border="1" style="width: 100%; border-collapse: collapse;"> <tr><td style="height: 20px;"> </td><td style="width: 20%;"> </td></tr> <tr><td style="height: 20px;"> </td><td> </td></tr> <tr><td style="height: 20px;"> </td><td> </td></tr> </table>                        |                                                                                            |  |  |  |  |  |  |
|                                     |                                                                                                              |                                                                                                                                                                                                                                                                                                                                       |                                                                                            |  |  |  |  |  |  |
|                                     |                                                                                                              |                                                                                                                                                                                                                                                                                                                                       |                                                                                            |  |  |  |  |  |  |
|                                     |                                                                                                              |                                                                                                                                                                                                                                                                                                                                       |                                                                                            |  |  |  |  |  |  |
| <b>9</b>                            | Participation on a Data Safety Monitoring Board or Advisory Board                                            | <input checked="" type="checkbox"/> <b>None</b><br><table border="1" style="width: 100%; border-collapse: collapse;"> <tr><td style="height: 20px;"> </td><td style="width: 20%;"> </td></tr> <tr><td style="height: 20px;"> </td><td> </td></tr> <tr><td style="height: 20px;"> </td><td> </td></tr> </table>                        |                                                                                            |  |  |  |  |  |  |
|                                     |                                                                                                              |                                                                                                                                                                                                                                                                                                                                       |                                                                                            |  |  |  |  |  |  |
|                                     |                                                                                                              |                                                                                                                                                                                                                                                                                                                                       |                                                                                            |  |  |  |  |  |  |
|                                     |                                                                                                              |                                                                                                                                                                                                                                                                                                                                       |                                                                                            |  |  |  |  |  |  |
| <b>10</b>                           | Leadership or fiduciary role in other board, society,                                                        | <input type="checkbox"/> <b>None</b><br><table border="1" style="width: 100%; border-collapse: collapse;"> <tr><td style="height: 20px;">Chairman of the ESO Guideline Board</td><td style="width: 20%;"> </td></tr> <tr><td style="height: 20px;"> </td><td> </td></tr> <tr><td style="height: 20px;"> </td><td> </td></tr> </table> | Chairman of the ESO Guideline Board                                                        |  |  |  |  |  |  |
| Chairman of the ESO Guideline Board |                                                                                                              |                                                                                                                                                                                                                                                                                                                                       |                                                                                            |  |  |  |  |  |  |
|                                     |                                                                                                              |                                                                                                                                                                                                                                                                                                                                       |                                                                                            |  |  |  |  |  |  |
|                                     |                                                                                                              |                                                                                                                                                                                                                                                                                                                                       |                                                                                            |  |  |  |  |  |  |

|                                                                                                                                                                                                                                                               |                                                                                  | <b>Name all entities with whom you have this relationship or indicate none (add rows as needed)</b> | <b>Specifications/Comments (e.g., if payments were made to you or to your institution)</b> |
|---------------------------------------------------------------------------------------------------------------------------------------------------------------------------------------------------------------------------------------------------------------|----------------------------------------------------------------------------------|-----------------------------------------------------------------------------------------------------|--------------------------------------------------------------------------------------------|
|                                                                                                                                                                                                                                                               | committee or advocacy group, paid or unpaid                                      |                                                                                                     |                                                                                            |
| <b>1</b>                                                                                                                                                                                                                                                      | Stock or stock options                                                           | <input checked="" type="checkbox"/> <b>None</b>                                                     |                                                                                            |
| <b>1</b>                                                                                                                                                                                                                                                      |                                                                                  |                                                                                                     |                                                                                            |
| <b>1</b>                                                                                                                                                                                                                                                      | Receipt of equipment, materials, drugs, medical writing, gifts or other services | <input checked="" type="checkbox"/> <b>None</b>                                                     |                                                                                            |
| <b>2</b>                                                                                                                                                                                                                                                      |                                                                                  |                                                                                                     |                                                                                            |
| <b>1</b>                                                                                                                                                                                                                                                      | Other financial or non-financial interests                                       | <input checked="" type="checkbox"/> <b>None</b>                                                     |                                                                                            |
| <b>3</b>                                                                                                                                                                                                                                                      |                                                                                  |                                                                                                     |                                                                                            |
| <p><b>Please place an "X" next to the following statement to indicate your agreement:</b></p> <p><input checked="" type="checkbox"/> I certify that I have answered every question and have not altered the wording of any of the questions on this form.</p> |                                                                                  |                                                                                                     |                                                                                            |

## ICMJE DISCLOSURE FORM

**Date:** 12/21/2021

**Your Name:** Wim H. van Zwam

**Manuscript Title:** European Stroke Organisation (ESO) - European Society for Minimally Invasive Neurological Therapy (ESMINT) expedited recommendation on intravenous thrombolysis before mechanical thrombectomy in patients with acute ischemic stroke

**Manuscript Number (if known):** neurintsurg-2021-018589

In the interest of transparency, we ask you to disclose all relationships/activities/interests listed below that are related to the content of your manuscript. "Related" means any relation with for-profit or not-for-profit third parties whose interests may be affected by the content of the manuscript. Disclosure represents a commitment to transparency and does not necessarily indicate a bias. If you are in doubt about whether to list a relationship/activity/interest, it is preferable that you do so.

The author's relationships/activities/interests should be defined broadly. For example, if your manuscript pertains to the epidemiology of hypertension, you should declare all relationships with manufacturers of antihypertensive medication, even if that medication is not mentioned in the manuscript.

In item #1 below, report all support for the work reported in this manuscript without time limit. For all other items, the time frame for disclosure is the past 36 months.

|                                                           | Name all entities with whom you have this relationship or indicate none (add rows as needed)                                                                                   | Specifications/Comments (e.g., if payments were made to you or to your institution)                                                                                                                                                                                                                                                                                                                                                                  |                        |                     |                     |                     |                          |                                           |
|-----------------------------------------------------------|--------------------------------------------------------------------------------------------------------------------------------------------------------------------------------|------------------------------------------------------------------------------------------------------------------------------------------------------------------------------------------------------------------------------------------------------------------------------------------------------------------------------------------------------------------------------------------------------------------------------------------------------|------------------------|---------------------|---------------------|---------------------|--------------------------|-------------------------------------------|
| <b>Time frame: Since the initial planning of the work</b> |                                                                                                                                                                                |                                                                                                                                                                                                                                                                                                                                                                                                                                                      |                        |                     |                     |                     |                          |                                           |
| <b>1</b>                                                  | All support for the present manuscript (e.g., funding, provision of study materials, medical writing, article processing charges, etc.)<br><b>No time limit for this item.</b> | <input checked="" type="checkbox"/> <b>None</b><br><table border="1" style="width: 100%; border-collapse: collapse; margin-top: 5px;"> <tr><td style="width: 60%; height: 15px;"></td><td style="width: 40%;"></td></tr> <tr><td style="height: 15px;"></td><td></td></tr> <tr><td style="height: 15px;"></td><td style="text-align: right; font-size: small;">Click the tab key to add additional rows.</td></tr> </table>                          |                        |                     |                     |                     |                          | Click the tab key to add additional rows. |
|                                                           |                                                                                                                                                                                |                                                                                                                                                                                                                                                                                                                                                                                                                                                      |                        |                     |                     |                     |                          |                                           |
|                                                           |                                                                                                                                                                                |                                                                                                                                                                                                                                                                                                                                                                                                                                                      |                        |                     |                     |                     |                          |                                           |
|                                                           | Click the tab key to add additional rows.                                                                                                                                      |                                                                                                                                                                                                                                                                                                                                                                                                                                                      |                        |                     |                     |                     |                          |                                           |
| <b>Time frame: past 36 months</b>                         |                                                                                                                                                                                |                                                                                                                                                                                                                                                                                                                                                                                                                                                      |                        |                     |                     |                     |                          |                                           |
| <b>2</b>                                                  | Grants or contracts from any entity (if not indicated in item #1 above).                                                                                                       | <input type="checkbox"/> <b>None</b><br><table border="1" style="width: 100%; border-collapse: collapse; margin-top: 5px;"> <tr><td style="width: 60%; height: 15px;">Dutch Heart Foundation</td><td style="width: 40%;">Paid to Institution</td></tr> <tr><td style="height: 15px;">Dutch Brain Council</td><td>Paid to Institution</td></tr> <tr><td style="height: 15px;">ZonMW (Dutch Government)</td><td>Paid to Institution</td></tr> </table> | Dutch Heart Foundation | Paid to Institution | Dutch Brain Council | Paid to Institution | ZonMW (Dutch Government) | Paid to Institution                       |
| Dutch Heart Foundation                                    | Paid to Institution                                                                                                                                                            |                                                                                                                                                                                                                                                                                                                                                                                                                                                      |                        |                     |                     |                     |                          |                                           |
| Dutch Brain Council                                       | Paid to Institution                                                                                                                                                            |                                                                                                                                                                                                                                                                                                                                                                                                                                                      |                        |                     |                     |                     |                          |                                           |
| ZonMW (Dutch Government)                                  | Paid to Institution                                                                                                                                                            |                                                                                                                                                                                                                                                                                                                                                                                                                                                      |                        |                     |                     |                     |                          |                                           |

|           |                                                                                                              | <b>Name all entities with whom you have this relationship or indicate none (add rows as needed)</b> | <b>Specifications/Comments (e.g., if payments were made to you or to your institution)</b> |
|-----------|--------------------------------------------------------------------------------------------------------------|-----------------------------------------------------------------------------------------------------|--------------------------------------------------------------------------------------------|
| <b>3</b>  | Royalties or licenses                                                                                        | <input checked="" type="checkbox"/> <b>None</b>                                                     |                                                                                            |
|           |                                                                                                              |                                                                                                     |                                                                                            |
|           |                                                                                                              |                                                                                                     |                                                                                            |
| <b>4</b>  | Consulting fees                                                                                              | <input type="checkbox"/> <b>None</b>                                                                |                                                                                            |
|           |                                                                                                              | Philips                                                                                             | Paid to Institution                                                                        |
|           |                                                                                                              |                                                                                                     |                                                                                            |
|           |                                                                                                              |                                                                                                     |                                                                                            |
| <b>5</b>  | Payment or honoraria for lectures, presentations, speakers bureaus, manuscript writing or educational events | <input type="checkbox"/> <b>None</b>                                                                |                                                                                            |
|           |                                                                                                              | Cerenovus                                                                                           | Paid to Institution                                                                        |
|           |                                                                                                              | Stryker                                                                                             | Paid to Institution                                                                        |
|           |                                                                                                              | NicoLab                                                                                             | Paid to Institution                                                                        |
| <b>6</b>  | Payment for expert testimony                                                                                 | <input checked="" type="checkbox"/> <b>None</b>                                                     |                                                                                            |
|           |                                                                                                              |                                                                                                     |                                                                                            |
|           |                                                                                                              |                                                                                                     |                                                                                            |
| <b>7</b>  | Support for attending meetings and/or travel                                                                 | <input checked="" type="checkbox"/> <b>None</b>                                                     |                                                                                            |
|           |                                                                                                              |                                                                                                     |                                                                                            |
|           |                                                                                                              |                                                                                                     |                                                                                            |
| <b>8</b>  | Patents planned, issued or pending                                                                           | <input checked="" type="checkbox"/> <b>None</b>                                                     |                                                                                            |
|           |                                                                                                              |                                                                                                     |                                                                                            |
|           |                                                                                                              |                                                                                                     |                                                                                            |
| <b>9</b>  | Participation on a Data Safety Monitoring Board or Advisory Board                                            | <input type="checkbox"/> <b>None</b>                                                                |                                                                                            |
|           |                                                                                                              | WETRUST (Philips, Best, The Netherlands)                                                            | Paid to Institution                                                                        |
|           |                                                                                                              | Solonda (Anaconda, Barcelona, Spain)                                                                | Paid to Institution                                                                        |
|           |                                                                                                              | InExtremis (CHU, Montpellier, France)                                                               | Paid to Institution                                                                        |
| <b>10</b> | Leadership or fiduciary role in other board, society,                                                        | <input checked="" type="checkbox"/> <b>None</b>                                                     |                                                                                            |
|           |                                                                                                              |                                                                                                     |                                                                                            |
|           |                                                                                                              |                                                                                                     |                                                                                            |

|                                                                                                                                                                                                                                                               |                                                                                  | <b>Name all entities with whom you have this relationship or indicate none (add rows as needed)</b> | <b>Specifications/Comments (e.g., if payments were made to you or to your institution)</b> |
|---------------------------------------------------------------------------------------------------------------------------------------------------------------------------------------------------------------------------------------------------------------|----------------------------------------------------------------------------------|-----------------------------------------------------------------------------------------------------|--------------------------------------------------------------------------------------------|
|                                                                                                                                                                                                                                                               | committee or advocacy group, paid or unpaid                                      |                                                                                                     |                                                                                            |
| <b>1</b>                                                                                                                                                                                                                                                      | Stock or stock options                                                           | <input checked="" type="checkbox"/> <b>None</b>                                                     |                                                                                            |
| <b>1</b>                                                                                                                                                                                                                                                      |                                                                                  |                                                                                                     |                                                                                            |
| <b>1</b>                                                                                                                                                                                                                                                      | Receipt of equipment, materials, drugs, medical writing, gifts or other services | <input checked="" type="checkbox"/> <b>None</b>                                                     |                                                                                            |
| <b>2</b>                                                                                                                                                                                                                                                      |                                                                                  |                                                                                                     |                                                                                            |
| <b>1</b>                                                                                                                                                                                                                                                      | Other financial or non-financial interests                                       | <input checked="" type="checkbox"/> <b>None</b>                                                     |                                                                                            |
| <b>3</b>                                                                                                                                                                                                                                                      |                                                                                  |                                                                                                     |                                                                                            |
| <p><b>Please place an "X" next to the following statement to indicate your agreement:</b></p> <p><input checked="" type="checkbox"/> I certify that I have answered every question and have not altered the wording of any of the questions on this form.</p> |                                                                                  |                                                                                                     |                                                                                            |



## ICMJE DISCLOSURE FORM

**Date:** 12/21/2021

**Your Name:** William Whiteley

**Manuscript Title:** European Stroke Organisation (ESO) - European Society for Minimally Invasive Neurological Therapy (ESMINT) expedited recommendation on intravenous thrombolysis before mechanical thrombectomy in patients with acute ischemic stroke

**Manuscript Number (if known):** neurintsurg-2021-018589

In the interest of transparency, we ask you to disclose all relationships/activities/interests listed below that are related to the content of your manuscript. "Related" means any relation with for-profit or not-for-profit third parties whose interests may be affected by the content of the manuscript. Disclosure represents a commitment to transparency and does not necessarily indicate a bias. If you are in doubt about whether to list a relationship/activity/interest, it is preferable that you do so.

The author's relationships/activities/interests should be defined broadly. For example, if your manuscript pertains to the epidemiology of hypertension, you should declare all relationships with manufacturers of antihypertensive medication, even if that medication is not mentioned in the manuscript.

In item #1 below, report all support for the work reported in this manuscript without time limit. For all other items, the time frame for disclosure is the past 36 months.

|                                                           | <b>Name all entities with whom you have this relationship or indicate none (add rows as needed)</b>                                                                            | <b>Specifications/Comments (e.g., if payments were made to you or to your institution)</b>                                                                                                                                                                                                                                                                                                                                    |                                  |  |                     |  |  |  |
|-----------------------------------------------------------|--------------------------------------------------------------------------------------------------------------------------------------------------------------------------------|-------------------------------------------------------------------------------------------------------------------------------------------------------------------------------------------------------------------------------------------------------------------------------------------------------------------------------------------------------------------------------------------------------------------------------|----------------------------------|--|---------------------|--|--|--|
| <b>Time frame: Since the initial planning of the work</b> |                                                                                                                                                                                |                                                                                                                                                                                                                                                                                                                                                                                                                               |                                  |  |                     |  |  |  |
| <b>1</b>                                                  | All support for the present manuscript (e.g., funding, provision of study materials, medical writing, article processing charges, etc.)<br><b>No time limit for this item.</b> | <input checked="" type="checkbox"/> <b>None</b><br><table border="1" style="width: 100%; border-collapse: collapse; margin-top: 10px;"> <tr><td style="height: 20px;"> </td><td style="width: 50px;"> </td></tr> <tr><td style="height: 20px;"> </td><td> </td></tr> <tr><td style="height: 20px;"> </td><td> </td></tr> </table> <p style="font-size: small; margin-top: 5px;">Click the tab key to add additional rows.</p> |                                  |  |                     |  |  |  |
|                                                           |                                                                                                                                                                                |                                                                                                                                                                                                                                                                                                                                                                                                                               |                                  |  |                     |  |  |  |
|                                                           |                                                                                                                                                                                |                                                                                                                                                                                                                                                                                                                                                                                                                               |                                  |  |                     |  |  |  |
|                                                           |                                                                                                                                                                                |                                                                                                                                                                                                                                                                                                                                                                                                                               |                                  |  |                     |  |  |  |
| <b>Time frame: past 36 months</b>                         |                                                                                                                                                                                |                                                                                                                                                                                                                                                                                                                                                                                                                               |                                  |  |                     |  |  |  |
| <b>2</b>                                                  | Grants or contracts from any entity (if not indicated in item #1 above).                                                                                                       | <input type="checkbox"/> <b>None</b><br><table border="1" style="width: 100%; border-collapse: collapse; margin-top: 10px;"> <tr><td style="height: 20px;">CSO Senior Fellowship SCAF/17/01</td><td style="width: 50px;"> </td></tr> <tr><td style="height: 20px;">Alzheimer's Society</td><td> </td></tr> <tr><td style="height: 20px;"> </td><td> </td></tr> </table>                                                       | CSO Senior Fellowship SCAF/17/01 |  | Alzheimer's Society |  |  |  |
| CSO Senior Fellowship SCAF/17/01                          |                                                                                                                                                                                |                                                                                                                                                                                                                                                                                                                                                                                                                               |                                  |  |                     |  |  |  |
| Alzheimer's Society                                       |                                                                                                                                                                                |                                                                                                                                                                                                                                                                                                                                                                                                                               |                                  |  |                     |  |  |  |
|                                                           |                                                                                                                                                                                |                                                                                                                                                                                                                                                                                                                                                                                                                               |                                  |  |                     |  |  |  |

|           |                                                                                                              | <b>Name all entities with whom you have this relationship or indicate none (add rows as needed)</b>         | <b>Specifications/Comments (e.g., if payments were made to you or to your institution)</b> |
|-----------|--------------------------------------------------------------------------------------------------------------|-------------------------------------------------------------------------------------------------------------|--------------------------------------------------------------------------------------------|
| <b>3</b>  | Royalties or licenses                                                                                        | <input checked="" type="checkbox"/> <b>None</b><br><br><br>                                                 |                                                                                            |
| <b>4</b>  | Consulting fees                                                                                              | <input type="checkbox"/> <b>None</b><br><br>Bayer                                                           | Payment to institution<br><br>                                                             |
| <b>5</b>  | Payment or honoraria for lectures, presentations, speakers bureaus, manuscript writing or educational events | <input checked="" type="checkbox"/> <b>None</b><br><br><br>                                                 |                                                                                            |
| <b>6</b>  | Payment for expert testimony                                                                                 | <input type="checkbox"/> <b>None</b><br><br>Expert testimony to UK courts                                   |                                                                                            |
| <b>7</b>  | Support for attending meetings and/or travel                                                                 | <input checked="" type="checkbox"/> <b>None</b><br><br><br>                                                 |                                                                                            |
| <b>8</b>  | Patents planned, issued or pending                                                                           | <input checked="" type="checkbox"/> <b>None</b><br><br><br>                                                 |                                                                                            |
| <b>9</b>  | Participation on a Data Safety Monitoring Board or Advisory Board                                            | <input type="checkbox"/> <b>None</b><br><br>CATIS-ICAD<br>MOSES, PROTECT-U, INTERACT-3,<br>TEMPO-2<br>PAX-D |                                                                                            |
| <b>10</b> | Leadership or fiduciary role in other board, society,                                                        | <input checked="" type="checkbox"/> <b>None</b><br><br><br>                                                 |                                                                                            |

|                                                                                                                                                                                                                                                               |                                                                                  | <b>Name all entities with whom you have this relationship or indicate none (add rows as needed)</b> | <b>Specifications/Comments (e.g., if payments were made to you or to your institution)</b> |
|---------------------------------------------------------------------------------------------------------------------------------------------------------------------------------------------------------------------------------------------------------------|----------------------------------------------------------------------------------|-----------------------------------------------------------------------------------------------------|--------------------------------------------------------------------------------------------|
|                                                                                                                                                                                                                                                               | committee or advocacy group, paid or unpaid                                      |                                                                                                     |                                                                                            |
| <b>1</b>                                                                                                                                                                                                                                                      | Stock or stock options                                                           | <input checked="" type="checkbox"/> <b>None</b>                                                     |                                                                                            |
| <b>1</b>                                                                                                                                                                                                                                                      |                                                                                  |                                                                                                     |                                                                                            |
| <b>1</b>                                                                                                                                                                                                                                                      | Receipt of equipment, materials, drugs, medical writing, gifts or other services | <input checked="" type="checkbox"/> <b>None</b>                                                     |                                                                                            |
| <b>2</b>                                                                                                                                                                                                                                                      |                                                                                  |                                                                                                     |                                                                                            |
| <b>1</b>                                                                                                                                                                                                                                                      | Other financial or non-financial interests                                       | <input checked="" type="checkbox"/> <b>None</b>                                                     |                                                                                            |
| <b>3</b>                                                                                                                                                                                                                                                      |                                                                                  |                                                                                                     |                                                                                            |
| <p><b>Please place an "X" next to the following statement to indicate your agreement:</b></p> <p><input checked="" type="checkbox"/> I certify that I have answered every question and have not altered the wording of any of the questions on this form.</p> |                                                                                  |                                                                                                     |                                                                                            |

**ICMJE DISCLOSURE FORM**

**Date:** 12/21/2021

**Your Name:** Andrea Zini

**Manuscript Title:** European Stroke Organisation (ESO) - European Society for Minimally Invasive Neurological Therapy (ESMINT) expedited recommendation on intravenous thrombolysis before mechanical thrombectomy in patients with acute ischemic stroke

**Manuscript Number (if known):** neurintsurg-2021-018589

In the interest of transparency, we ask you to disclose all relationships/activities/interests listed below that are related to the content of your manuscript. "Related" means any relation with for-profit or not-for-profit third parties whose interests may be affected by the content of the manuscript. Disclosure represents a commitment to transparency and does not necessarily indicate a bias. If you are in doubt about whether to list a relationship/activity/interest, it is preferable that you do so.

The author's relationships/activities/interests should be defined broadly. For example, if your manuscript pertains to the epidemiology of hypertension, you should declare all relationships with manufacturers of antihypertensive medication, even if that medication is not mentioned in the manuscript.

In item #1 below, report all support for the work reported in this manuscript without time limit. For all other items, the time frame for disclosure is the past 36 months.

|                                                           |                                                                                                                                                                                | <b>Name all entities with whom you have this relationship or indicate none (add rows as needed)</b>                                                                                                                                                            | <b>Specifications/Comments (e.g., if payments were made to you or to your institution)</b> |
|-----------------------------------------------------------|--------------------------------------------------------------------------------------------------------------------------------------------------------------------------------|----------------------------------------------------------------------------------------------------------------------------------------------------------------------------------------------------------------------------------------------------------------|--------------------------------------------------------------------------------------------|
| <b>Time frame: Since the initial planning of the work</b> |                                                                                                                                                                                |                                                                                                                                                                                                                                                                |                                                                                            |
| <b>1</b>                                                  | All support for the present manuscript (e.g., funding, provision of study materials, medical writing, article processing charges, etc.)<br><b>No time limit for this item.</b> | <input checked="" type="checkbox"/> <b>None</b>                                                                                                                                                                                                                |                                                                                            |
|                                                           |                                                                                                                                                                                |                                                                                                                                                                                                                                                                | Click the tab key to add additional rows.                                                  |
| <b>Time frame: past 36 months</b>                         |                                                                                                                                                                                |                                                                                                                                                                                                                                                                |                                                                                            |
| <b>2</b>                                                  | Grants or contracts from any entity (if not indicated in item #1 above).                                                                                                       | <input type="checkbox"/> <b>None</b>                                                                                                                                                                                                                           |                                                                                            |
|                                                           |                                                                                                                                                                                | Principal Investigator for project RF-2019-12370834 "FibER: Fibrinogen replacement to prevent intracranial haemorrhage in ischemic stroke patients after thrombolysis: a pilot RCT (sponsored by Grant of the Italian Health Ministry), EudraCT 2020-005242-41 |                                                                                            |

|          |                                                                                                              | <b>Name all entities with whom you have this relationship or indicate none (add rows as needed)</b> | <b>Specifications/Comments (e.g., if payments were made to you or to your institution)</b> |
|----------|--------------------------------------------------------------------------------------------------------------|-----------------------------------------------------------------------------------------------------|--------------------------------------------------------------------------------------------|
|          |                                                                                                              |                                                                                                     |                                                                                            |
| <b>3</b> | Royalties or licenses                                                                                        | <input checked="" type="checkbox"/> <b>None</b>                                                     |                                                                                            |
|          |                                                                                                              |                                                                                                     |                                                                                            |
| <b>4</b> | Consulting fees                                                                                              | <input type="checkbox"/> <b>None</b>                                                                |                                                                                            |
|          |                                                                                                              | Boehringer-Ingelheim                                                                                |                                                                                            |
|          |                                                                                                              |                                                                                                     |                                                                                            |
| <b>5</b> | Payment or honoraria for lectures, presentations, speakers bureaus, manuscript writing or educational events | <input type="checkbox"/> <b>None</b>                                                                |                                                                                            |
|          |                                                                                                              | Cerenovus (speaker fees)                                                                            |                                                                                            |
|          |                                                                                                              |                                                                                                     |                                                                                            |
| <b>6</b> | Payment for expert testimony                                                                                 | <input checked="" type="checkbox"/> <b>None</b>                                                     |                                                                                            |
|          |                                                                                                              |                                                                                                     |                                                                                            |
| <b>7</b> | Support for attending meetings and/or travel                                                                 | <input checked="" type="checkbox"/> <b>None</b>                                                     |                                                                                            |
|          |                                                                                                              |                                                                                                     |                                                                                            |
| <b>8</b> | Patents planned, issued or pending                                                                           | <input type="checkbox"/> <b>None</b>                                                                |                                                                                            |
|          |                                                                                                              |                                                                                                     |                                                                                            |
| <b>9</b> | Participation on a Data Safety Monitoring Board or Advisory                                                  | <input type="checkbox"/> <b>None</b>                                                                |                                                                                            |
|          |                                                                                                              | Advisory boards for Stryker, Alexion, Daiichi-Sankio                                                |                                                                                            |
|          |                                                                                                              |                                                                                                     |                                                                                            |

|                                                                                                                                                                                                                                                               |                                                                                                   | <b>Name all entities with whom you have this relationship or indicate none (add rows as needed)</b>                                                                                                                                                                                                                                                                                                              | <b>Specifications/Comments (e.g., if payments were made to you or to your institution)</b>           |  |  |  |  |  |  |
|---------------------------------------------------------------------------------------------------------------------------------------------------------------------------------------------------------------------------------------------------------------|---------------------------------------------------------------------------------------------------|------------------------------------------------------------------------------------------------------------------------------------------------------------------------------------------------------------------------------------------------------------------------------------------------------------------------------------------------------------------------------------------------------------------|------------------------------------------------------------------------------------------------------|--|--|--|--|--|--|
|                                                                                                                                                                                                                                                               | Board                                                                                             |                                                                                                                                                                                                                                                                                                                                                                                                                  |                                                                                                      |  |  |  |  |  |  |
| <b>10</b>                                                                                                                                                                                                                                                     | Leadership or fiduciary role in other board, society, committee or advocacy group, paid or unpaid | <input checked="" type="checkbox"/> <b>None</b><br><table border="1" style="width: 100%; border-collapse: collapse;"> <tr><td style="width: 50%; height: 20px;"></td><td style="width: 50%;"></td></tr> <tr><td style="height: 20px;"></td><td></td></tr> <tr><td style="height: 20px;"></td><td></td></tr> </table>                                                                                             |                                                                                                      |  |  |  |  |  |  |
|                                                                                                                                                                                                                                                               |                                                                                                   |                                                                                                                                                                                                                                                                                                                                                                                                                  |                                                                                                      |  |  |  |  |  |  |
|                                                                                                                                                                                                                                                               |                                                                                                   |                                                                                                                                                                                                                                                                                                                                                                                                                  |                                                                                                      |  |  |  |  |  |  |
|                                                                                                                                                                                                                                                               |                                                                                                   |                                                                                                                                                                                                                                                                                                                                                                                                                  |                                                                                                      |  |  |  |  |  |  |
| <b>11</b>                                                                                                                                                                                                                                                     | Stock or stock options                                                                            | <input checked="" type="checkbox"/> <b>None</b><br><table border="1" style="width: 100%; border-collapse: collapse;"> <tr><td style="width: 50%; height: 20px;"></td><td style="width: 50%;"></td></tr> <tr><td style="height: 20px;"></td><td></td></tr> <tr><td style="height: 20px;"></td><td></td></tr> </table>                                                                                             |                                                                                                      |  |  |  |  |  |  |
|                                                                                                                                                                                                                                                               |                                                                                                   |                                                                                                                                                                                                                                                                                                                                                                                                                  |                                                                                                      |  |  |  |  |  |  |
|                                                                                                                                                                                                                                                               |                                                                                                   |                                                                                                                                                                                                                                                                                                                                                                                                                  |                                                                                                      |  |  |  |  |  |  |
|                                                                                                                                                                                                                                                               |                                                                                                   |                                                                                                                                                                                                                                                                                                                                                                                                                  |                                                                                                      |  |  |  |  |  |  |
| <b>12</b>                                                                                                                                                                                                                                                     | Receipt of equipment, materials, drugs, medical writing, gifts or other services                  | <input checked="" type="checkbox"/> <b>None</b><br><table border="1" style="width: 100%; border-collapse: collapse;"> <tr><td style="width: 50%; height: 20px;"></td><td style="width: 50%;"></td></tr> <tr><td style="height: 20px;"></td><td></td></tr> <tr><td style="height: 20px;"></td><td></td></tr> </table>                                                                                             |                                                                                                      |  |  |  |  |  |  |
|                                                                                                                                                                                                                                                               |                                                                                                   |                                                                                                                                                                                                                                                                                                                                                                                                                  |                                                                                                      |  |  |  |  |  |  |
|                                                                                                                                                                                                                                                               |                                                                                                   |                                                                                                                                                                                                                                                                                                                                                                                                                  |                                                                                                      |  |  |  |  |  |  |
|                                                                                                                                                                                                                                                               |                                                                                                   |                                                                                                                                                                                                                                                                                                                                                                                                                  |                                                                                                      |  |  |  |  |  |  |
| <b>13</b>                                                                                                                                                                                                                                                     | Other financial or non-financial interests                                                        | <input type="checkbox"/> <b>None</b><br><table border="1" style="width: 100%; border-collapse: collapse;"> <tr> <td style="width: 50%; padding: 5px;">Member of editorial board of Journal of Clinical Neuroscience and of Frontiers in Neurology (Stroke)</td> <td style="width: 50%;"></td> </tr> <tr><td style="height: 20px;"></td><td></td></tr> <tr><td style="height: 20px;"></td><td></td></tr> </table> | Member of editorial board of Journal of Clinical Neuroscience and of Frontiers in Neurology (Stroke) |  |  |  |  |  |  |
| Member of editorial board of Journal of Clinical Neuroscience and of Frontiers in Neurology (Stroke)                                                                                                                                                          |                                                                                                   |                                                                                                                                                                                                                                                                                                                                                                                                                  |                                                                                                      |  |  |  |  |  |  |
|                                                                                                                                                                                                                                                               |                                                                                                   |                                                                                                                                                                                                                                                                                                                                                                                                                  |                                                                                                      |  |  |  |  |  |  |
|                                                                                                                                                                                                                                                               |                                                                                                   |                                                                                                                                                                                                                                                                                                                                                                                                                  |                                                                                                      |  |  |  |  |  |  |
| <p><b>Please place an "X" next to the following statement to indicate your agreement:</b></p> <p><input checked="" type="checkbox"/> I certify that I have answered every question and have not altered the wording of any of the questions on this form.</p> |                                                                                                   |                                                                                                                                                                                                                                                                                                                                                                                                                  |                                                                                                      |  |  |  |  |  |  |
